# Supplementary material
Source: publisher figshare collection journal article supplement (https://acs.figshare.com/ndownloader/files/4637245)

# Supporting information

## Modular Synthesis of 5-Substituted Thiophen-2-yl C-2'-Deoxyribonucleosides

*Jan Bárta,<sup>†</sup> Radek Pohl,<sup>†</sup> Blanka Klepetářová,<sup>†</sup> Nikolaus P. Ernsting<sup>‡</sup> and Michal Hocek<sup>†\*</sup>*

<sup>†</sup> Institute of Organic Chemistry and Biochemistry, Academy of Sciences of the Czech Republic, CZ-16610, Prague 6, Czech Republic

<sup>‡</sup> Institut für Chemie, Humboldt Universität zu Berlin, Brook-Taylor-Str. 2, D-12489 Berlin, Germany

hocek@uochb.cas.cz

### List of contents:

|                                                      |     |
|------------------------------------------------------|-----|
| 1. Experimental procedures and characterization data | S2  |
| 2. Details of fluorescence measurements              | S22 |
| 3. Copies of NMR spectra                             | S23 |

## Experimental

**General methods.** Melting points were determined on a Kofler block. Optical rotations were measured at 25 °C,  $[\alpha]_D^{20}$  values are given in  $10^{-1} \text{ deg cm}^2 \text{ g}^{-1}$ . NMR spectra were measured at 400 MHz for  $^1\text{H}$  and 100.6 MHz for  $^{13}\text{C}$  nuclei, at 500 MHz for  $^1\text{H}$  and 125.8 MHz for  $^{13}\text{C}$ , or at 600 MHz for  $^1\text{H}$  and 151 MHz for  $^{13}\text{C}$  in  $\text{CDCl}_3$  (TMS was used as internal standard),  $\text{MeOH-}d_4$  (referenced to the residual solvent signal), or  $\text{DMSO-}d_6$  (referenced to the residual solvent signal). Chemical shifts are given in ppm ( $\delta$ -scale), coupling constants ( $J$ ) in Hz. Complete assignment of all NMR signals was performed using a combination of H,H-COSY, H,H-ROESY, H,C-HSQC and H,C-HMBC experiments. Mass spectra were measured using FAB (ionization by Xe, accelerating voltage 8 kV, glycerol + thioglycelor matrix) or EI (electron energy 70 eV). DMF was degassed *in vacuo* and stored over molecular sieves under argon.

### 1) Alternative ways of preparation of 4a

**1 $\beta$ -(5-bromothiophen-2-yl)-1,2-dideoxy-3,5-di-*O*-toluoyl-D-ribofuranose (4a) and 1 $\alpha$ -(5-bromothiophen-2-yl)-1,2-dideoxy-3,5-di-*O*-toluoyl-D-ribofuranose (5a).**

### Scheme S1:

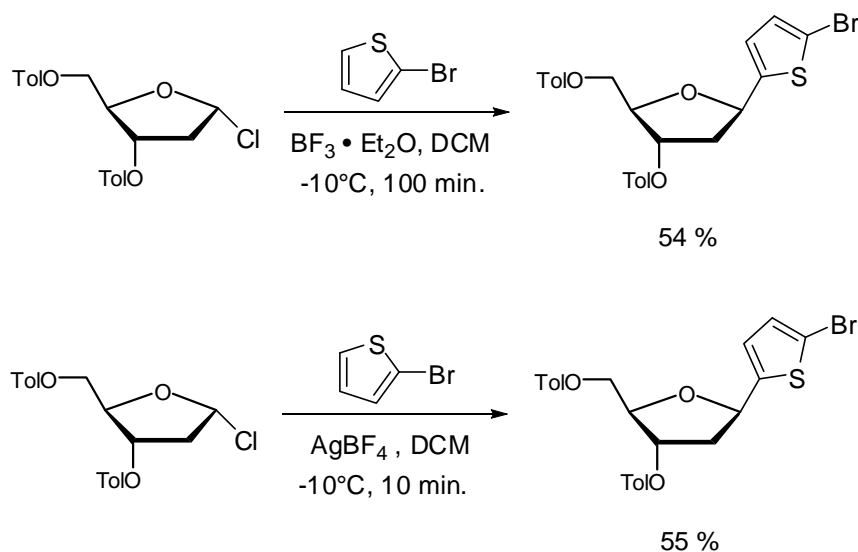

#### A: Using $\text{BF}_3 \cdot \text{Et}_2\text{O}$ as Lewis acid

$\text{BF}_3 \cdot \text{Et}_2\text{O}$  (598  $\mu\text{L}$ , 5.02 mmol) was added during 8 min to a dried flask containing a solution of the halogenol **1** (300 mg, 0.77 mmol) and 2-bromothiophene **3** (187  $\mu\text{L}$ , 1.93 mmol) in dry dichloromethane (10 mL) at  $-10^\circ\text{C}$  under argon, and the mixture was stirred for 100 min. at  $-10^\circ\text{C}$ . Then the reaction was quenched by saturated  $\text{Na}_2\text{CO}_3$ , extracted with chloroform (3x 50 mL), dried over  $\text{MgSO}_4$ , and solvents were evaporated under vacuum. The crude product was purified by flash chromatography on silica gel in gradient hexane to hexane/EtOAc (19.5/0.5) to give the desired product **4a** (87 mg, 22 %) followed by  $\alpha$ -anomer **5a** (86 mg, 22 %) as a colorless oil.

#### B: Using $\text{AgBF}_4$ as Lewis acid

$\text{AgBF}_4$  (490 mg, 2.50 mmol) was added in one portion to a dried flask containing a solution of the halogenol **1** (150 mg, 0.39 mmol) and 2-bromothiophene **3** (94  $\mu\text{L}$ , 0.97 mmol) in dry dichloromethane (5 mL) at  $-10^\circ\text{C}$  under argon. The reaction mixture was stirred 10 min. at  $-10^\circ\text{C}$ , quenched by saturated  $\text{Na}_2\text{CO}_3$ , extracted with chloroform (3x 50 mL), dried on  $\text{MgSO}_4$  and solvent was evaporated under vacuum. The crude product was purified by flash

chromatography on silica gel in gradient hexane to hexane/EtOAc (19.5/0.5) to give the desired product **4a** (108 mg, 55 %) followed by  $\alpha$ -anomer **5a** (28 mg, 14 %) as a colorless oil.

#### Isomerization of $\alpha$ -Anomer:

A mixture of BSA (109 mg, 0.69 mmol) and TFA (254  $\mu$ L, 3.31 mmol) was added to a solution of  $\alpha$ -anomer **5** (102 mg, 0.2 mmol) in dichloromethane (10 mL). The mixture was stirred at 40 °C for 22h and then poured onto ice containing NaHCO<sub>3</sub>. Product was extracted to EtOAc (2x30 mL) and chromatographed on silica gel eluting hexane to hexane/EtOAc (19.5/0.5) to give the mixture of desired product **4a** (25 mg, 25 %) and starting material **5a**.

**General procedure for catalytic hydrogenolysis of bromothiophene nucleosides:** To a solution of the nucleoside **4a** (500 mg, 0.97 mmol) in a mixture of THF/EtOH/H<sub>2</sub>O (10/10/1) (30 mL) at rt, 10% Pd/C (260 mg, 2.44 mmol) and Et<sub>3</sub>N (1 mL) were added. The flask was evacuated and then filled with H<sub>2</sub>. Then H<sub>2</sub> was bubbled through the solution at rt for 3-6 h. After the reaction was completed (checked by TLC), catalyst was filtered off and the solvents evaporated. The residue was chromatographed on silica gel in gradient hexane to hexane/EtOAc (9/1).

**1 $\beta$ -(Thiophen-2-yl)-1,2-dideoxy-3,5-di-*O*-toluoyl-D-ribofuranose (4b).** Prepared from **4a** (500 mg, 0.97 mmol) by the general procedure, reaction time 3 h. **4b** (400 mg, 95%) was obtained as a colorless oil. MS (FAB) *m/z* 437 (M + H); HRMS (FAB) for C<sub>25</sub>H<sub>25</sub>O<sub>5</sub>S: [M + H] calculated 437.1423, found 437.1416. <sup>1</sup>H NMR (600 MHz, CDCl<sub>3</sub>): 2.41 (s, 3H, CH<sub>3</sub>-Tol); 2.42 (ddd, 1H, *J*<sub>gem</sub> = 13.8, *J*<sub>2'b,1'</sub> = 10.8, *J*<sub>2'b,3'</sub> = 6.0, H-2'b); 2.43 (s, 3H, CH<sub>3</sub>-Tol); 2.58 (ddd, 1H, *J*<sub>gem</sub> = 13.8, *J*<sub>2'a,1'</sub> = 5.1, *J*<sub>2'a,3'</sub> = 1.1, H-2'a); 4.51 (td, 1H, *J*<sub>4',5'</sub> = 4.1, *J*<sub>4',3'</sub> = 2.0, H-4'); 4.59 and 4.62 (2  $\times$  d, 2H, *J*<sub>gem</sub> = 11.8, *J*<sub>5',4'</sub> = 4.1, H-5'); 5.51 (dd, 1H, *J*<sub>1',2'</sub> = 10.8, 5.1, H-1'); 5.62 (dddd, 1H, *J*<sub>3',2'</sub> = 6.0, 1.1, *J*<sub>3',4'</sub> = 2.0, *J*<sub>3',1'</sub> = 0.6, H-3'); 6.97 (dd, 1H, *J*<sub>4,5</sub> = 5.1, *J*<sub>4,3</sub> =

3.5, H-4); 7.06 (ddd, 1H,  $J_{3,4} = 3.5$ ,  $J_{3,5} = 1.3$ ,  $J_{3,1'} = 0.7$ , H-3); 7.24 (m, 2H, H-*m*-Tol); 7.26 (dd, 1H,  $J_{5,4} = 5.1$ ,  $J_{5,3} = 1.3$ , H-5); 7.27 (m, 2H, H-*m*-Tol); 7.97 (m, 4H, H-*o*-Tol).  $^{13}\text{C}$  NMR (151 MHz,  $\text{CDCl}_3$ ): 21.67 and 21.71 ( $\text{CH}_3$ -Tol); 41.9 ( $\text{CH}_2$ -2'); 64.6 ( $\text{CH}_2$ -5'); 76.85 ( $\text{CH}$ -1'); 77.1 ( $\text{CH}$ -3'); 82.9 ( $\text{CH}$ -4'); 124.95 ( $\text{CH}$ -3); 125.3 ( $\text{CH}$ -5); 126.6 ( $\text{CH}$ -4); 126.9 and 127.1 ( $\text{C}$ -*i*-Tol); 129.1 and 129.2 ( $\text{CH}$ -*m*-Tol); 129.7 and 129.75 ( $\text{CH}$ -*o*-Tol); 143.8 ( $\text{C}$ -*p*-Tol); 143.8 ( $\text{C}$ -2); 144.2 ( $\text{C}$ -*p*-Tol); 166.05 and 166.35 (CO). IR spectrum ( $\text{CCl}_4$ ): 3094, 3039, 1725, 1578, 1444, 1377, 1268, 1208, 1178, 1103, 1082, 1050, 939  $\text{cm}^{-1}$ .  $[\alpha]_{\text{D}}^{20} -14.5$  ( $c$  2.20,  $\text{CHCl}_3$ ).

**1 $\beta$ -(Thiophen-2-yl)-1,2-dideoxy-3,5-di-*O*-(*tert*-butyldimethylsilyl)-D-ribofuranose (7b).**

Prepared from **7a** (363 mg, 0.72 mmol) by the general procedure, reaction time 6 h. **7b** (300 mg, 98%) was obtained as a colorless oil. MS (FAB)  $m/z$  429 ( $\text{M} + \text{H}$ ); HRMS (FAB) for  $\text{C}_{21}\text{H}_{41}\text{O}_3\text{SSi}_2$ :  $[\text{M} + \text{H}]$  calculated 429.2315, found 429.2318.  $^1\text{H}$  NMR (500 MHz,  $\text{CDCl}_3$ ): 0.07 and 0.10 ( $4 \times \text{s}$ ,  $4 \times 3\text{H}$ ,  $\text{CH}_3\text{Si}$ ); 0.905 and 0.911 ( $2 \times \text{s}$ ,  $2 \times 9\text{H}$ ,  $(\text{CH}_3)_3\text{C}$ ); 2.04 (ddd, 1H,  $J_{\text{gem}} = 12.7$ ,  $J_{2'b,1'} = 10.5$ ,  $J_{2'b,3'} = 5.1$ , H-2'b); 2.16 (ddd, 1H,  $J_{\text{gem}} = 12.7$ ,  $J_{2'a,1'} = 5.1$ ,  $J_{2'a,3'} = 1.4$ , H-2'a); 3.53 (dd, 1H,  $J_{\text{gem}} = 10.6$ ,  $J_{5'b,4'} = 6.5$ , H-5'b); 3.73 (dd, 1H,  $J_{\text{gem}} = 10.6$ ,  $J_{5'a,4'} = 4.0$ , H-5'a); 3.94 (ddd, 1H,  $J_{4'5'} = 6.5$ , 4.0,  $J_{4'3'} = 1.7$ , H-4'); 4.44 (dddd, 1H,  $J_{3'2'} = 5.1$ , 1.4,  $J_{3'4'} = 1.7$ ,  $J_{3'1'} = 0.7$ , H-3'); 5.38 (dd, 1H,  $J_{1'2'} = 10.5$ , 5.1, H-1'); 6.95 (dd, 1H,  $J_{4,5} = 5.0$ ,  $J_{4,3} = 3.5$ , H-4); 7.00 (ddd, 1H,  $J_{3,4} = 3.5$ ,  $J_{3,5} = 1.3$ ,  $J_{3,1'} = 0.7$ , H-3); 7.23 (dd, 1H,  $J_{5,4} = 5.0$ ,  $J_{5,3} = 1.3$ , H-5).  $^{13}\text{C}$  NMR (125.7 MHz,  $\text{CDCl}_3$ ): -5.45, -5.4 and -4.7 ( $\text{CH}_3\text{Si}$ ); 18.0 and 18.4 ( $\text{C}(\text{CH}_3)_3$ ); 25.8 and 25.95 ( $(\text{CH}_3)_3\text{C}$ ); 44.3 ( $\text{CH}_2$ -2'); 63.9 ( $\text{CH}_2$ -5'); 74.4 ( $\text{CH}$ -3'); 76.0 ( $\text{CH}$ -1'); 88.1 ( $\text{CH}$ -4'); 124.4 ( $\text{CH}$ -3); 124.6 ( $\text{CH}$ -5); 126.45 ( $\text{CH}$ -4); 145.6 ( $\text{C}$ -2). IR spectrum ( $\text{CCl}_4$ ): 2956, 2930, 1731, 1463, 1494, 1375, 1257, 1187, 1092, 1029, 969, 939  $\text{cm}^{-1}$ .  $[\alpha]_{\text{D}}^{20} +3.1$  ( $c$  4.53,  $\text{CHCl}_3$ ).

## 2) Alkylations

### Scheme S2:

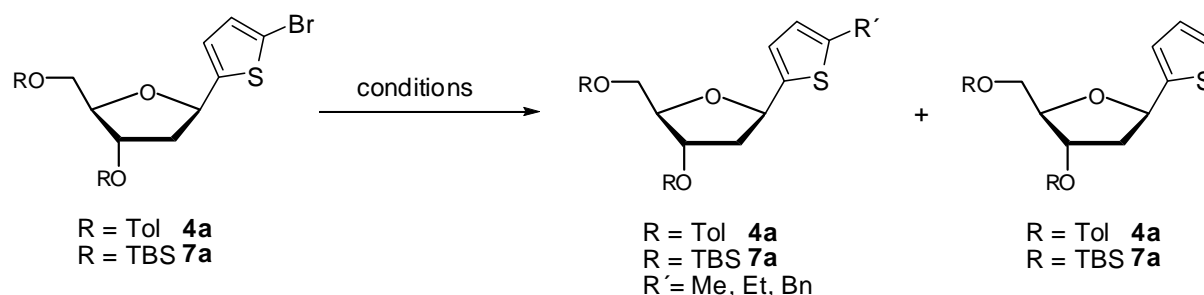

### a) Methylation

#### 1 $\beta$ -(5-Methylthiophen-2-yl)-1,2-dideoxy-3,5-di-*O*-toluoyl-D-ribofuranose (**4c**).

##### **A:** using $\text{Me}_3\text{Al}$ :

A solution of  $\text{Me}_3\text{Al}$  (980  $\mu\text{L}$ , 2M in toluene, 1.96 mmol) in THF (15 mL) was added dropwise to a vigorously stirred solution of **4a** (505 mg, 0.98 mmol) and  $\text{Pd}(\text{PPh}_3)_4$  (57 mg, 0.05 mmol) in dry THF (18 mL). The mixture was stirred at 105  $^\circ\text{C}$  for 12h and then worked up by pouring into saturated  $\text{NaH}_2\text{PO}_4$  (40 mL) and extracted to EtOAc (3x30mL). Crude product was chromatographed on silica gel in gradient hexane to hexane/EtOAc (19/0.5) to give inseparable mixture of the **4c/4b** (1:1) (209 mg, 24%/24%) as colorless oil.

##### **B:** using $\text{MeZnCl}$ :

A solution of  $\text{ZnCl}_2$  (4.57 mL, 0.5 M in THF, 2.33 mmol) was added dropwise to a stirred solution of  $\text{MeMgCl}$  (1.3 mL, 1.5 M in THF, 1.94 mmol) in THF (5 mL) during 5 min. at 0  $^\circ\text{C}$  under Ar, the stirring was continued for 20 min at 0  $^\circ\text{C}$ . This solution was transferred into **4a** (202 mg, 0.39 mmol),  $\text{Pd}_2\text{dba}_3$  (18 mg, 0.02 mmol) and bdtbp (12 mg, 0.04 mmol) in THF (5 mL). The resulting reaction mixture was stirred at r.t. for 30 min. then at 70  $^\circ\text{C}$  for 24h. The mixture was cooled to rt and worked up with  $\text{NH}_4\text{Cl}$  solution (30 mL), and product was extracted with EtOAc (3 x 20 mL). Evaporation of the organic phase followed by a column

chromatography on silica gel in gradient hexane to hexane/EtOAc (19.5/0.5) afforded the inseparable mixture of products **4c/4b** (2:1) (139 mg, 51%/29%) as colorless oil.

**C:** using *MeB(OH)<sub>2</sub>*:

**1 $\beta$ -(5-Methylthiophen-2-yl)-1,2-dideoxy-3,5-di-*O*-toluoyl-D-ribofuranose (4c).** Dry toluene (15 mL) was added to an argon-purged flask containing **4a** (500 mg, 0.97 mmol), K<sub>2</sub>CO<sub>3</sub> (200 mg, 1.44 mmol), methylboronic acid (116 mg, 1.94 mmol) and Pd(PPh<sub>3</sub>)<sub>4</sub> (54 mg, 0.05 mmol), and the mixture was stirred under Ar at 115 °C for 43 h. After the mixture was cooled to rt and filtered through celite. Evaporation of the solvent, followed by a column chromatography on silica gel in gradient hexane to hexane/toluene (9.7/0.3) afforded the mixture of products **4c/4b** (6:1) (260 mg, 60%) as a colorless oil. Compound **4c**: MS (FAB) *m/z* 451 (M + H); HRMS (FAB) for C<sub>26</sub>H<sub>27</sub>O<sub>5</sub>S: [M + H] calculated 451.1579, found 451.1585. <sup>1</sup>H NMR (500 MHz, CDCl<sub>3</sub>): 2.40 (ddd, 1H, *J*<sub>gem</sub> = 13.8, *J*<sub>2'b,1'</sub> = 10.8, *J*<sub>2'b,3'</sub> = 6.0, H-2'b); 2.41 and 2.43 (2 × s, 2 × 3H, CH<sub>3</sub>-Tol); 2.44 (d, 3H, <sup>4</sup>*J* = 1.1, CH<sub>3</sub>); 2.53 (ddd, 1H, *J*<sub>gem</sub> = 13.8, *J*<sub>2'a,1'</sub> = 5.0, *J*<sub>2'a,3'</sub> = 1.2, H-2'a); 4.48 (td, 1H, *J*<sub>4',5'</sub> = 4.2, *J*<sub>4',3'</sub> = 2.0, H-4'); 4.56 and 4.60 (2 × dd, 2H, *J*<sub>gem</sub> = 11.7, *J*<sub>5',4'</sub> = 4.2, H-5'); 5.41 (dd, 1H, *J*<sub>1',2'</sub> = 10.8, 5.0, H-1'); 5.60 (dddd, 1H, *J*<sub>3',2'</sub> = 6.0, 1.2, *J*<sub>3',4'</sub> = 2.0, *J*<sub>3',1'</sub> = 0.5, H-3'); 6.60 (dq, 1H, *J*<sub>4,3</sub> = 3.4, <sup>4</sup>*J* = 1.1, H-4); 6.85 (d, 1H, *J*<sub>3,4</sub> = 3.4, H-3); 7.24 and 7.26 (2 × m, 2 × 2H, H-*m*-Tol); 7.96 and 7.97 (2 × m, 2 × 2H, H-*o*-Tol). <sup>13</sup>C NMR (125.7 MHz, CDCl<sub>3</sub>): 15.4 (CH<sub>3</sub>); 21.65 and 21.7 (CH<sub>3</sub>-Tol); 41.5 (CH<sub>2</sub>-2'); 64.6 (CH<sub>2</sub>-5'); 77.0 (CH-1'); 77.0 (CH-3'); 82.7 (CH-4'); 124.6 (CH-4); 125.1 (CH-3); 126.9 and 127.15 (C-*i*-Tol); 129.1 and 129.2 (CH-*m*-Tol); 129.7 and 129.8 (CH-*o*-Tol); 140.0 (C-5); 141.1 (C-2); 143.7 and 144.1 (C-*p*-Tol); 166.0 and 166.3 (CO).

**1 $\beta$ -(5-Methylthiophen-2-yl)-1,2-dideoxy-3,5-di-*O*-(*tert*-butyldimethylsilyl)-D-ribofuranose (7c).**

using *MeB(OH)<sub>2</sub>*:

Dry toluene (20 mL) was added to an argon-purged flask containing the **7a** (700 mg, 1.36 mmol), K<sub>2</sub>CO<sub>3</sub> (286 mg, 2.1 mmol), methylboronic acid (165 mg, 2.76 mmol), and Pd(PPh<sub>3</sub>)<sub>4</sub> (80 mg, 0.07 mmol). The mixture was stirred under Ar at 70 °C for 19h. After the mixture was cooled to rt and filtered through cellite. Evaporation of the organic phase followed by a column chromatography on silica gel in gradient hexane to hexane/toluene (19.5/0.5) afforded the inseparable mixture of products **7c/7b** (9:1) (260 mg, 66%/7%) as colorless oil. Compound **7c**: MS (FAB) *m/z* 443 (M + H); C<sub>22</sub>H<sub>43</sub>O<sub>3</sub>SSi<sub>2</sub> [M + H] calculated 443.2471, found 443.2482. <sup>1</sup>H NMR (500 MHz, CDCl<sub>3</sub>): 0.08 and 0.09 (2 × s, 2 × 6H, CH<sub>3</sub>Si); 0.908 and 0.909 (2 × s, 2 × 9H, (CH<sub>3</sub>)<sub>3</sub>C); 1.98 (ddd, 1H, *J*<sub>gem</sub> = 12.7, *J*<sub>2'b,1'</sub> = 10.3, *J*<sub>2'b,3'</sub> = 5.2, H-2'b); 2.14 (ddd, 1H, *J*<sub>gem</sub> = 12.7, *J*<sub>2'a,1'</sub> = 5.3, *J*<sub>2'a,3'</sub> = 1.6, H-2'a); 3.52 (dd, 1H, *J*<sub>gem</sub> = 10.8, *J*<sub>5'b,4'</sub> = 6.4, H-5'b); 3.71 (dd, 1H, *J*<sub>gem</sub> = 10.8, *J*<sub>5'a,4'</sub> = 4.0, H-5'a); 3.92 (ddd, 1H, *J*<sub>4',5'</sub> = 6.4, 4.0, *J*<sub>4',3'</sub> = 1.8, H-4'); 4.42 (dddd, 1H, *J*<sub>3',2'</sub> = 5.2, 1.6, *J*<sub>3',4'</sub> = 1.8, *J*<sub>3',1'</sub> = 0.6, H-3'); 5.28 (dddd, 1H, *J*<sub>1',2'</sub> = 10.3, 5.3, *J*<sub>1',3</sub> = 0.8, *J*<sub>1',3'</sub> = 0.6, H-1'); 6.73 (dd, 1H, *J*<sub>3,4</sub> = 3.8, *J*<sub>3,1'</sub> = 0.8, H-3); 6.88 (d, 1H, *J*<sub>4,3</sub> = 3.8, H-4). <sup>13</sup>C NMR (125.7 MHz, CDCl<sub>3</sub>): -5.45, -5.4 and -4.7 (CH<sub>3</sub>Si); 18.0 and 18.4 (C(CH<sub>3</sub>)<sub>3</sub>); 25.8 and 25.95 ((CH<sub>3</sub>)<sub>3</sub>C); 44.15 (CH<sub>2</sub>-2'); 63.8 (CH<sub>2</sub>-5'); 74.3 (CH-3'); 76.2 (CH-1'); 88.2 (CH-4'); 111.4 (C-5); 124.45 (CH-3); 129.2 (CH-4); 147.7 (C-2).

**1β-(Thiophen-2-yl)-1,2-dideoxy-3,5-di-*O*-(*tert*-butyldimethylsilyl)-D-ribofuranose (7b).**

MS (FAB) *m/z* 429 (M + H); C<sub>21</sub>H<sub>41</sub>O<sub>3</sub>SSi<sub>2</sub> : [M + H] calculated, 429.2315; found, 429.2322. <sup>1</sup>H NMR (500 MHz, CDCl<sub>3</sub>): 0.07 and 0.10 (4 × s, 4 × 3H, CH<sub>3</sub>Si); 0.905 and 0.911 (2 × s, 2 × 9H, (CH<sub>3</sub>)<sub>3</sub>C); 2.04 (ddd, 1H, *J*<sub>gem</sub> = 12.7, *J*<sub>2'b,1'</sub> = 10.5, *J*<sub>2'b,3'</sub> = 5.1, H-2'b); 2.16 (ddd, 1H, *J*<sub>gem</sub> = 12.7, *J*<sub>2'a,1'</sub> = 5.1, *J*<sub>2'a,3'</sub> = 1.4, H-2'a); 3.53 (dd, 1H, *J*<sub>gem</sub> = 10.6, *J*<sub>5'b,4'</sub> = 6.5, H-5'b); 3.73 (dd, 1H, *J*<sub>gem</sub> = 10.6, *J*<sub>5'a,4'</sub> = 4.0, H-5'a); 3.94 (ddd, 1H, *J*<sub>4',5'</sub> = 6.5, 4.0, *J*<sub>4',3'</sub> = 1.7, H-4'); 4.44 (dddd, 1H, *J*<sub>3',2'</sub> = 5.1, 1.4, *J*<sub>3',4'</sub> = 1.7, *J*<sub>3',1'</sub> = 0.7, H-3'); 5.38 (dd, 1H, *J*<sub>1',2'</sub> = 10.5,



5.1, H-1'); 6.95 (dd, 1H,  $J_{4,5} = 5.0$ ,  $J_{4,3} = 3.5$ , H-4); 7.00 (ddd, 1H,  $J_{3,4} = 3.5$ ,  $J_{3,5} = 1.3$ ,  $J_{3,1'} = 0.7$ , H-3); 7.23 (dd, 1H,  $J_{5,4} = 5.0$ ,  $J_{5,3} = 1.3$ , H-5).  $^{13}\text{C}$  NMR (125.7 MHz,  $\text{CDCl}_3$ ): -5.45, -5.4 and -4.7 ( $\text{CH}_3\text{Si}$ ); 18.0 and 18.4 ( $\text{C}(\text{CH}_3)_3$ ); 25.8 and 25.95 ( $(\text{CH}_3)_3\text{C}$ ); 44.3 ( $\text{CH}_2\text{-}2'$ ); 63.9 ( $\text{CH}_2\text{-}5'$ ); 74.4 ( $\text{CH-}3'$ ); 76.0 ( $\text{CH-}1'$ ); 88.1 ( $\text{CH-}4'$ ); 124.4 ( $\text{CH-}3$ ); 124.6 ( $\text{CH-}5$ ); 126.45 ( $\text{CH-}4$ ); 145.6 ( $\text{C-}2$ ).

## b) Ethylation

### **1 $\beta$ -(5-Ethylthiophen-2-yl)-1,2-dideoxy-3,5-di-*O*-toluoyl-D-ribofuranose (4d).**

#### **A: using $\text{Et}_3\text{Al}$ :**

A solution of  $\text{Et}_3\text{Al}$  (1.96 mL, 1M in hexane, 1.96 mmol) in THF was dropwise added to a vigorously stirred solution of **4a** (505 mg, 0.98 mmol) and  $\text{Pd}(\text{PPh}_3)_4$  (57 mg, 0.05 mmol) in THF (18 mL). The mixture was stirred at 105 °C for 12h. After the mixture was cooled to rt and filtered through cellite. Evaporation of the organic phase followed by a column chromatography on silica gel in gradient hexane to hexane/EtOAc (19/0.5) gave mixture of the **4a/4b** (1:4) (257 mg, 12%/46%) as colorless oil.

#### **B: using $\text{EtZnCl}$ :**

**1 $\beta$ -(5-Ethylthiophen-2-yl)-1,2-dideoxy-3,5-di-*O*-(*tert*-butyldimethylsilyl)-D-ribofuranose (7d).** A solution of  $\text{ZnCl}_2$  (5.7 mL, 0.5 M in THF, 2.84 mmol) was added dropwise to a stirred solution of  $\text{EtMgBr}$  (2.4 mL, 1 M in THF, 2.36 mmol) in THF (3 mL) during 5 min at 0 °C under Ar and the stirring was continued for 25 min at 0 °C. This solution was transferred into a solution of **7a** (400 mg, 0.79 mmol),  $\text{Pd}_2\text{dba}_3$  (36 mg, 0.04 mmol) and  $\text{bdtbp}$  (24 mg, 0.08 mmol) in THF (5 mL) and the resulting reaction mixture was stirred at r.t. for 10 min and then at 85 °C for 23 h. The mixture was cooled to rt, poured into saturated  $\text{NH}_4\text{Cl}$  solution (20 mL), filtered through cellite and the products were extracted with EtOAc

(3x20 mL). Evaporation of the organic phase followed by a column chromatography on silica gel in gradient hexane to hexane/EtOAc (9.7/0.3) afforded the mixture of products **7d/7b** (4:1) (330 mg, 93%) as a colorless oil. Compound **7d**: MS (FAB)  $m/z$  457 ( $M + H$ ); HRMS (FAB) for  $C_{23}H_{45}O_3SSi_2$ : [ $M + H$ ] calculated 457.2628, found 457.2623.  $^1H$  NMR (500 MHz,  $CDCl_3$ ): 0.068, 0.069, 0.089 and 0.090 ( $4 \times s$ ,  $4 \times 3H$ ,  $CH_3Si$ ); 0.905 and 0.907 ( $2 \times s$ ,  $2 \times 9H$ ,  $(CH_3)_3C$ ); 1.28 (t, 3H,  $J_{vic} = 7.6$ ,  $CH_3CH_2$ ); 2.03 (ddd, 1H,  $J_{gem} = 12.7$ ,  $J_{2'b,1'} = 10.4$ ,  $J_{2'b,3'} = 5.0$ , H-2'b); 2.12 (ddd, 1H,  $J_{gem} = 12.7$ ,  $J_{2'a,1'} = 5.2$ ,  $J_{2'a,3'} = 1.5$ , H-2'a); 2.80 (qd, 2H,  $J_{vic} = 7.6$ ,  $^4J = 1.0$ ,  $CH_2CH_3$ ); 3.50 (dd, 1H,  $J_{gem} = 10.6$ ,  $J_{5'b,4'} = 6.9$ , H-5'b); 3.72 (dd, 1H,  $J_{gem} = 10.6$ ,  $J_{5'a,4'} = 4.1$ , H-5'a); 3.91 (ddd, 1H,  $J_{4',5'} = 6.9$ , 4.1,  $J_{4',3'} = 1.5$ , H-4'); 4.43 (dtd, 1H,  $J_{3',2'} = 5.0$ , 1.5,  $J_{3',4'} = 1.5$ ,  $J_{3',1'} = 0.6$ , H-3'); 5.30 (dddd, 1H,  $J_{1',2'} = 10.4$ , 5.2,  $J_{1',3} = 0.7$ ,  $J_{1',3'} = 0.6$ , H-1'); 6.61 (dt, 1H,  $J_{4,3} = 3.4$ ,  $^4J = 1.0$ , H-4); 6.81 (dd, 1H,  $J_{3,4} = 3.8$ ,  $J_{3,1'} = 0.7$ , H-3).  $^{13}C$  NMR (125.7 MHz,  $CDCl_3$ ): -5.44, -5.36 and -4.7 ( $CH_3Si$ ); 15.9 ( $CH_3CH_2$ ); 18.0 and 18.4 ( $C(CH_3)_3$ ); 23.6 ( $CH_2CH_3$ ); 25.8 and 26.0 ( $(CH_3)_3C$ ); 43.9 ( $CH_2-2'$ ); 63.95 ( $CH_2-5'$ ); 74.45 ( $CH-3'$ ); 76.2 ( $CH-1'$ ); 88.0 ( $CH-4'$ ); 122.6 ( $CH-4$ ); 124.4 ( $CH-3$ ); 142.5 (C-2); 147.1 (C-5).

### c) Benzylation

**1 $\beta$ -(5-Benzylthiophen-2-yl)-1,2-dideoxy-D-ribofuranose (6e).** A solution of  $BnMgCl$  (780  $\mu L$ , 2 M in THF, 1.55 mmol) was added dropwise to a stirred solution of **4a** (400 mg, 0.78 mmol) and  $NiCl_2(dppp)$  (42 mg, 0.08 mmol) in THF (4 mL) during 40 min at  $-20^\circ C$  under Ar. The stirring was continued for 10 min to reach rt and then the mixture was stirred at  $85^\circ C$  for 14 h. The mixture was cooled to rt and then filtered through celite, extracted to EtOAc (20 mL) and evaporated. Crude mixture was treated with NaOMe (1M solution) in MeOH at rt for 24 h and the residue after evaporation of the solvent was flash-chromatographed on silica gel in gradient EtOAc to EtOAc/MeOH (8/2) to give **6e** (72 mg,

32% after two steps) followed by **6b** (26 mg, 17%) and **6a** (36 mg, 17%) as yellow oils. Compound **6e** was re-purified by flash chromatography on reverse phase and crystallized from isopropanol/heptan to obtain yellow crystals, mp 59-61 °C. MS (FAB)  $m/z$  291 ( $M + H$ ); HRMS (FAB) for  $C_{16}H_{19}O_3S$ :  $[M + H]$  calculated 291.1055, found 291.1046.  $^1H$  NMR (500 MHz,  $CD_3OD$ ): 2.06 (ddd, 1H,  $J_{gem} = 13.1$ ,  $J_{2'b,1'} = 10.2$ ,  $J_{2'b,3'} = 5.8$ , H-2'b); 2.17 (ddd, 1H,  $J_{gem} = 13.1$ ,  $J_{2'a,1'} = 5.4$ ,  $J_{2'a,3'} = 1.8$ , H-2'a); 3.54 (dd, 1H,  $J_{gem} = 11.6$ ,  $J_{5'b,4'} = 5.5$ , H-5'b); 3.58 (dd, 1H,  $J_{gem} = 11.6$ ,  $J_{5'a,4'} = 5.3$ , H-5'a); 3.87 (ddd, 1H,  $J_{4',5'} = 5.5$ , 5.3,  $J_{4',3'} = 2.4$ , H-4'); 4.09 (bs, 2H,  $CH_2Ph$ ); 4.29 (dddd, 1H,  $J_{3',2'} = 5.8$ , 1.8,  $J_{3',4'} = 2.4$ ,  $J_{3',1'} = 0.6$ , H-3'); 5.26 (dddd, 1H,  $J_{1',2'} = 10.2$ , 5.4,  $J_{1',3} = 0.8$ ,  $J_{1',3'} = 0.6$ , H-1'); 6.67 (dt, 1H,  $J_{4,3} = 3.5$ ,  $^4J = 1.0$ , H-4); 6.85 (dd, 1H,  $J_{3,4} = 3.5$ ,  $J_{3,1'} = 0.8$ , H-3); 7.19 (m, 1H, H-*p*-Ph); 7.22 (m, 2H, H-*o*-Ph); 7.27 (m, 1H, H-*m*-Ph).  $^{13}C$  NMR (125.7 MHz,  $CD_3OD$ ): 37.15 ( $CH_2Ph$ ); 44.6 ( $CH_2-2'$ ); 64.1 ( $CH_2-5'$ ); 74.3 ( $CH-3'$ ); 77.6 ( $CH-1'$ ); 89.05 ( $CH-4'$ ); 125.5 ( $CH-4$ ); 125.7 ( $CH-3$ ); 127.45 ( $CH-p-Ph$ ); 129.5 ( $CH-m-Ph$ ); 129.6 ( $CH-o-Ph$ ); 141.9 ( $C-i-Ph$ ); 144.9 ( $C-2$ ); 145.6 ( $C-5$ ). IR spectrum (KBr): 3409, 3083, 3060, 2929, 2998, 2842, 1698, 1632, 1489, 1436, 1338, 1217, 1055, 1036, 968  $cm^{-1}$ .  $[\alpha]_D^{20}$  -12.5 ( $c$  2.77, MeOH). Anal. Calcd  $C_{16}H_{18}O_3S$  (290.4): C, 66.18; H, 6.25; found: C, 65.85; H, 6.25.

### 3) Amination

**Scheme S3:**

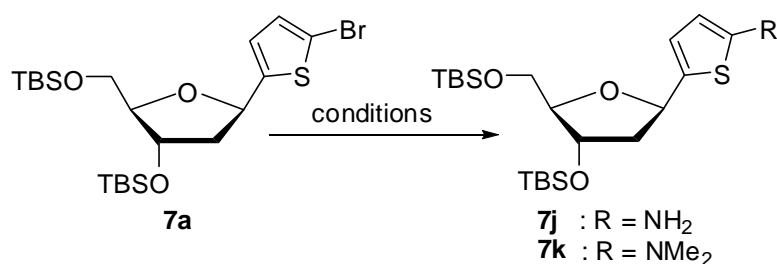

**Attempted amination of 7a.** LiN(SiMe<sub>3</sub>)<sub>2</sub> (0.36 mL, 1 M solution in THF, 0.36 mmol) was added to a dried argon purged flask containing **7a** (100 mg, 0.20 mmol), tri-*tert*-butylphosphonium tetrafluoroborate (6.9 mg, 0.24 mol), and Pd<sub>2</sub>(dba)<sub>3</sub> (11.9 mg, 6.6 mol %), and the mixture was stirred at rt for 24h and then 24h. at 80 °C. The reaction was quenched by the addition of Et<sub>2</sub>O and 4 drops of 2 M aqueous solution of HCl and worked up. Chromatography on silica gel in gradient hexane to hexane / EtOAc to give only product of degradation as a yellow oil.

**1β-(5-Dimethylaminothiophen-2-yl)-1,2-dideoxy-3,5-di-O-(*t*-butyldimethylsilyl)-D-ribofuranose (7k).** A solution of Pd<sub>2</sub>dba<sub>3</sub> (63 mg, 5 mol %), (2-biphenyl)-di-*tert*-butylphosphine (62 mg, 15 mol %) in toluene (9 mL) was added to an argon-purged dry flask containing **7a** (700 mg, 1.38 mmol), sodium *tert*-butoxide (663 mg, 6.89 mmol) in toluene (9 mL), and mixture was stirring for 2 min. then Me<sub>2</sub>NH.THF (3.44 mL, 2 M solution in THF, 6.89 mmol) was added in one portion. The mixture was stirred at 70 °C for 7h. After was reaction quenched by saturated NH<sub>4</sub>Cl (30 ml) and, extracted EtOAc (2x 25 mL) and mixture was dried on MgSO<sub>4</sub>, and solvent were evaporated under vacuum. and crude product **7k** was chromatographed on silica gel in gradient hexane to hexane / EtOAc to give **7k** (314 mg, 49 %) as a yellow oil which was unstable and spontaneously degraded. Compound **7k** : C<sub>23</sub>H<sub>45</sub>NO<sub>3</sub>SSi<sub>2</sub> : [M + H] calculated 472.2737, found 472.2728. <sup>1</sup>H NMR (500 MHz, CDCl<sub>3</sub>): 0.069, 0.074, 0.086 and 0.087 (4 × s, 4 × 3H, CH<sub>3</sub>Si); 0.90 and 0.91 (2 × s, 2 × 9H, (CH<sub>3</sub>)<sub>3</sub>C); 2.02 (ddd, 1H, *J*<sub>gem</sub> = 12.7, *J*<sub>2'b,1'</sub> = 10.0, *J*<sub>2'b,3'</sub> = 4.9, H-2'b); 2.05 (ddd, 1H, *J*<sub>gem</sub> = 12.7, *J*<sub>2'a,1'</sub> = 5.6, *J*<sub>2'a,3'</sub> = 1.5, H-2'a); 2.87 (s, 6H, CH<sub>3</sub>N); 3.50 (dd, 1H, *J*<sub>gem</sub> = 10.6, *J*<sub>5'b,4'</sub> = 6.8, H-5'b); 3.71 (dd, 1H, *J*<sub>gem</sub> = 10.6, *J*<sub>5'a,4'</sub> = 4.0, H-5'a); 3.88 (ddd, 1H, *J*<sub>4'5'</sub> = 6.8, 4.0, *J*<sub>4'3'</sub> = 1.7, H-4'); 4.41 (dddd, 1H, *J*<sub>3'2'</sub> = 4.9, 1.5, *J*<sub>3'4'</sub> = 1.7, *J*<sub>3'1'</sub> = 0.7, H-3'); 5.22 (ddt, 1H, *J*<sub>1'2'</sub> = 10.0, 5.6, *J*<sub>1'3</sub> = *J*<sub>1'3'</sub> = 0.7, H-1'); 5.72 (d, 1H, *J*<sub>4,3</sub> = 3.7, H-4); 6.68 (dd, 1H, *J*<sub>3,4</sub> = 3.7, *J*<sub>3,1'</sub> = 0.7,

H-3).  $^{13}\text{C}$  NMR (125.7 MHz,  $\text{CDCl}_3$ ): -5.42, -5.34 and -4.66 ( $\text{CH}_3\text{Si}$ ); 18.03 and 18.38 ( $\text{C}(\text{CH}_3)_3$ ); 25.84 and 25.98 ( $(\text{CH}_3)_3\text{C}$ ); 43.08 ( $\text{CH}_3\text{N}$ ); 43.48 ( $\text{CH}_2\text{-}2'$ ); 64.06 ( $\text{CH}_2\text{-}5'$ ); 74.49 ( $\text{CH-}3'$ ); 76.63 ( $\text{CH-}1'$ ); 87.75 ( $\text{CH-}4'$ ); 101.75 ( $\text{CH-}4$ ); 124.76 ( $\text{CH-}3$ ); 129.47 ( $\text{C-}2$ ); 159.29 ( $\text{C-}5$ ).

#### 4) Stille couplings

**General procedure for the Stille cross-coupling reaction:** 2-(Tributylstannyl)thiophene (1.2-5 equiv.) was added dropwise under argon to a stirred solution of **4a** (1 equiv.) and  $\text{PdCl}_2\text{dppf}$  (5 mol. %) in DMF (5.0 mL). The mixture was stirred at 100-120 °C for 16-22 h. Crude reaction mixture was diluted with EtOAc (15 mL), filtered through celite, washed with 2M HCl and brine. The water layers were extracted with EtOAc (3x20 mL). Then the collected organic layers were dried over  $\text{MgSO}_4$  and solvents were evaporated under vacuum. The crude product was chromatographed on silica gel in gradient hexane to hexane / EtOAc (9.7/0.3).

**1 $\beta$ -[5-(Thiophen-2-yl)thiophen-2-yl]-1,2-dideoxy-3,5-di-*O*-toluoyl-D-ribofuranose (4g).** Prepared from **4a** (623 mg, 1.21 mmol) and 2-(tributylstannyl)thiophene (1.90 mL, 6 mmol), by the general procedure (110 °C, 16 h). Compound **4g** (560 mg, 90%) was obtained as a yellow oil. MS (FAB)  $m/z$  519 ( $\text{M} + \text{H}$ ); HRMS (FAB) for  $\text{C}_{29}\text{H}_{27}\text{O}_5\text{S}_2$ : [ $\text{M} + \text{H}$ ] calculated 519.1222, found 519.1281.  $^1\text{H}$  NMR (600 MHz,  $\text{CDCl}_3$ ): 2.41 (s, 3H,  $\text{CH}_3\text{-Tol}$ ); 2.42 (ddd, 1H,  $J_{\text{gem}} = 13.8$ ,  $J_{2'b,1'} = 10.7$ ,  $J_{2'b,3'} = 5.9$ , H-2'b); 2.44 (s, 3H,  $\text{CH}_3\text{-Tol}$ ); 2.59 (ddd, 1H,  $J_{\text{gem}} = 13.8$ ,  $J_{2'a,1'} = 5.1$ ,  $J_{2'a,3'} = 1.2$ , H-2'a); 4.51 (td, 1H,  $J_{4',5'} = 4.2$ , 3.8,  $J_{4',3'} = 1.9$ , H-4'); 4.61 (dd, 1H,  $J_{\text{gem}} = 11.8$ ,  $J_{5'b,4'} = 3.8$ , H-5'b); 4.64 (dd, 1H,  $J_{\text{gem}} = 11.8$ ,  $J_{5'a,4'} = 4.2$ , H-5'a); 5.46 (ddt, 1H,  $J_{1',2'} = 10.7$ , 5.1,  $J_{1',3} = 0.7$ ,  $J_{1',3'} = 0.6$ , H-1'); 5.63 (dddd, 1H,  $J_{3',2'} =$

5.9, 1.2,  $J_{3',4'} = 1.9$ ,  $J_{3',1'} = 0.6$ , H-3'); 6.95 (dd, 1H,  $J_{3,4} = 3.6$ ,  $J_{3,1'} = 0.7$ , H-3); 6.99 (dd, 1H,  $J_{4,5} = 5.1$ ,  $J_{4,3} = 3.6$ , H-4-thienyl); 7.00 (d, 1H,  $J_{4,3} = 3.6$ , H-4); 7.05 (dd, 1H,  $J_{3,4} = 3.6$ ,  $J_{3,5} = 1.2$ , H-3-thienyl); 7.20 (dd, 1H,  $J_{5,4} = 5.1$ ,  $J_{5,3} = 1.2$ , H-5-thienyl); 7.24 and 7.27 ( $2 \times m$ ,  $2 \times 2H$ , H-*m*-Tol); 7.97 and 7.99 ( $2 \times m$ ,  $2 \times 2H$ , H-*o*-Tol).  $^{13}C$  NMR (151 MHz,  $CDCl_3$ ): 21.69 and 21.73 ( $CH_3$ -Tol); 41.8 ( $CH_2$ -2'); 64.5 ( $CH_2$ -5'); 77.0 (CH-1'); 77.1 (CH-3'); 83.0 (CH-4'); 123.1 (CH-4); 123.7 (CH-3-thienyl); 124.4 (CH-5-thienyl); 125.6 (CH-3); 126.8 and 127.1 (C-*i*-Tol); 127.7 (CH-4-thienyl); 129.1 and 129.2 (CH-*m*-Tol); 129.7 and 129.8 (CH-*o*-Tol); 137.28 and 137.29 (C-5 and C-2-thienyl); 142.8 (C-2); 143.8 and 144.2 (C-*p*-Tol); 166.05 and 166.4 (CO). IR spectrum (KBr): 3073, 1718, 1612, 1270, 1106, 1021  $cm^{-1}$ .  $[\alpha]^{20}_D = -104$  (*c* 2.23,  $CHCl_3$ ).

**1 $\beta$ -[5-(Furan-2-yl)thiophen-2-yl]-1,2-dideoxy-3,5-di-3,5-di-*O*-toluoyl-D-ribofuranose (4h).** Prepared from **4a** (773 mg, 1.5 mmol) and 2-(tributylstannyl)furan (570  $\mu L$ , 1.80 mmol) by the general procedure (120  $^{\circ}C$ , 22 h). **4h** (672 mg, 89%) was obtained as a yellow oil. MS (FAB)  $m/z$  503 ( $M + H$ ); HRMS (FAB) for  $C_{29}H_{27}O_6S$ :  $[M + H]$  calculated 503.1528, found 503.1520.  $^1H$  NMR (500 MHz,  $CDCl_3$ ): 2.40 (s, 3H,  $CH_3$ -Tol); 2.41 (ddd, 1H,  $J_{gem} = 13.8$ ,  $J_{2'b,1'} = 10.6$ ,  $J_{2'b,3'} = 6.0$ , H-2'b); 2.43 (s, 3H,  $CH_3$ -Tol); 2.58 (ddd, 1H,  $J_{gem} = 13.8$ ,  $J_{2'a,1'} = 5.2$ ,  $J_{2'a,3'} = 1.2$ , H-2'a); 4.51 (td, 1H,  $J_{4',5'} = 4.0$ ,  $J_{4',3'} = 2.1$ , H-4'); 4.61 (d, 2H,  $J_{5',4'} = 4.0$ , H-5'); 5.46 (dddd, 1H,  $J_{1',2'} = 10.6$ , 5.2,  $J_{1',3} = 0.7$ ,  $J_{1',3'} = 0.5$ , H-1'); 5.62 (dddd, 1H,  $J_{3',2'} = 6.0$ , 1.2,  $J_{3',4'} = 2.1$ ,  $J_{3',1'} = 0.5$ , H-3'); 6.40 (dd, 1H,  $J_{3,4} = 3.4$ ,  $J_{3,5} = 0.9$ , H-3-furyl); 6.41 (dd, 1H,  $J_{4,3} = 3.4$ ,  $J_{4,5} = 1.8$ , H-4-furyl); 6.96 (dd, 1H,  $J_{3,4} = 3.7$ ,  $J_{3,1'} = 0.7$ , H-3); 7.08 (d, 1H,  $J_{4,3} = 3.7$ , H-4); 7.23 and 7.27 ( $2 \times m$ ,  $2 \times 2H$ , H-*m*-Tol); 7.38 (dd, 1H,  $J_{5,4} = 1.8$ ,  $J_{5,3} = 0.9$ , H-5-furyl); 7.96 and 7.97 ( $2 \times m$ ,  $2 \times 2H$ , H-*o*-Tol).  $^{13}C$  NMR (125.7 MHz,  $CDCl_3$ ): 21.64 and 21.68 ( $CH_3$ -Tol); 41.7 ( $CH_2$ -2'); 64.5 ( $CH_2$ -5'); 76.9 (CH-1'); 77.0 (CH-3'); 83.0 (CH-4'); 105.1 (CH-3-furyl); 111.6 (CH-4-furyl); 122.0 (CH-4); 125.3 (CH-3); 126.9 and 127.2 (C-*i*-

Tol); 129.1 and 129.2 (CH-*m*-Tol); 129.7 and 129.8 (CH-*o*-Tol); 133.55 (C-5); 141.7 (CH-5-furyl); 141.7 (C-2); 143.8 and 144.2 (C-*p*-Tol); 149.3 (C-2-furyl); 166.0 and 166.4 (CO). IR spectrum (KBr): 3153, 3067, 1717, 1612, 1271, 1105, 1020 cm<sup>-1</sup>.  $[\alpha]_{\text{D}}^{20} = + 71.4$  (*c* 2.06, CHCl<sub>3</sub>).

**1β-[5-([2,2']Bipyridin-6-yl)thiophen-2-yl]-1,2-dideoxy-3,5-di-3,5-di-*O*-toluoyl-D-ribofuranose (4i).** *n*-BuLi (1.7 mL, 1.6 M in hexane, 2.72 mmol,) was added dropwise into a solution of 6-bromo[2,2']bipyridine (447 mg, 1.90 mmol) in THF (15 mL) under argon at -72 °C during 5 min, and mixture was stirred for 2 min followed by addition of Bu<sub>3</sub>SnCl (740 μL, 1.90 mmol). After being stirred for 20 min at -72 °C, the reaction was allowed to warm to rt, and the solvent was carefully evaporated under vacuum. The crude 6-(tributylstannyl)[2,2']bipyridine<sup>Chyba! Záložka není definována.</sup> was dissolved in DMF (4.5 mL) and added through septum to a flask containing **4a** (700 mg, 1.36 mmol) and PdCl<sub>2</sub>dppf (50 mg, 0.07 mmol) seal under argon. The reaction mixture was stirred at 100 °C for 22 h. Chromatography on silica gel in gradient hexane to hexane/EtOAc (9.7/0.3) to gave only crude **4i** (358 mg) as a yellow oil. The crude product was stirred with Me<sub>3</sub>Al (460 μL, 2M in toluene, 0.91 mmol) in toluene (13 mL) at rt for 24 h and worked up as in **4f**. Flash chromatography on silica gel eluting hexane to hexane/EtOAc (19.8/0.2) gave pure product **4i** (308 mg, 64%) as a colorless oil. MS (FAB) *m/z* 591 (M + H); HRMS (FAB) for C<sub>35</sub>H<sub>31</sub>N<sub>2</sub>O<sub>5</sub>S: [M + H] 591.1954 found, 591.1942. <sup>1</sup>H NMR (500 MHz, CDCl<sub>3</sub>): 2.32 and 2.44 (2 × s, 2 × 3H, CH<sub>3</sub>-Tol); 2.50 (ddd, 1H, *J*<sub>gem</sub> = 13.9, *J*<sub>2b,1'</sub> = 10.6, *J*<sub>2b,3'</sub> = 6.0, H-2'b); 2.64 (ddd, 1H, *J*<sub>gem</sub> = 13.9, *J*<sub>2'a,1'</sub> = 5.2, *J*<sub>2'a,3'</sub> = 1.2, H-2'a); 4.56 (ddd, 1H, *J*<sub>4',5'</sub> = 4.2, 3.9, *J*<sub>4',3'</sub> = 1.9, H-4'); 4.62 (dd, 1H, *J*<sub>gem</sub> = 11.8, *J*<sub>5b,4'</sub> = 4.2, H-5'b); 4.68 (dd, 1H, *J*<sub>gem</sub> = 11.8, *J*<sub>5'a,4'</sub> = 3.9, H-5'a); 5.53 (dddd, 1H, *J*<sub>1',2'</sub> = 10.6, 5.2, *J*<sub>1',3</sub> = 0.8, *J*<sub>1',3'</sub> = 0.5, H-1'); 5.65 (dddd, 1H, *J*<sub>3',2'</sub> = 6.0, 1.2, *J*<sub>3',4'</sub> = 1.9, *J*<sub>3',1'</sub> = 0.5, H-3'); 7.08 (dd, 1H, *J*<sub>3,4</sub> = 3.7, *J*<sub>3,1'</sub> = 0.8, H-3);

7.20 and 7.28 (2 × m, 2 × 2H, H-*m*-Tol); 7.30 (ddd, 1H,  $J_{5',4'} = 7.4$ ,  $J_{5',6'} = 4.8$ ,  $J_{5',3'} = 1.2$ , H-5'-bipy); 7.50 (d, 1H,  $J_{4,3} = 3.7$ , H-4); 7.61 (dd, 1H,  $J_{5,4} = 7.8$ ,  $J_{5,3} = 0.9$ , H-5-bipy); 7.74 (ddd, 1H,  $J_{4',3'} = 8.0$ ,  $J_{4',5'} = 7.4$ ,  $J_{4',6'} = 1.8$ , H-4'-bipy); 7.80 (t, 1H,  $J_{4,3} = J_{4,5} = 7.8$ , H-4-bipy); 7.98 and 8.02 (2 × m, 2 × 2H, H-*o*-Tol); 8.28 (dd, 1H,  $J_{3,4} = 7.8$ ,  $J_{3,5} = 0.9$ , H-3-bipy); 8.48 (ddd, 1H,  $J_{3',4'} = 8.0$ ,  $J_{3',5'} = 1.2$ ,  $J_{3',6'} = 0.9$ , H-3'-bipy); 8.67 (ddd, 1H,  $J_{6',5'} = 4.8$ ,  $J_{6',4'} = 1.8$ ,  $J_{6',3'} = 0.9$ , H-6'-bipy).  $^{13}\text{C}$  NMR (125.7 MHz,  $\text{CDCl}_3$ ): 21.6 and 21.7 ( $\text{CH}_3$ -Tol); 41.9 ( $\text{CH}_2$ -2'); 64.7 ( $\text{CH}_2$ -5'); 77.1 ( $\text{CH}$ -3'); 77.2 ( $\text{CH}$ -1'); 83.0 ( $\text{CH}$ -4'); 118.3 ( $\text{CH}$ -5-bipy); 119.0 ( $\text{CH}$ -3-bipy); 121.4 ( $\text{CH}$ -3'-bipy); 123.8 ( $\text{CH}$ -5'-bipy); 124.0 ( $\text{CH}$ -4); 125.7 ( $\text{CH}$ -3); 126.9 and 127.1 ( $\text{C}$ -*i*-Tol); 129.1 and 129.2 ( $\text{CH}$ -*m*-Tol); 129.7 and 129.8 ( $\text{CH}$ -*o*-Tol); 136.9 ( $\text{CH}$ -4'-bipy); 137.5 ( $\text{CH}$ -4-bipy); 143.7 and 144.2 ( $\text{C}$ -*p*-Tol); 144.9 ( $\text{C}$ -5); 146.1 ( $\text{C}$ -2); 148.95 ( $\text{CH}$ -6'-bipy); 151.65 ( $\text{C}$ -6-bipy); 155.55 ( $\text{C}$ -2-bipy); 155.8 ( $\text{C}$ -2'-bipy); 166.0 and 166.4 (CO). IR spectrum (KBr): 3066, 3039, 2954, 2926, 2858, 1725, 1613, 1475, 1430, 1268, 1178, 1103, 1021, 997  $\text{cm}^{-1}$ .  $[\alpha]_{\text{D}}^{20} = -105.5$  ( $c$  4.81,  $\text{CHCl}_3$ ).

**General procedure for the Suzuki cross-coupling:** To an argon-purged flask containing TTPTS (36 mg, 0.06 mmol) and  $\text{Pd}(\text{OAc})_2$  (5.6 mg, 0.025 mmol), a mixture of  $\text{H}_2\text{O}$ /acetonitrile (2:1) (2.5 mL) was added and the mixture was sonicated for 2 min. This solution was added into a mixture of **6a** (140 mg, 0.5 mmol), boronic acid (0.75 mmol),  $\text{Cs}_2\text{CO}_3$  (489 mg, 1.5 mmol) in  $\text{H}_2\text{O}$ /acetonitrile (2:1) (2 mL). The mixture was then stirred at 90 or 120 °C for 2-4 h. After evaporation, the crude product was purified by flash chromatography on silica gel in gradient  $\text{CHCl}_3$  to  $\text{CHCl}_3/\text{MeOH}$  (9.5/0.5).

**1 $\beta$ -[5-(4-Fluorophenyl)thiophen-2-yl]-1,2-dideoxy-D-ribofuranose (6m).** Prepared from **6a** and 4-fluorophenylboronic acid (105 mg, 0.75 mmol) by the general procedure (120 °C, 4 h). **6m** (117 mg, 80%) was obtained as a brown oil which was crystallized from



isopropanol/heptan to give brown crystals, mp 106-108 °C. MS (FAB)  $m/z$  295 ( $M + H$ ); HRMS (FAB) for  $C_{15}H_{16}FO_3S$ :  $[M + H]$  calculated 295.0804, found 295.0814.  $^1H$  NMR (500 MHz, DMSO- $d_6$ ): 1.96 (ddd, 1H,  $J_{gem} = 12.8$ ,  $J_{2'b,1'} = 10.1$ ,  $J_{2'b,3'} = 5.5$ , H-2'b); 2.14 (ddd, 1H,  $J_{gem} = 12.8$ ,  $J_{2'a,1'} = 5.5$ ,  $J_{2'a,3'} = 1.8$ , H-2'a); 3.37 (dt, 1H,  $J_{gem} = 11.3$ ,  $J_{5'b,4'} = 6.2$ ,  $J_{5'b,OH} = 5.6$ , H-5'b); 3.45 (dt, 1H,  $J_{gem} = 11.3$ ,  $J_{5'a,OH} = 5.3$ ,  $J_{5'a,4'} = 5.0$ , H-5'a); 3.77 (ddd, 1H,  $J_{4',5'} = 6.2$ , 5.0,  $J_{4',3'} = 2.2$ , H-4'); 4.21 (m, 1H,  $J_{3',2'} = 5.5$ , 1.8,  $J_{3',OH} = 3.9$ ,  $J_{3',4'} = 2.2$ ,  $J_{3',1'} = 0.6$ , H-3'); 4.76 (t, 1H,  $J_{OH,5'} = 5.6$ , 5.3, OH-5'); 5.12 (d, 1H,  $J_{OH,3'} = 3.9$ , OH-3'); 5.23 (ddt, 1H,  $J_{1',2'} = 10.1$ , 5.5,  $J_{1',3'} = 0.8$ ,  $J_{1',3'} = 0.6$ , H-1'); 7.03 (dd, 1H,  $J_{3,4} = 3.6$ ,  $J_{3,1'} = 0.8$ , H-3); 7.23 (m, 2H, H-*m*-C<sub>6</sub>H<sub>4</sub>F); 7.30 (d, 1H,  $J_{4,3} = 3.6$ , H-4); 7.65 (m, 2H, H-*o*-C<sub>6</sub>H<sub>4</sub>F).  $^{13}C$  NMR (125.7 MHz, DMSO- $d_6$ ): 43.6 (CH<sub>2</sub>-2'); 62.7 (CH<sub>2</sub>-5'); 72.5 (CH-3'); 75.4 (CH-1'); 88.0 (CH-4'); 116.2 (d,  $J_{C,F} = 22$ , CH-*m*-C<sub>6</sub>H<sub>4</sub>F); 123.4 (CH-4); 125.9 (CH-3); 127.4 (d,  $J_{C,F} = 8$ , CH-*o*-C<sub>6</sub>H<sub>4</sub>F); 130.7 (d,  $J_{C,F} = 3$ , C-*i*-C<sub>6</sub>H<sub>4</sub>F); 141.3 (C-5); 146.1 (C-2); 161.8 (d,  $J_{C,F} = 245$ , C-*p*-C<sub>6</sub>H<sub>4</sub>F).  $^{19}F$  NMR (470.3 MHz, DMSO- $d_6$ ): -111.4. IR spectrum (CHCl<sub>3</sub>): 3612, 3417, 3076, 1604, 1552, 1514, 1474, 1474, 1354, 1235, 1160, 1097, 1039, 960 cm<sup>-1</sup>.  $[\alpha]^{20}_D +10.0$  (c 2.36, CHCl<sub>3</sub>). Anal. Calcd  $C_{15}H_{15}FO_3S$  (294.3): C, 61.21; H, 5.14; F, 6.45; S, 10.89; found: C, 60.88; H, 5.15; F, 6.50; S 10.64.

**1β-[5-(Thiophen-3-yl)thiophen-2-yl]-1,2-dideoxy-D-ribofuranose (6n).** Compound **6n** was prepared from **6a** and 3-thienylboronic acid (96 mg, 0.75 mmol) by the general procedure (120 °C, 4 h). **6n** (99 mg, 70%) was obtained as a yellow oil which was crystallized from isopropanol/heptan to give yellow crystals, mp 123-125 °C. MS (FAB)  $m/z$  283 ( $M + H$ ); HRMS (FAB) for  $C_{13}H_{15}O_3S_2$ :  $[M + H]$  calculated 283.0463, found 283.0469.  $^1H$  NMR (500 MHz, DMSO- $d_6$ ): 1.96 (ddd, 1H,  $J_{gem} = 12.8$ ,  $J_{2'b,1'} = 10.2$ ,  $J_{2'b,3'} = 5.6$ , H-2'b); 2.13 (ddd, 1H,  $J_{gem} = 12.8$ ,  $J_{2'a,1'} = 5.5$ ,  $J_{2'a,3'} = 1.8$ , H-2'a); 3.37 (dt, 1H,  $J_{gem} = 11.3$ ,  $J_{5'b,4'} = 6.3$ ,  $J_{5'b,OH} = 6.1$ , H-5'b); 3.45 (dt, 1H,  $J_{gem} = 11.3$ ,  $J_{5'a,OH} = 5.4$ ,  $J_{5'a,4'} = 5.0$ , H-5'a); 3.76 (ddd, 1H,  $J_{4',5'} =$

6.0, 5.0,  $J_{4',3'} = 2.2$ , H-4'); 4.20 (m, 1H,  $J_{3',2'} = 5.6$ , 1.8,  $J_{3',OH} = 3.9$ ,  $J_{3',4'} = 2.2$ ,  $J_{3',1'} = 0.6$ , H-3'); 4.76 (t, 1H,  $J_{OH,5'} = 6.1$ , 5.4, OH-5'); 5.11 (d, 1H,  $J_{OH,3'} = 3.9$ , OH-3'); 5.21 (ddt, 1H,  $J_{1',2'} = 10.2$ , 5.5,  $J_{1',3} = 0.8$ ,  $J_{1',3'} = 0.6$ , H-1'); 6.99 (dd, 1H,  $J_{3,4} = 3.6$ ,  $J_{3,1'} = 0.8$ , H-3); 7.34 (d, 1H,  $J_{4,3} = 3.6$ , H-4); 7.39 (dd, 1H,  $J_{4,5} = 5.0$ ,  $J_{4,2} = 1.4$ , H-4-thienyl); 7.61 (dd, 1H,  $J_{5,4} = 5.0$ ,  $J_{5,2} = 2.9$ , H-5-thienyl); 7.65 (dd, 1H,  $J_{2,5} = 2.9$ ,  $J_{2,4} = 1.4$ , H-2-thienyl).  $^{13}\text{C}$  NMR (125.7 MHz, DMSO- $d_6$ ): 43.62 (CH<sub>2</sub>-2'); 62.66 (CH<sub>2</sub>-5'); 72.5 (CH-3'); 75.4 (CH-1'); 88.0 (CH-4'); 120.0 (CH-2-thienyl); 123.2 (CH-4); 125.4 (CH-3); 126.05 (CH-4-thienyl); 127.55 (CH-5-thienyl); 135.4 (C-3-thienyl); 137.7 (C-5); 144.8 (C-2). IR spectrum (KBr): 3402, 3327, 3085, 2981, 1478, 1426, 1359, 1346, 1090, 1080, 1045, 1036  $\text{cm}^{-1}$ .  $[\alpha]_D^{20} +2.1$  (c 2.81, CHCl<sub>3</sub>). Anal. Calcd C<sub>13</sub>H<sub>14</sub>O<sub>3</sub>S<sub>2</sub> (282.4): C, 55.29; H, 5.00; S, 22.71; found: C, 55.25; H, 5.09; S 22.30.

**1 $\beta$ -[5-(Furan-3-yl)thiophen-2-yl]-1,2-dideoxy-D-ribofuranose (6o).** Prepared from **6a** and 3-furylboronic acid (84 mg, 0.75 mmol) by the general procedure (90 °C, 2 h). **6o** (103 mg, 78%) was obtained as a yellow oil which was crystallized from isopropanol/heptan to give yellow crystals, mp 107-110 °C. MS (FAB)  $m/z$  267 (M + H); HRMS (FAB) for C<sub>13</sub>H<sub>15</sub>O<sub>4</sub>S: [M + H] calculated 267.0691, found 267.0696.  $^1\text{H}$  NMR (500 MHz, DMSO- $d_6$ ): 1.92 (ddd, 1H,  $J_{\text{gem}} = 12.8$ ,  $J_{2'b,1'} = 10.2$ ,  $J_{2'b,3'} = 5.6$ , H-2'b); 2.11 (ddd, 1H,  $J_{\text{gem}} = 12.8$ ,  $J_{2'a,1'} = 5.5$ ,  $J_{2'a,3'} = 1.8$ , H-2'a); 3.36 (dt, 1H,  $J_{\text{gem}} = 11.2$ ,  $J_{5'b,4'} = 6.2$ ,  $J_{5'b,OH} = 6.9$ , H-5'b); 3.44 (dt, 1H,  $J_{\text{gem}} = 11.2$ ,  $J_{5'a,OH} = 5.3$ ,  $J_{5'a,4'} = 5.1$ , H-5'a); 3.75 (ddd, 1H,  $J_{4',5'} = 6.2$ , 5.1,  $J_{4',3'} = 2.2$ , H-4'); 4.19 (m, 1H,  $J_{3',2'} = 5.6$ , 1.8,  $J_{3',OH} = 3.9$ ,  $J_{3',4'} = 2.2$ ,  $J_{3',1'} = 0.5$ , H-3'); 4.75 (t, 1H,  $J_{OH,5'} = 5.9$ , 5.3, OH-5'); 5.11 (d, 1H,  $J_{OH,3'} = 3.9$ , OH-3'); 5.21 (ddt, 1H,  $J_{1',2'} = 10.2$ , 5.5,  $J_{1',3} = 0.8$ ,  $J_{1',3'} = 0.5$ , H-1'); 6.80 (dd, 1H,  $J_{4,5} = 1.9$ ,  $J_{4,2} = 0.9$ , H-4-furyl); 6.97 (dd, 1H,  $J_{3,4} = 3.6$ ,  $J_{3,1'} = 0.8$ , H-3); 7.09 (d, 1H,  $J_{4,3} = 3.6$ , H-4); 7.72 (t, 1H,  $J_{5,4} = 1.9$ ,  $J_{5,2} = 1.6$ , H-5-furyl); 8.01 (dd, 1H,  $J_{2,5} = 1.6$ ,  $J_{2,4} = 0.9$ , H-2-furyl).  $^{13}\text{C}$  NMR (125.7 MHz, DMSO- $d_6$ ): 43.65 (CH<sub>2</sub>-2'); 62.68 (CH<sub>2</sub>-5'); 72.5 (CH-3'); 75.4 (CH-1'); 88.0 (CH-4'); 126.05 (CH-4-furyl); 120.5 (C-3-

furyl); 123.4 (CH-4); 125.25 (CH-3); 133.5 (C-5); 138.6 (CH-2-furyl); 144.5 (C-2); 144.5 (CH-5-furyl). IR spectrum (KBr): 3408, 3135, 2940, 1031, 1511, 1360, 1349, 1206, 1044, 3325  $\text{cm}^{-1}$ .  $[\alpha]_{\text{D}}^{20} +12.0$  (*c* 2.35,  $\text{CHCl}_3$ ). Anal. Calcd for  $\text{C}_{13}\text{H}_{14}\text{O}_4\text{S}$  (266.3): C, 58.63; H, 5.30; found: C 58.32; H 5.32.

**1 $\beta$ -(3-Nitrophenyl)thiophen-2-yl]-1,2-dideoxy-D-ribofuranose (6p).** Prepared from **6a** (140 mg, 0.5 mmol) and 3-nitrophenylboronic acid (126 mg, 0.75 mmol) by the general procedure (90 °C, 2 h). **6p** (119 mg, 74%) was obtained as a yellow oil which was crystallized from isopropanol/heptan to give yellow crystals, mp 123-124 °C. MS (FAB) *m/z* 322 (*M* + *H*); HRMS (FAB) for  $\text{C}_{15}\text{H}_{16}\text{NO}_5\text{S}$ : [*M* + *H*] calculated 322.07492, found 322.0738.  $^1\text{H}$  NMR (500 MHz,  $\text{DMSO}-d_6$ ): 1.97 (ddd, 1H,  $J_{\text{gem}} = 12.8$ ,  $J_{2'b,1'} = 10.1$ ,  $J_{2'b,3'} = 5.5$ , H-2'b); 2.17 (ddd, 1H,  $J_{\text{gem}} = 12.8$ ,  $J_{2'a,1'} = 5.5$ ,  $J_{2'a,3'} = 1.8$ , H-2'a); 3.39 (dt, 1H,  $J_{\text{gem}} = 11.3$ ,  $J_{5'b,4'} = 6.1$ ,  $J_{5'b,\text{OH}} = 5.8$ , H-5'b); 3.47 (dt, 1H,  $J_{\text{gem}} = 11.3$ ,  $J_{5'a,\text{OH}} = 5.3$ ,  $J_{5'a,4'} = 5.0$ , H-5'a); 3.79 (ddd, 1H,  $J_{4',5'} = 6.1$ , 5.0,  $J_{4',3'} = 2.1$ , H-4'); 4.22 (m, 1H,  $J_{3',2'} = 5.5$ , 1.8,  $J_{3',\text{OH}} = 3.9$ ,  $J_{3',4'} = 2.1$ ,  $J_{3',1'} = 0.6$ , H-3'); 4.78 (t, 1H,  $J_{\text{OH},5'} = 5.8$ , 5.3, OH-5'); 5.14 (t, 1H,  $J_{\text{OH},3'} = 3.9$ , OH-3'); 5.27 (ddt, 1H,  $J_{1',2'} = 10.1$ , 5.5,  $J_{1',3} = 0.8$ ,  $J_{1',3'} = 0.6$ , H-1'); 7.11 (dd, 1H,  $J_{3,4} = 3.7$ ,  $J_{3,1'} = 0.8$ , H-3); 7.60 (d, 1H,  $J_{4,3} = 3.7$ , H-4); 7.69 (t, 1H,  $J_{5,4} = 8.2$ ,  $J_{5,6} = 7.8$ , H-5- $\text{C}_6\text{H}_4\text{NO}_2$ ); 8.07 (ddd, 1H,  $J_{6,5} = 7.8$ ,  $J_{6,2} = 1.9$ ,  $J_{6,4} = 1.0$ , H-6- $\text{C}_6\text{H}_4\text{NO}_2$ ); 8.12 (ddd, 1H,  $J_{4,5} = 8.2$ ,  $J_{4,2} = 2.3$ ,  $J_{4,6} = 1.0$ , H-4- $\text{C}_6\text{H}_4\text{NO}_2$ ); 8.37 (t, 1H,  $J_{2,4} = 2.3$ ,  $J_{2,6} = 1.9$ , H-2- $\text{C}_6\text{H}_4\text{NO}_2$ ).  $^{13}\text{C}$  NMR (125.7 MHz,  $\text{DMSO}-d_6$ ): 43.7 ( $\text{CH}_2$ -2'); 62.6 ( $\text{CH}_2$ -5'); 72.5 (CH-3'); 75.4 (CH-1'); 88.1 (CH-4'); 119.3 (CH-2- $\text{C}_6\text{H}_4\text{NO}_2$ ); 122.0 (CH-4- $\text{C}_6\text{H}_4\text{NO}_2$ ); 125.5 (CH-4); 126.1 (CH-3); 130.9 (CH-5- $\text{C}_6\text{H}_4\text{NO}_2$ ); 131.6 (CH-6- $\text{C}_6\text{H}_4\text{NO}_2$ ); 135.7 (C-1- $\text{C}_6\text{H}_4\text{NO}_2$ ); 141.5 (C-5); 148.1 (C-2); 148.6 (C-3- $\text{C}_6\text{H}_4\text{NO}_2$ ). IR spectrum (KBr): 3351, 3094, 1615, 1551, 1529, 1353, 1201, 1173, 1085, 1078, 1042, 998  $\text{cm}^{-1}$ .  $[\alpha]_{\text{D}}^{20} +2.7$  (*c* 2.69,  $\text{CHCl}_3$ ). Anal. Calcd for  $\text{C}_{15}\text{H}_{15}\text{NO}_5\text{S}$  (321.3): C, 56.06; H, 4.70; N, 4.36; found: C 56.22; H 4.50; N 4.82.

**General procedure for the deprotection of TBDMS-Group:** Et<sub>3</sub>N•3HF (363 μL, 2.25 mmol) was added to a solution of compounds **7b-7d** (0.45 mmol) in THF (4 mL) and the mixture was stirred at room temperature for 48 h. After the reaction was completed (TLC hexane/EtOAc (9/1)), the solvent was evaporated under reduced pressure. Then the crude product was dissolved in MeOH (2 mL), and a 1M aqueous solution of sodium hydroxide (2 mL) was added to neutralize the mixture. The solvent was evaporated and products were purified by flash chromatography on silica gel in gradient chloroform to chloroform/methanol (19.5/0.5). Compounds **6c** and **6d** were re-purified by flash chromatography on reverse phase (C18 column, with linear gradient of H<sub>2</sub>O to MeOH).

**1β-(5-Thiophen-2-yl)-1,2-dideoxy-D-ribofuranose (6b).** Yield (69 mg, 78%).

**1β-(5-Methylthiophen-2-yl)-1,2-dideoxy-D-ribofuranose (6c).** Prepared from mixture **7c/7b** (390 mg, 0.88 mmol) by the general procedure. The crude product was chromatographed to give **6c** (94 mg, 50%) and **6b** (14 mg, 8%) as yellow oils.

**1β-(5-Ethylthiophen-2-yl)-1,2-dideoxy-D-ribofuranose (6d).** Prepared from mixture **7d/7b** (330 mg, 0.73 mmol) by the general procedure. The crude product was chromatographed to give **6d** (95 mg, 73%) and **6b** (20 mg, 14%) as yellow oils. Product did not crystallize, lyophilization gave yellow amorphous solid, mp 28-31 °C. MS (FAB) *m/z* 229 (M + H); HRMS (FAB) for C<sub>11</sub>H<sub>17</sub>O<sub>3</sub>S: [M + H] calculated 229.0898, found 229.0902. <sup>1</sup>H NMR (500 MHz, DMSO-*d*<sub>6</sub>): 1.20 (t, 3H, *J*<sub>vic</sub> = 7.6, CH<sub>3</sub>CH<sub>2</sub>); 1.90 (ddd, 1H, *J*<sub>gem</sub> = 12.8, *J*<sub>2'b,1'</sub> = 10.2, *J*<sub>2'b,3'</sub> = 5.6, H-2'b); 2.06 (ddd, 1H, *J*<sub>gem</sub> = 12.8, *J*<sub>2'a,1'</sub> = 5.5, *J*<sub>2'a,3'</sub> = 1.7, H-2'a);

2.75 (qd, 2H,  $J_{\text{vic}} = 7.6$ ,  $J_{\text{CH}_2,4} = 1.1$ ,  $\text{CH}_2\text{CH}_3$ ); 3.33 (ddd, 1H,  $J_{\text{gem}} = 11.3$ ,  $J_{5'b,4'} = 6.2$ ,  $J_{5'b,\text{OH}} = 5.4$ , H-5'b); 3.41 (ddd, 1H,  $J_{\text{gem}} = 11.3$ ,  $J_{5'a,\text{OH}} = 5.4$ ,  $J_{5'a,4'} = 5.1$ , H-5'a); 3.72 (ddd, 1H,  $J_{4',5'} = 6.2$ , 5.1,  $J_{4',3'} = 2.2$ , H-4'); 4.17 (bm, 1H, H-3'); 4.71 (t, 1H,  $J_{\text{OH},5'} = 5.4$ , OH-5'); 5.07 (bd, 1H,  $J_{\text{OH},3'} = 3.7$ , OH-3'); 5.14 (dddd, 1H,  $J_{1',2'} = 10.2$ , 5.5,  $J_{1',3} = 0.8$ ,  $J_{1',3'} = 0.5$ , H-1'); 6.65 (dt, 1H,  $J_{4,3} = 3.4$ ,  $J_{4,\text{CH}_2} = 1.1$ , H-4); 6.82 (dd, 1H,  $J_{3,4} = 3.4$ ,  $J_{3,1'} = 0.8$ , H-3).  $^{13}\text{C}$  NMR (125.7 MHz,  $\text{DMSO-}d_6$ ): 16.1 ( $\text{CH}_3\text{CH}_2$ ); 23.0 ( $\text{CH}_2\text{CH}_3$ ); 43.5 ( $\text{CH}_2\text{-}2'$ ); 62.7 ( $\text{CH}_2\text{-}5'$ ); 72.5 ( $\text{CH-}3'$ ); 75.4 ( $\text{CH-}1'$ ); 87.8 ( $\text{CH-}4'$ ); 123.0 ( $\text{CH-}4$ ); 124.4 ( $\text{CH-}3$ ); 143.2 (C-2); 146.2 (C-5). IR spectrum (KBr): 3379, 3340, 3083, 2966, 2915, 2875, 1390, 959, 806, 155  $\text{cm}^{-1}$ .  $[\alpha]_D^{20} +7.1$  ( $c$  3.70, MeOH). Anal. Calcd  $\text{C}_{11}\text{H}_{16}\text{O}_3\text{S}$  (228.3): C, 57.87; H, 7.06; found: C, 57.68; H, 7.01.

## UV-vis and fluorescence spectroscopy

Absorption spectra  $\varepsilon(\lambda)$  were measured with a UV-vis scanning spectrophotometer. Fluorescence spectra were recorded upon excitation at the peak of the absorption band (absorbance  $\leq 0.05$ ). The collected photon flux  $\Phi$  was dispersed in a double monochromator and registered by photon counting. Signal from the acetonitrile solvent was measured separately and subtracted. Photometric calibration was performed by comparison with a secondary standard lamp (GIGAHERTZ OPTIC Model BN9701). Thus the relative number of photons per wavelength,  $\partial\Phi/\partial\lambda$ , is obtained in each case. Fluorescence spectra are represented as relative number of photons per energy interval  $\partial\Phi/\partial\tilde{\nu} \equiv F(\tilde{\nu})$  however. This representation allows a direct comparison of absorption and emission band shapes for given compound, or of fluorescence bandshapes from several compounds whose fluorescence ranges across the UV/vis region. The broad first absorption band of **6i** was also examined by fluorescence excitation but no difference to the absorption spectrum was observed. Fluorescence spectra  $F(\tilde{\nu})$  were fitted by a lognormal function.

$$\text{log norm}(\tilde{\nu}) = \exp \left\{ -\ln 2 \left( \frac{\ln \left[ 1 + 2 \gamma (\tilde{\nu} - \tilde{\nu}_p) / \tilde{\Delta} \right]}{\gamma} \right)^2 \right\} \quad (1)$$

with peak wavenumber  $\tilde{\nu}_p$ , width parameter  $\tilde{\Delta}$ , and asymmetry parameter  $\gamma$  in Table 1.

Band positions (wavelengths) are indicated in Figure 2 and collected in Table 2.

**Table S1:** Lognormal parameters (eq. 1) for fluorescence spectra in acetonitrile.

| Compound  | $\tilde{\nu}_p / \text{cm}^{-1}$ | $\tilde{\Delta} / \text{cm}^{-1}$ | $\gamma$ |
|-----------|----------------------------------|-----------------------------------|----------|
| <b>6f</b> | 27250                            | 4120                              | -0.24    |
| <b>6g</b> | 26760                            | 4060                              | -0.26    |
| <b>6h</b> | 27730                            | 4520                              | -0.30    |
| <b>6i</b> | 25270                            | 4575                              | -0.18    |
| <b>6l</b> | 28790                            | 4110                              | -0.30    |
| <b>6m</b> | 28890                            | 4170                              | -0.30    |
| <b>6n</b> | 28980                            | 4175                              | -0.29    |
| <b>6o</b> | 29460                            | 5520                              | -0.30    |

# NMR spectra of 4a

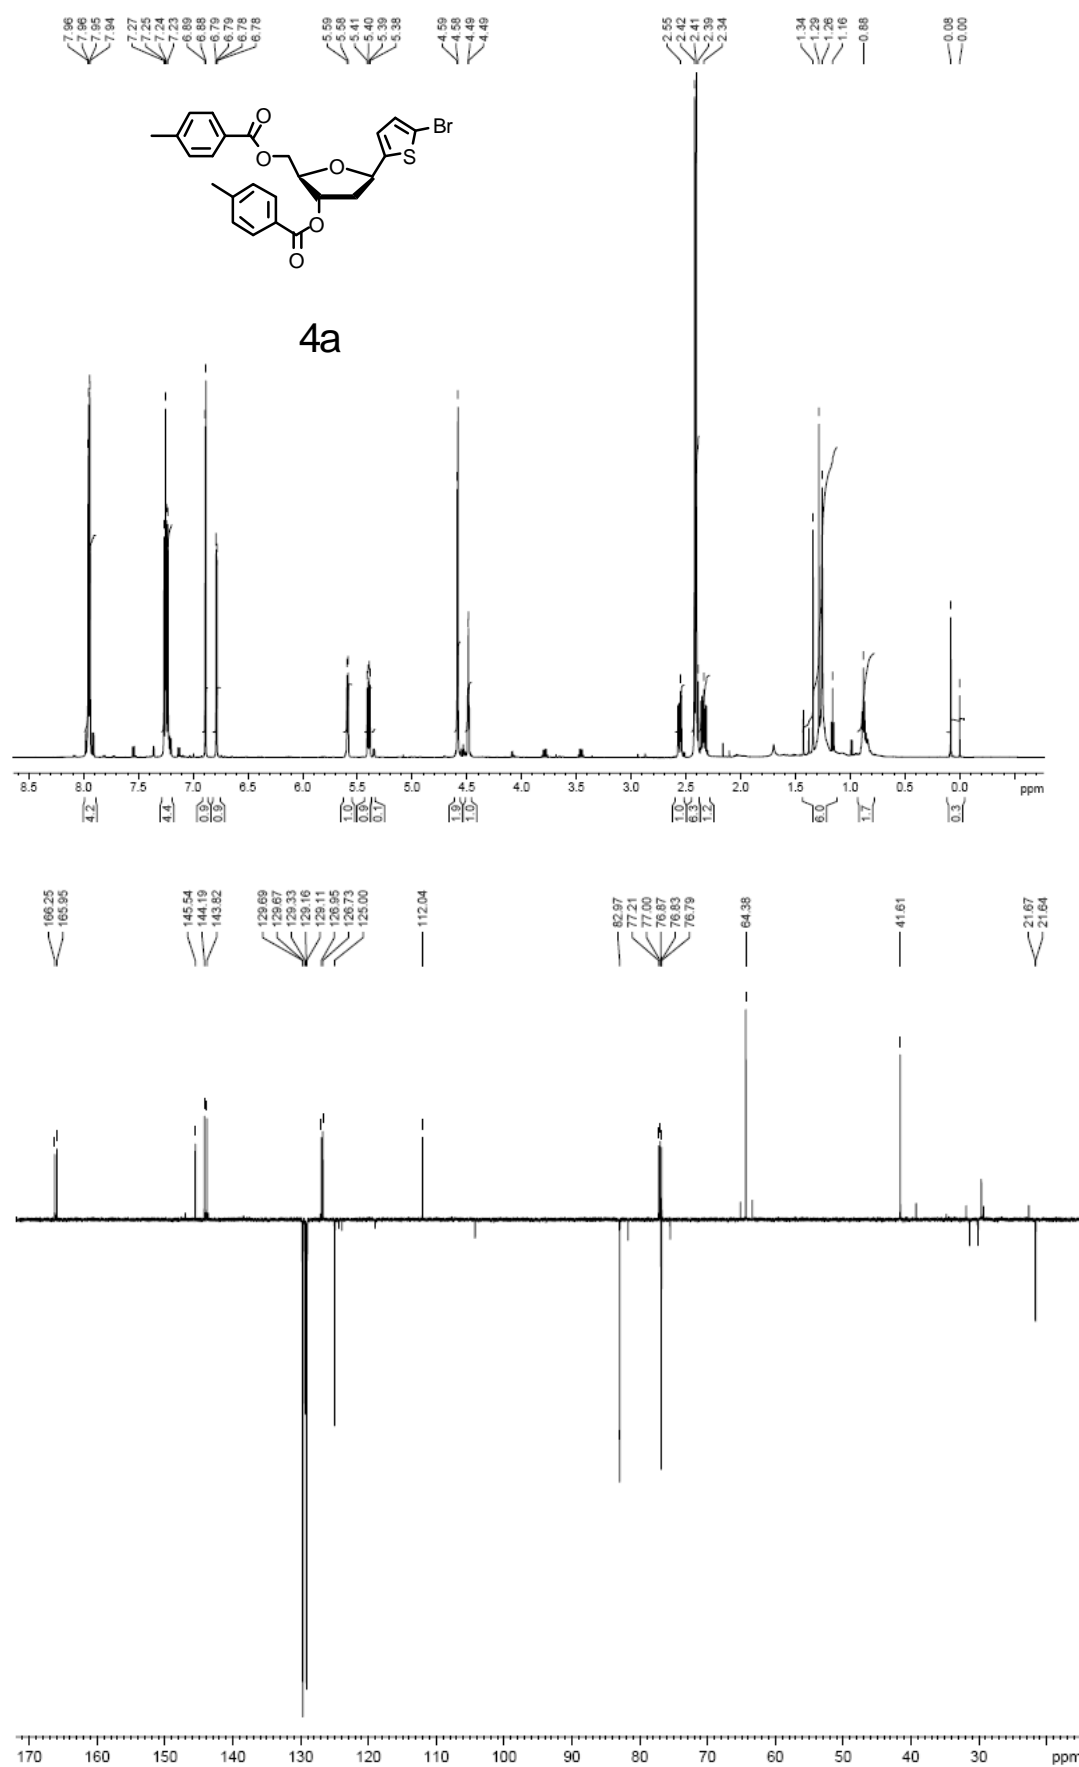

# NMR spectra of 5a

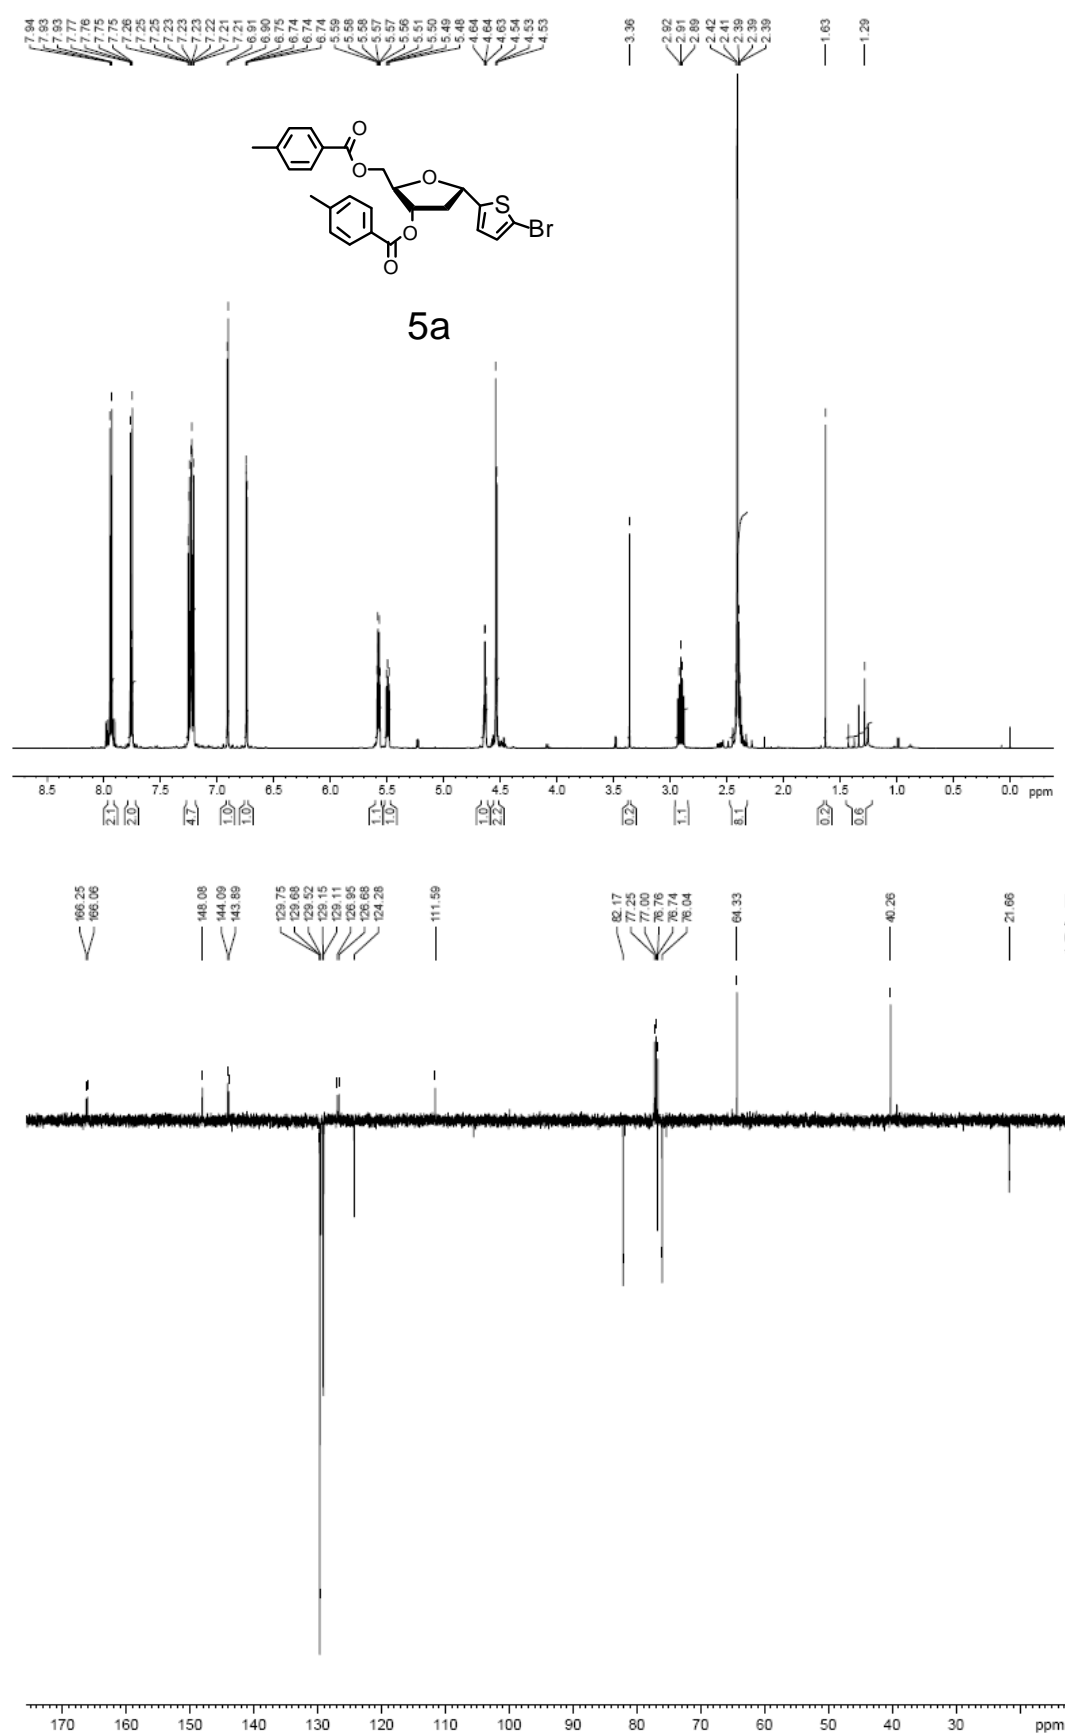



# NMR spectra of 6a

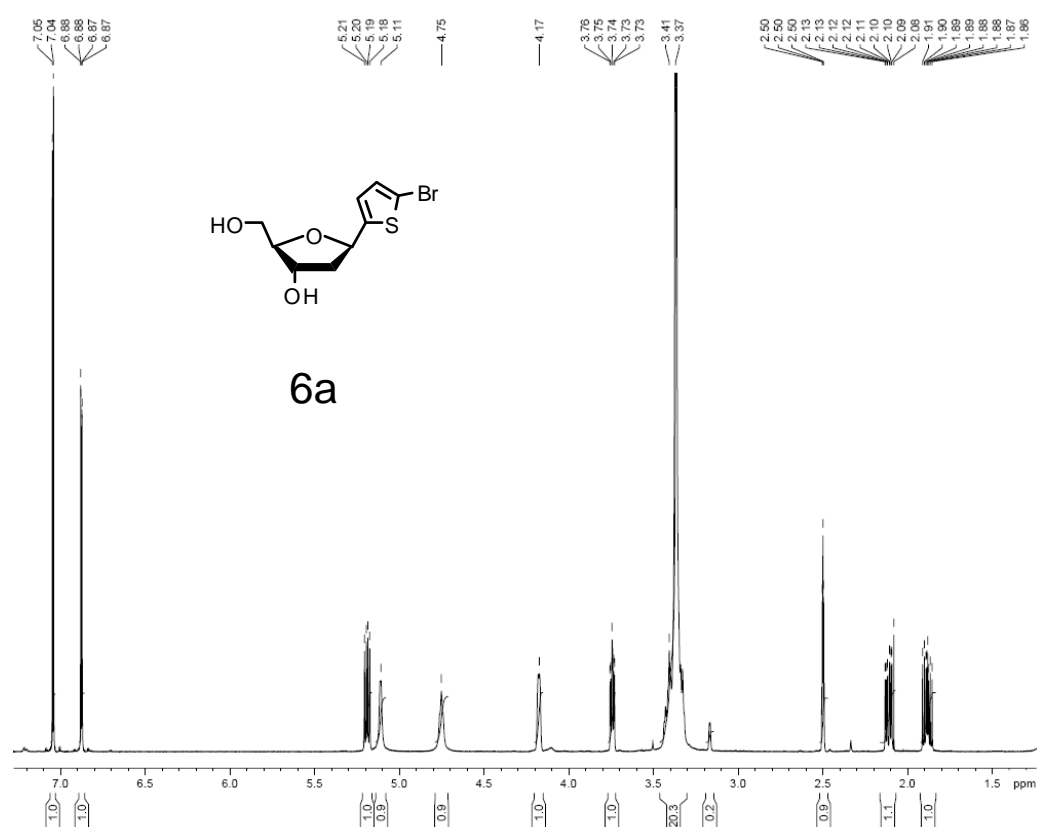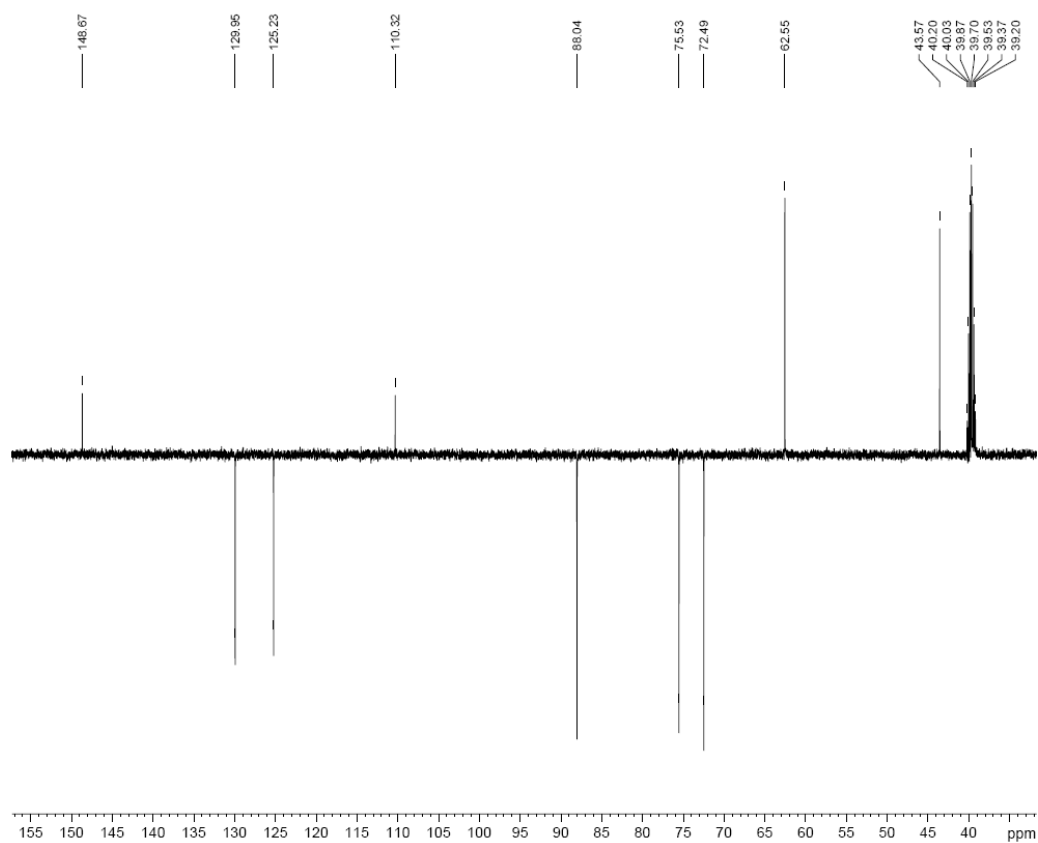

Chemical structure of **7a** is shown above the NMR spectra. The structure is a substituted furan derivative with a TBSO group, a bromine atom, and a thienyl group.

**<sup>1</sup>H NMR spectrum (top):** The spectrum shows peaks in the aromatic region (6.5-7.5 ppm) and aliphatic region (3.5-5.5 ppm). Integration values are provided below the peaks.

**<sup>13</sup>C NMR spectrum (bottom):** The spectrum shows peaks in the aliphatic region (18-26 ppm) and aromatic region (63-148 ppm). Integration values are provided below the peaks.

# NMR spectra of 4b

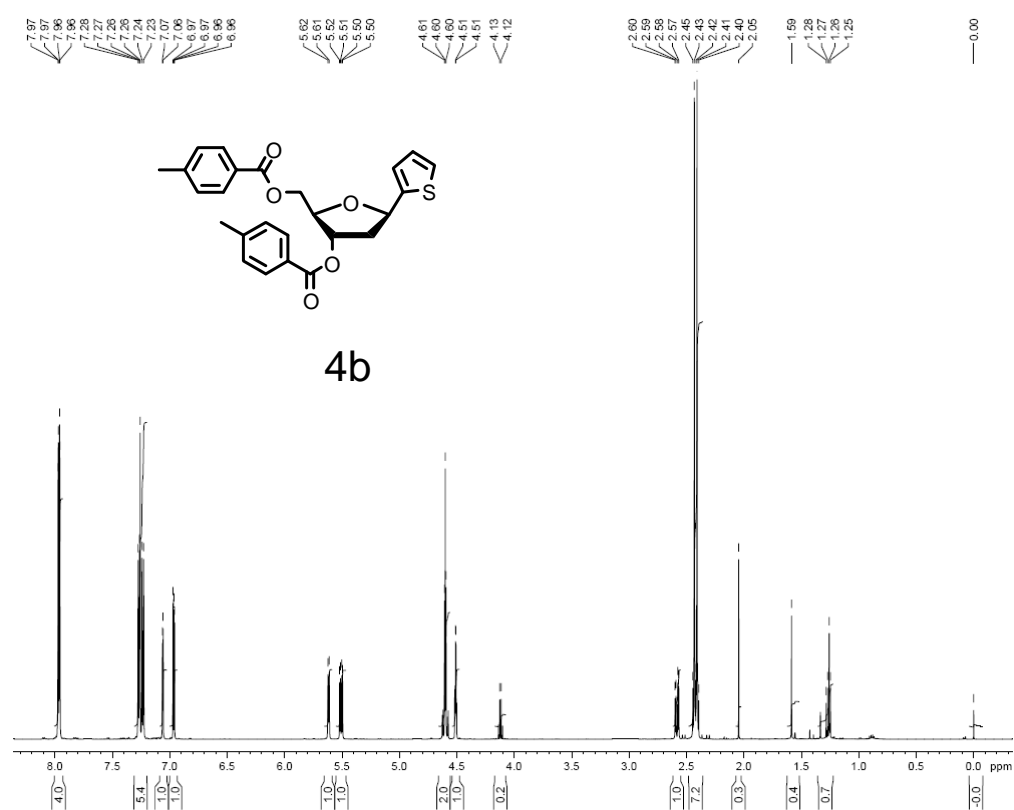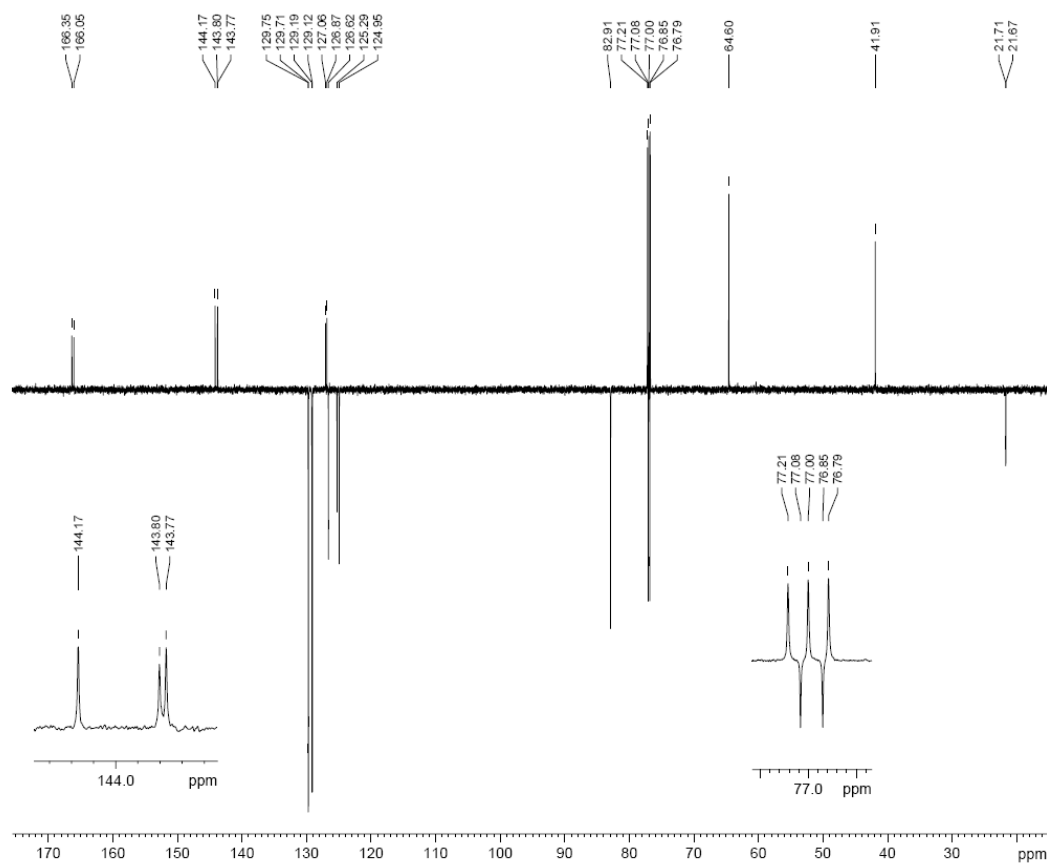

# NMR spectra of 7b

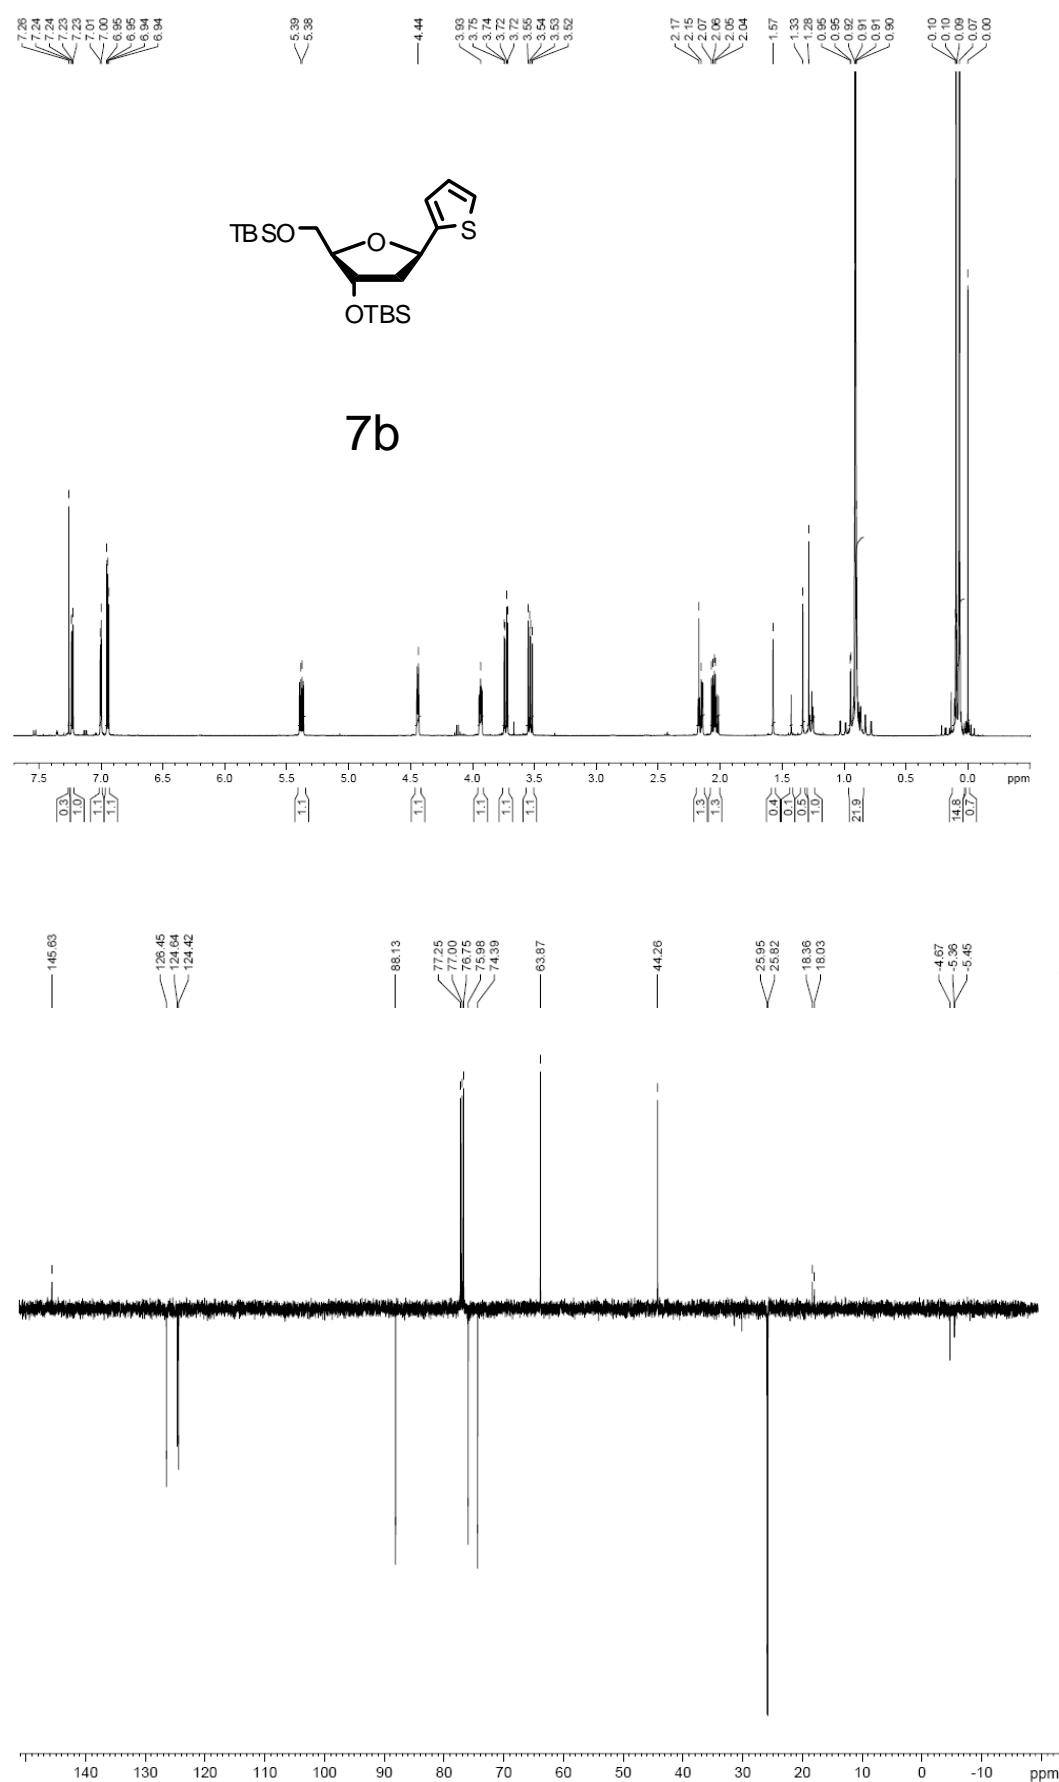

# NMR spectra of 4c

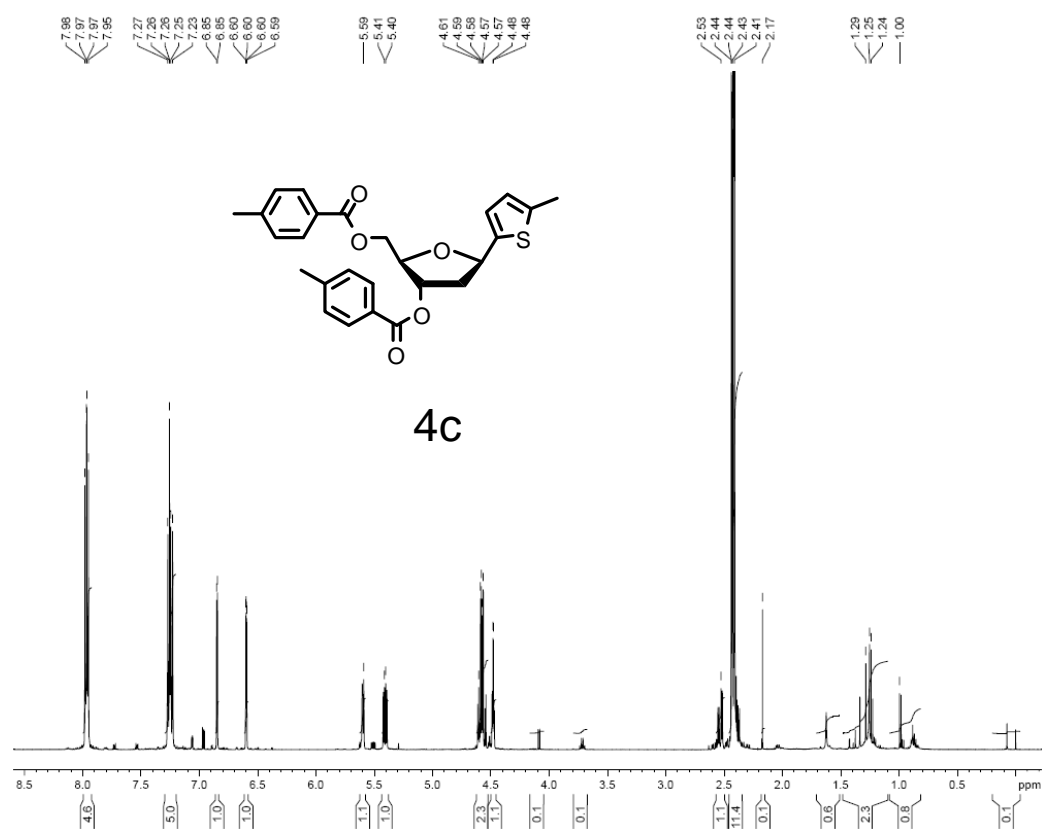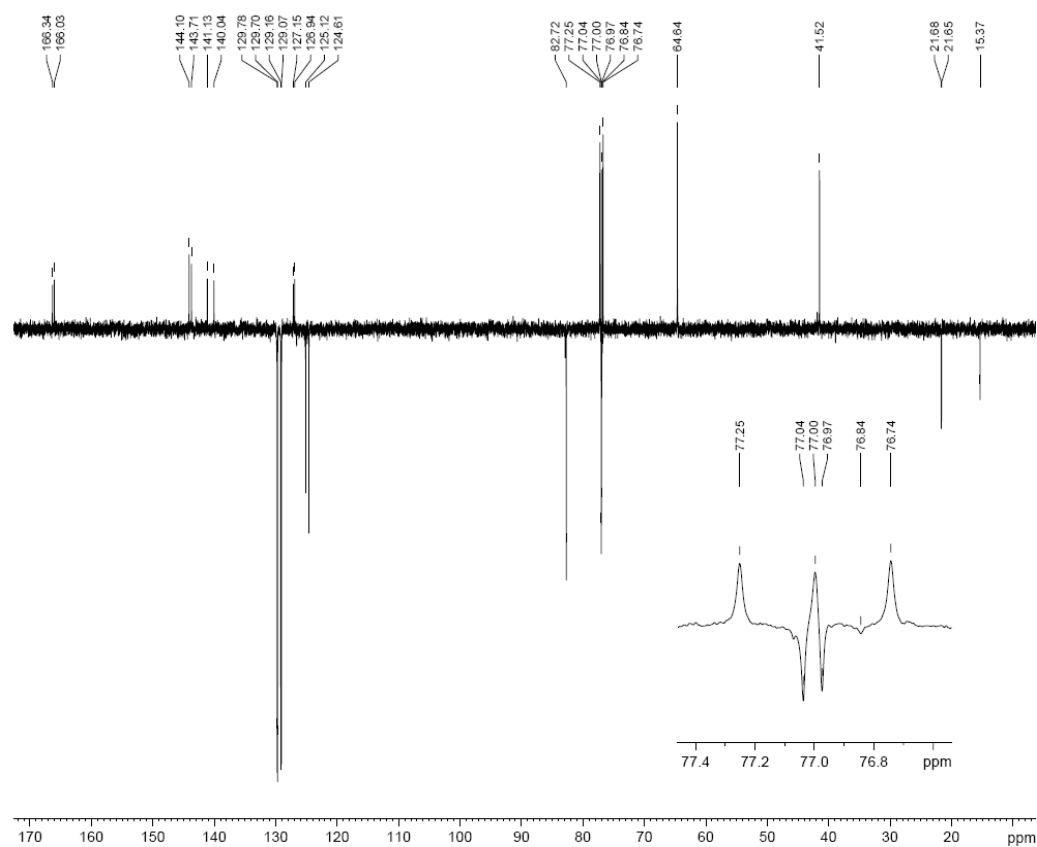

Chemical structure of compound **7d** is shown above the <sup>1</sup>H NMR spectrum. The structure is a substituted tetrahydropyran derivative with a TBSO group, an OTBS group, and a thienyl group.

The <sup>1</sup>H NMR spectrum (400 MHz, CDCl<sub>3</sub>) shows the following peaks (ppm):

- 7.50 (d, 1H, integration 0.1)
- 7.40 (d, 1H, integration 0.2)
- 7.30 (d, 1H, integration 0.3)
- 7.20 (d, 1H, integration 0.3)
- 7.10 (d, 1H, integration 0.5)
- 7.00 (d, 1H, integration 0.3)
- 6.90 (d, 1H, integration 1.1)
- 6.80 (d, 1H, integration 1.0)
- 5.50 (d, 1H, integration 0.2)
- 5.40 (d, 1H, integration 1.3)
- 4.50 (d, 1H, integration 1.4)
- 4.40 (d, 1H, integration 1.4)
- 4.30 (d, 1H, integration 0.3)
- 4.20 (d, 1H, integration 1.5)
- 4.10 (d, 1H, integration 1.5)
- 4.00 (d, 1H, integration 1.5)
- 3.90 (d, 1H, integration 1.5)
- 3.80 (d, 1H, integration 1.5)
- 3.70 (d, 1H, integration 1.5)
- 3.60 (d, 1H, integration 1.5)
- 3.50 (d, 1H, integration 1.5)
- 3.40 (d, 1H, integration 1.5)
- 3.30 (d, 1H, integration 1.5)
- 3.20 (d, 1H, integration 1.5)
- 3.10 (d, 1H, integration 1.5)
- 3.00 (d, 1H, integration 1.5)
- 2.90 (d, 1H, integration 1.5)
- 2.80 (d, 1H, integration 1.5)
- 2.70 (d, 1H, integration 1.5)
- 2.60 (d, 1H, integration 1.5)
- 2.50 (d, 1H, integration 1.5)
- 2.40 (d, 1H, integration 1.5)
- 2.30 (d, 1H, integration 1.5)
- 2.20 (d, 1H, integration 1.5)
- 2.10 (d, 1H, integration 1.5)
- 2.00 (d, 1H, integration 1.5)
- 1.90 (d, 1H, integration 1.5)
- 1.80 (d, 1H, integration 1.5)
- 1.70 (d, 1H, integration 1.5)
- 1.60 (d, 1H, integration 1.5)
- 1.50 (d, 1H, integration 1.5)
- 1.40 (d, 1H, integration 1.5)
- 1.30 (d, 1H, integration 1.5)
- 1.20 (d, 1H, integration 1.5)
- 1.10 (d, 1H, integration 1.5)
- 1.00 (d, 1H, integration 1.5)
- 0.90 (d, 1H, integration 1.5)
- 0.80 (d, 1H, integration 1.5)
- 0.70 (d, 1H, integration 1.5)
- 0.60 (d, 1H, integration 1.5)
- 0.50 (d, 1H, integration 1.5)
- 0.40 (d, 1H, integration 1.5)
- 0.30 (d, 1H, integration 1.5)
- 0.20 (d, 1H, integration 1.5)
- 0.10 (d, 1H, integration 1.5)
- 0.00 (d, 1H, integration 1.5)

The <sup>13</sup>C NMR spectrum (100 MHz, CDCl<sub>3</sub>) shows the following peaks (ppm):

- 147.09
- 142.53
- 124.43
- 122.98
- 87.97
- 77.25
- 77.00
- 76.75
- 76.17
- 74.45
- 63.95
- 43.89
- 25.96
- 25.82
- 23.57
- 18.37
- 18.03
- 15.89
- 4.68
- 5.36
- 5.44

Chemical structure of **4f** is shown above the spectrum. The structure is a 1,3-dioxolane ring with a 4-methylphenyl ester group at C2, a 4-methylphenyl ester group at C4, and a 2-(pyridin-2-yl)thiophen-5-yl group at C5.

**1H NMR spectrum (CDCl<sub>3</sub>) data:**

| Chemical Shift (ppm) | Integration |
|----------------------|-------------|
| 8.50                 | 1.00        |
| 8.00                 | 4.22        |
| 7.50                 | 1.00        |
| 7.20                 | 1.00        |
| 7.00                 | 2.22        |
| 6.80                 | 2.22        |
| 6.60                 | 1.00        |
| 6.40                 | 1.00        |
| 6.20                 | 1.11        |
| 6.00                 | 2.22        |
| 5.80                 | 1.11        |
| 5.60                 | 1.11        |
| 5.40                 | 3.33        |
| 5.20                 | 1.11        |
| 5.00                 | 1.99        |
| 4.80                 | 1.44        |
| 4.60                 | 0.33        |
| 4.40                 | 0.00        |

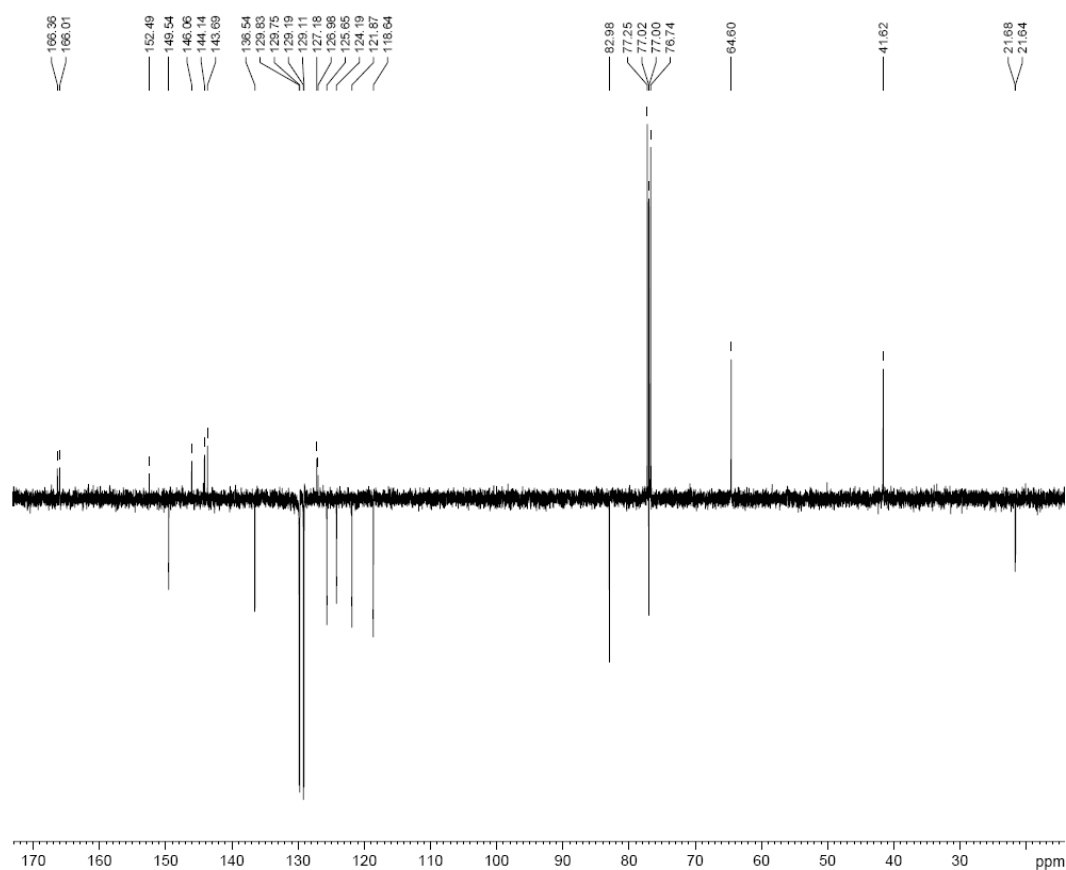

# NMR spectra of 4g

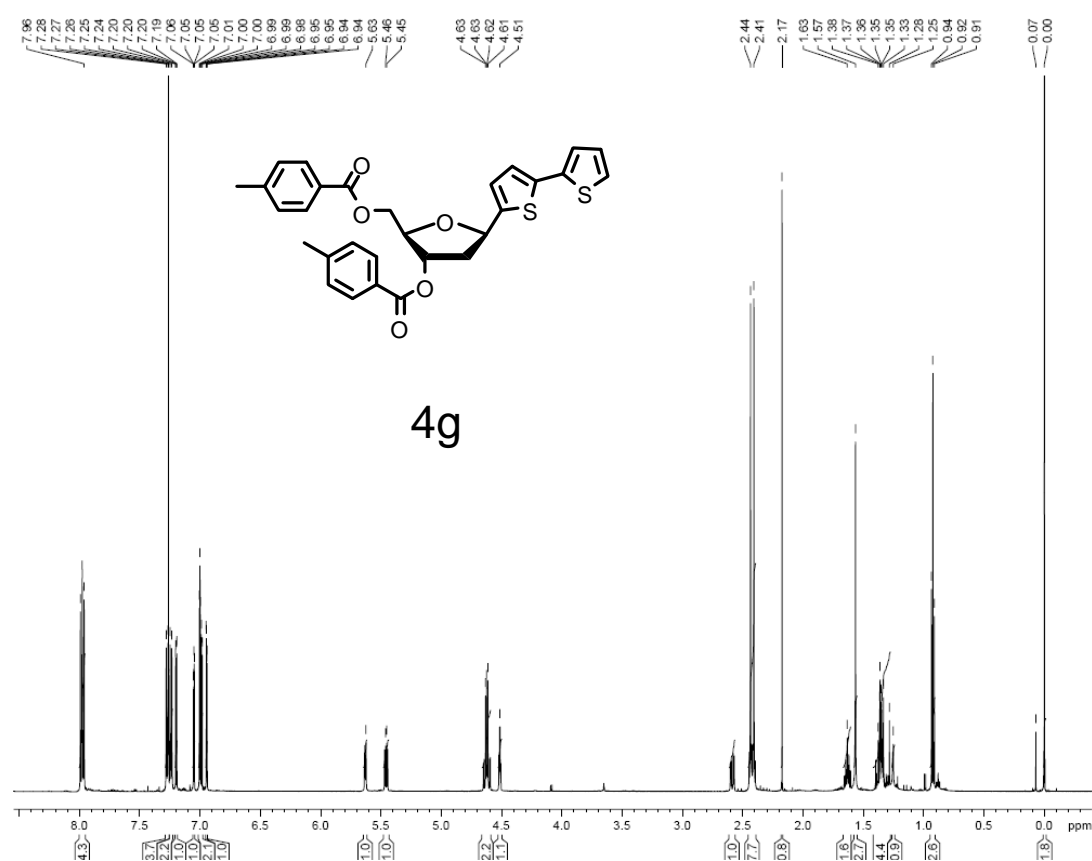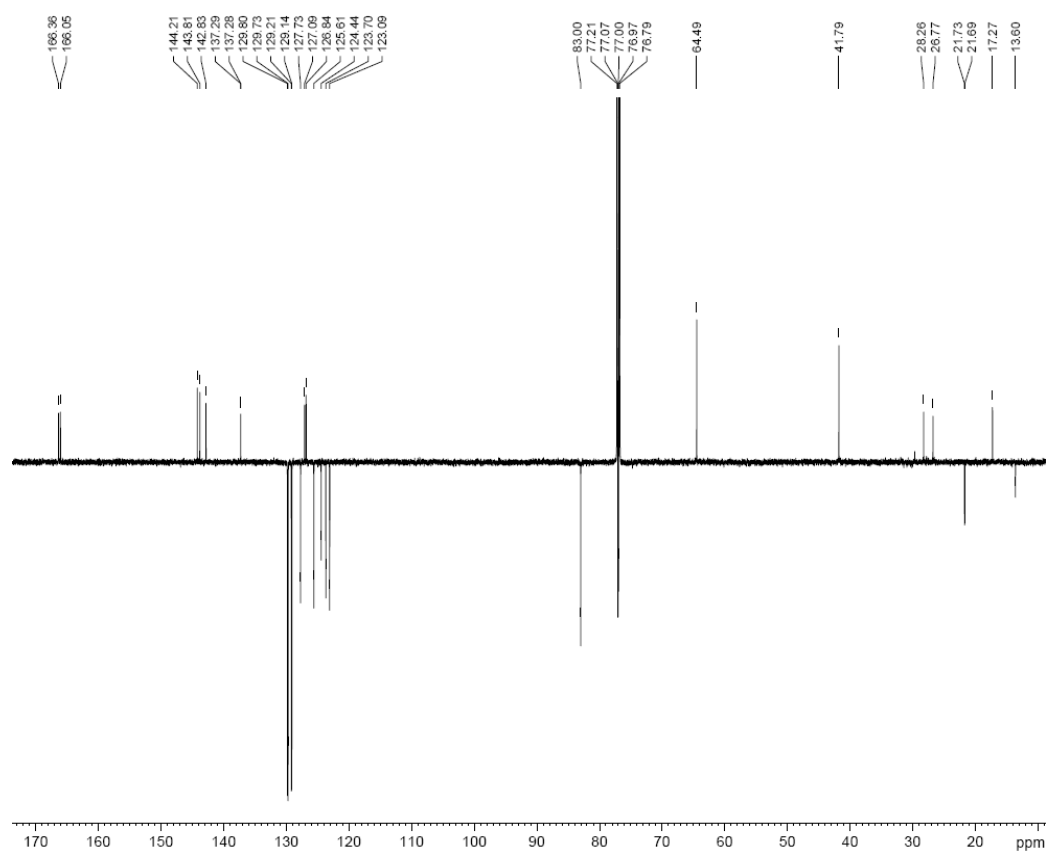



# NMR spectra of 4h

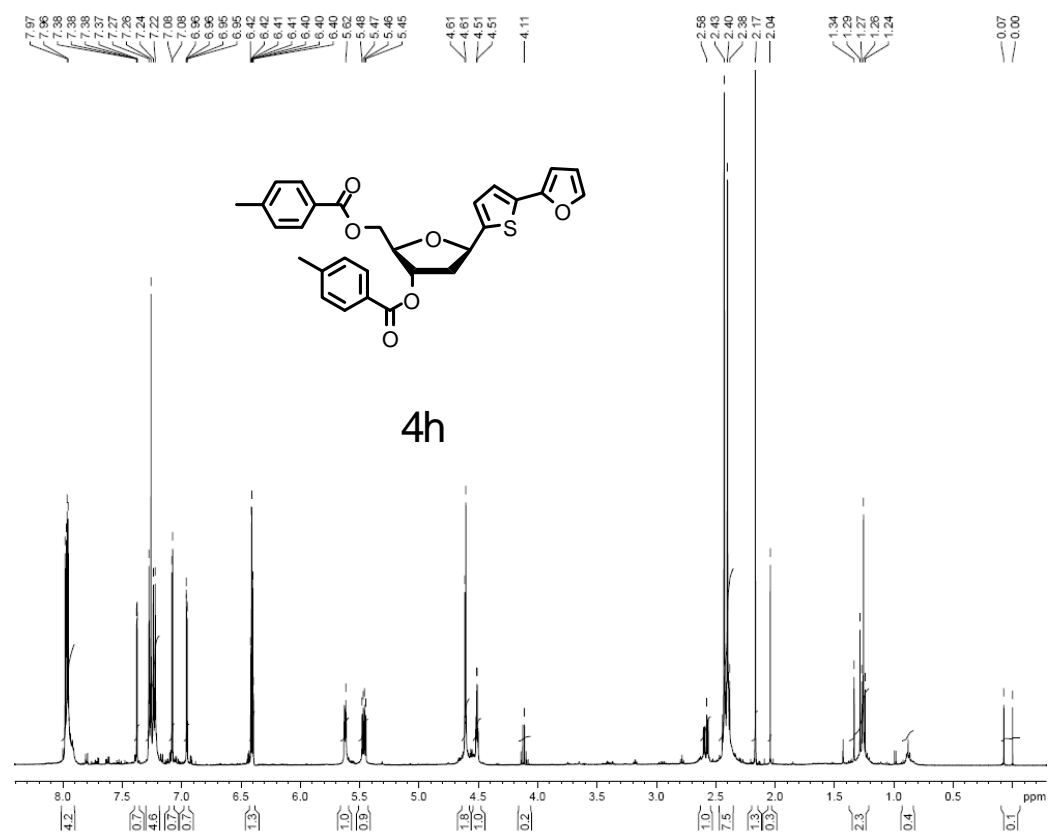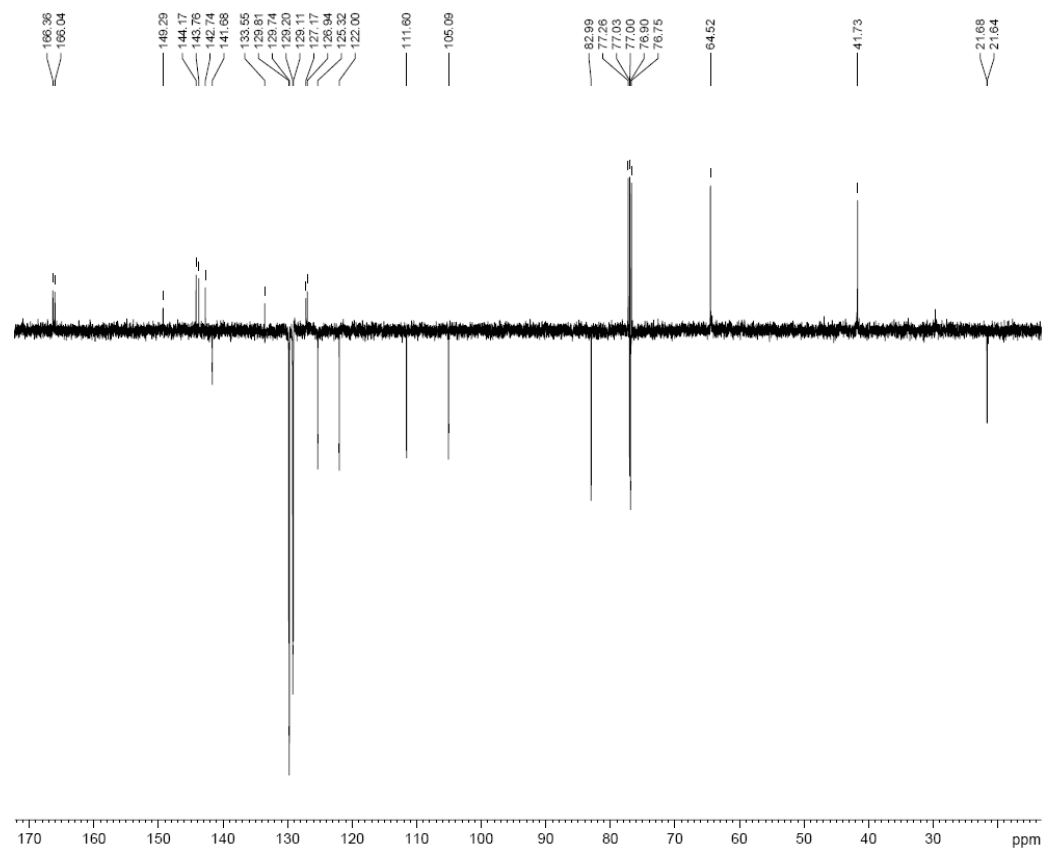

[illegible]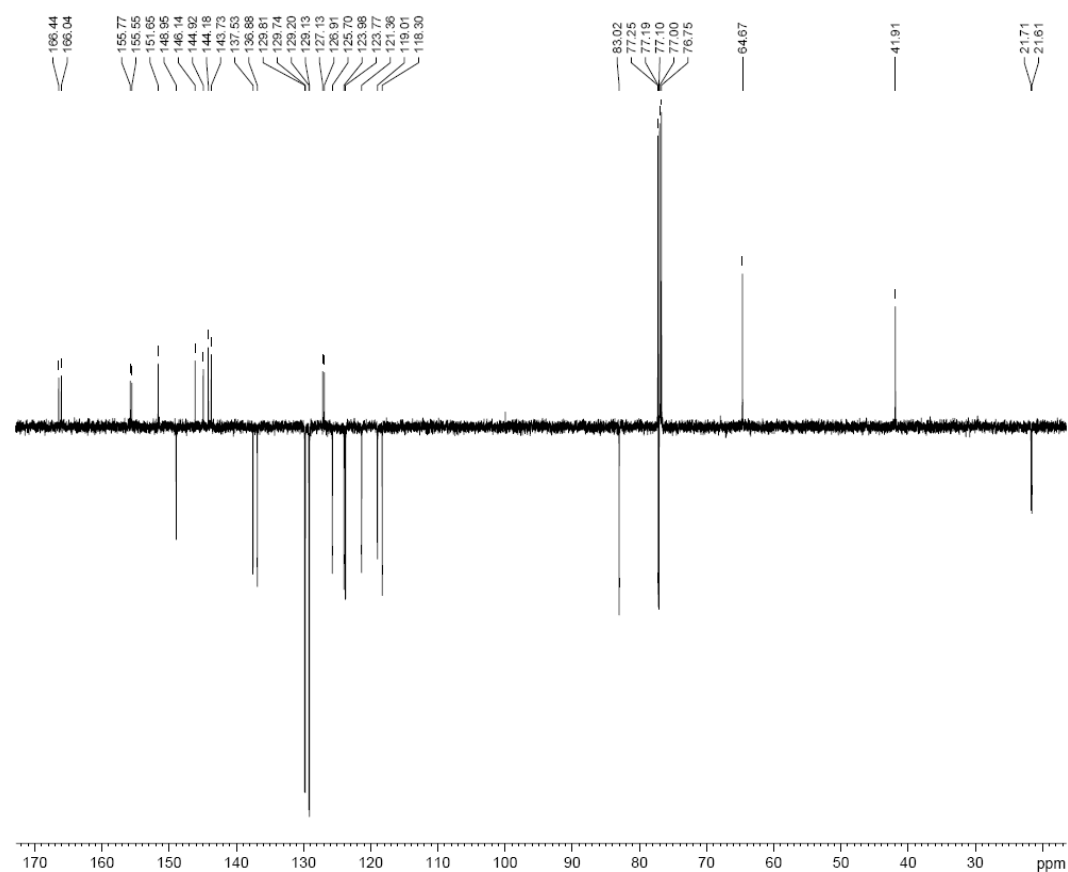

# NMR spectra of 7k

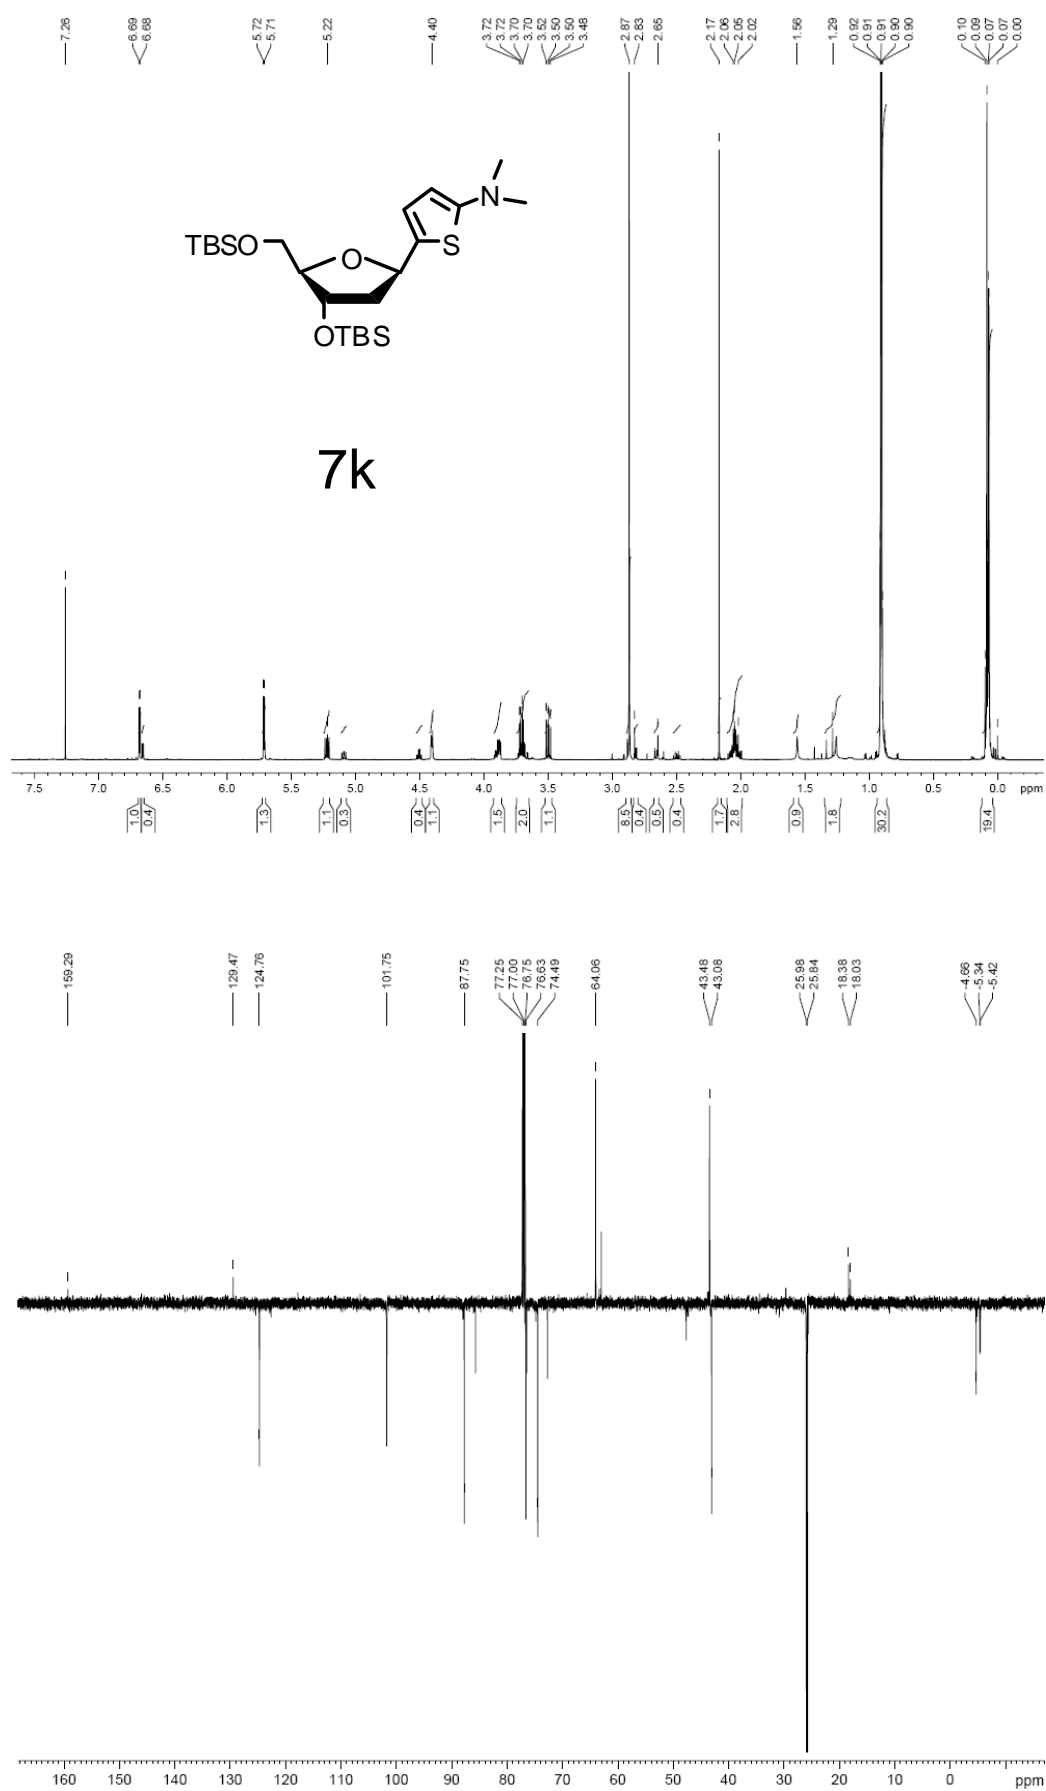

# NMR spectra of 6l

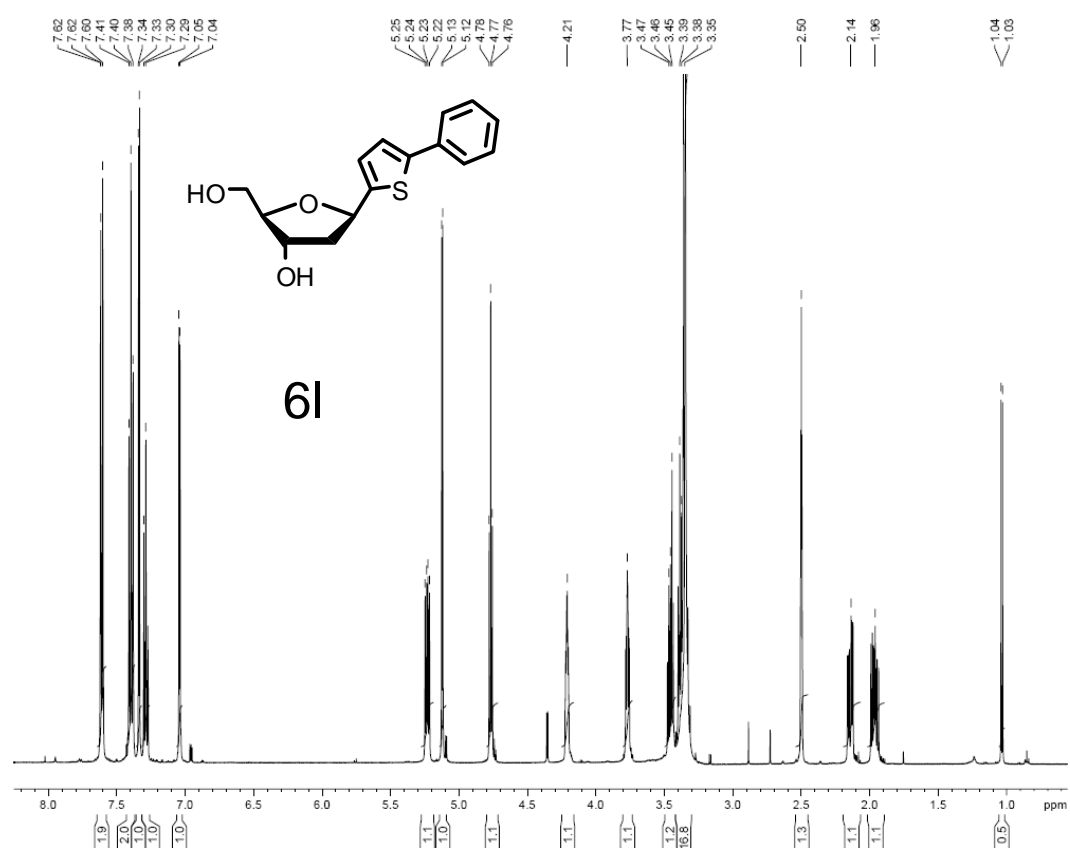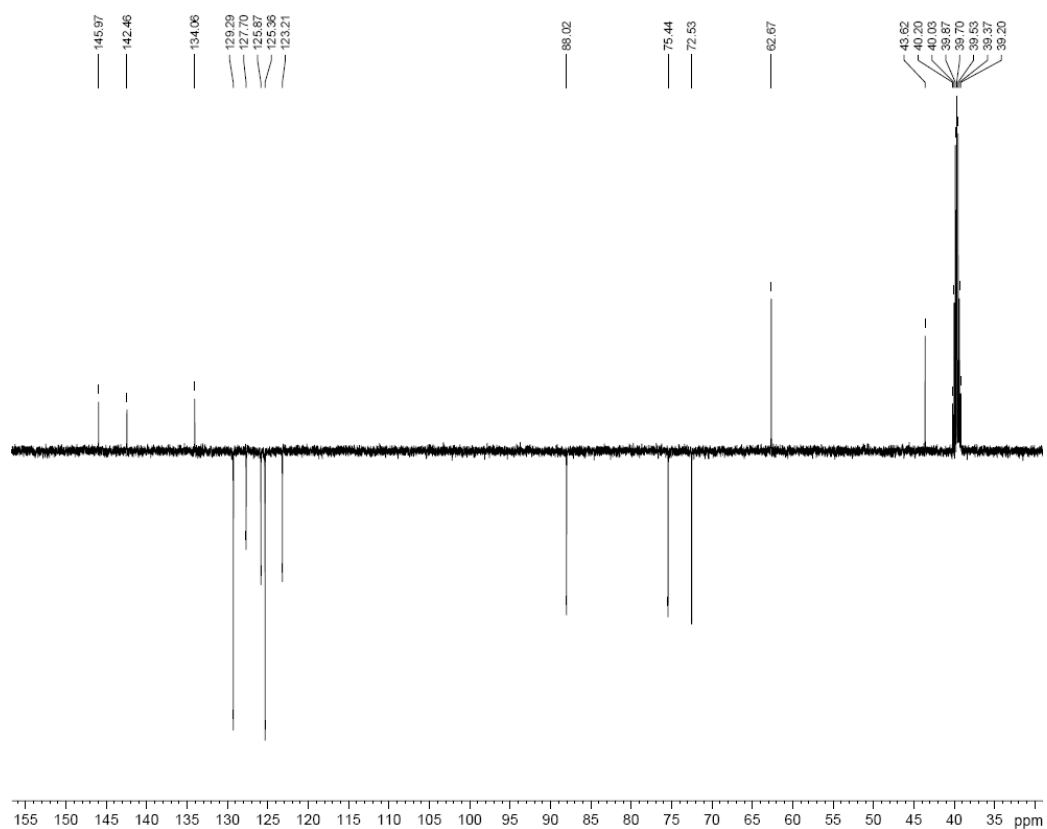

# NMR spectra of 6m

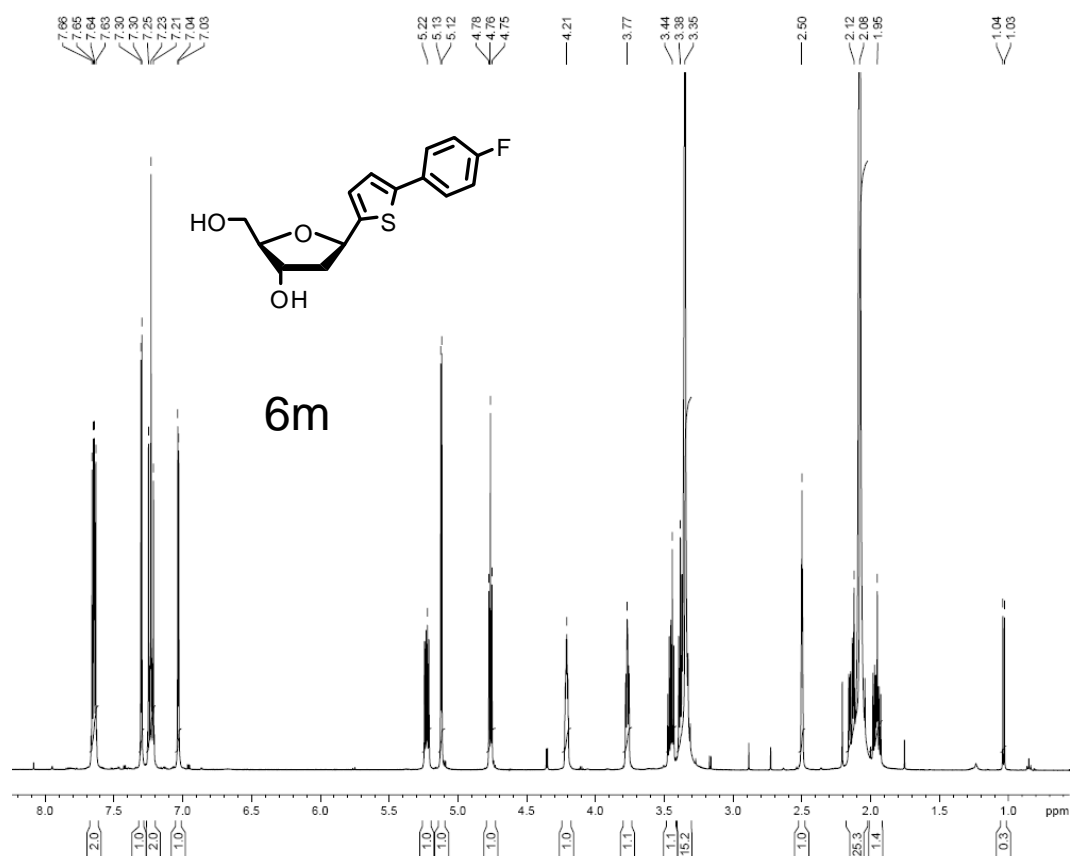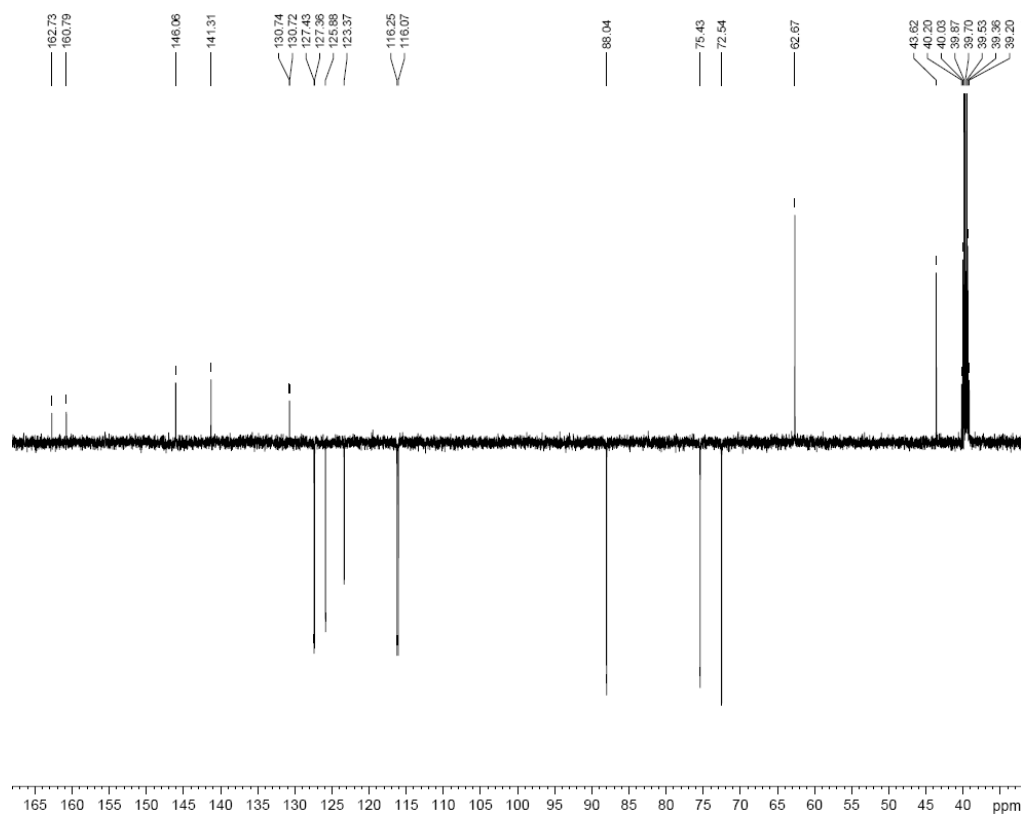

# NMR spectra of 6n

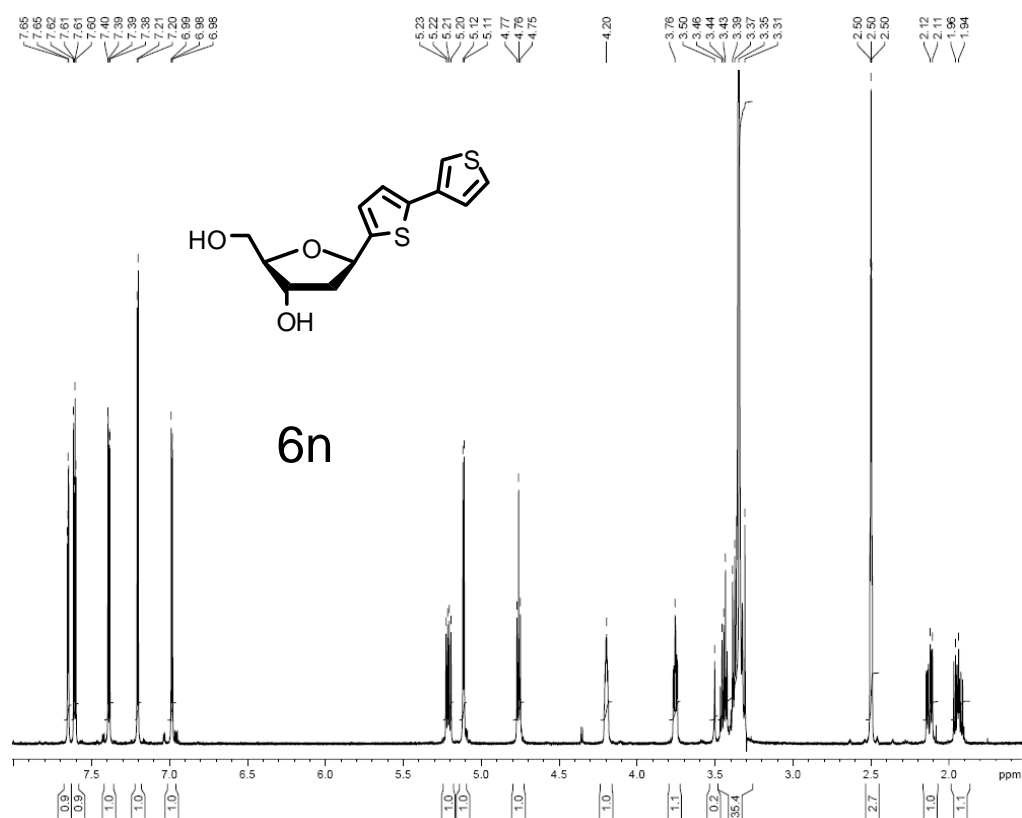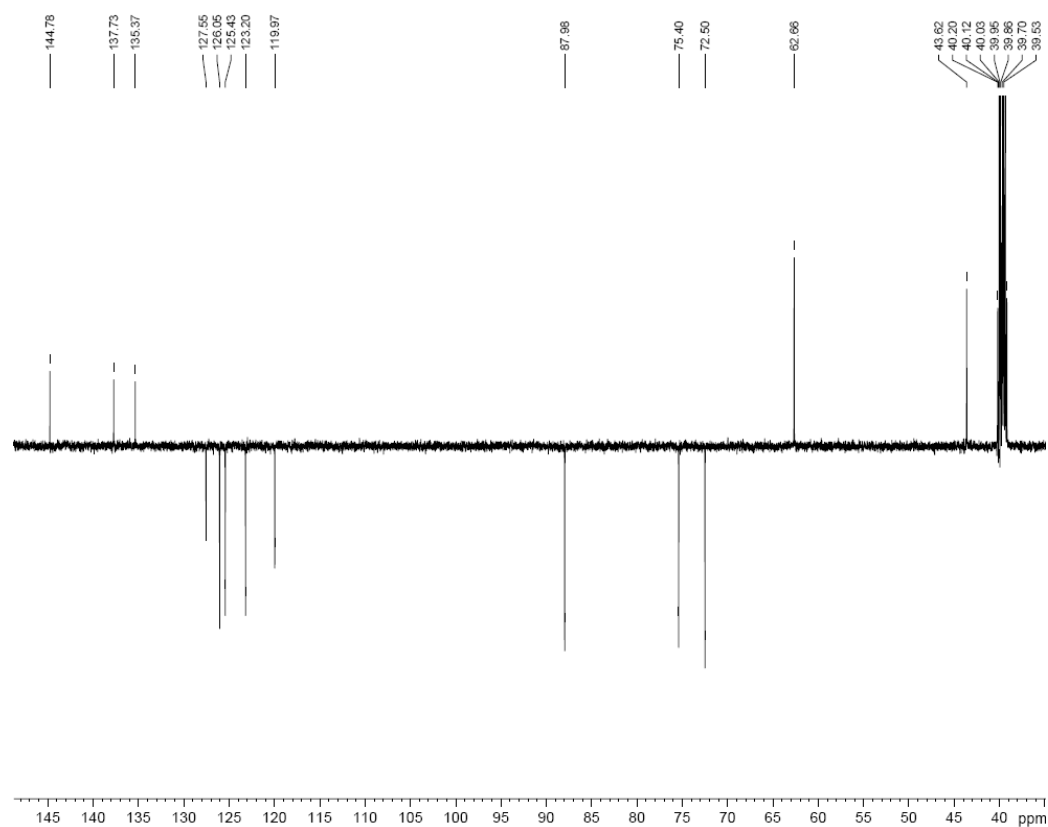

# NMR spectra of 60

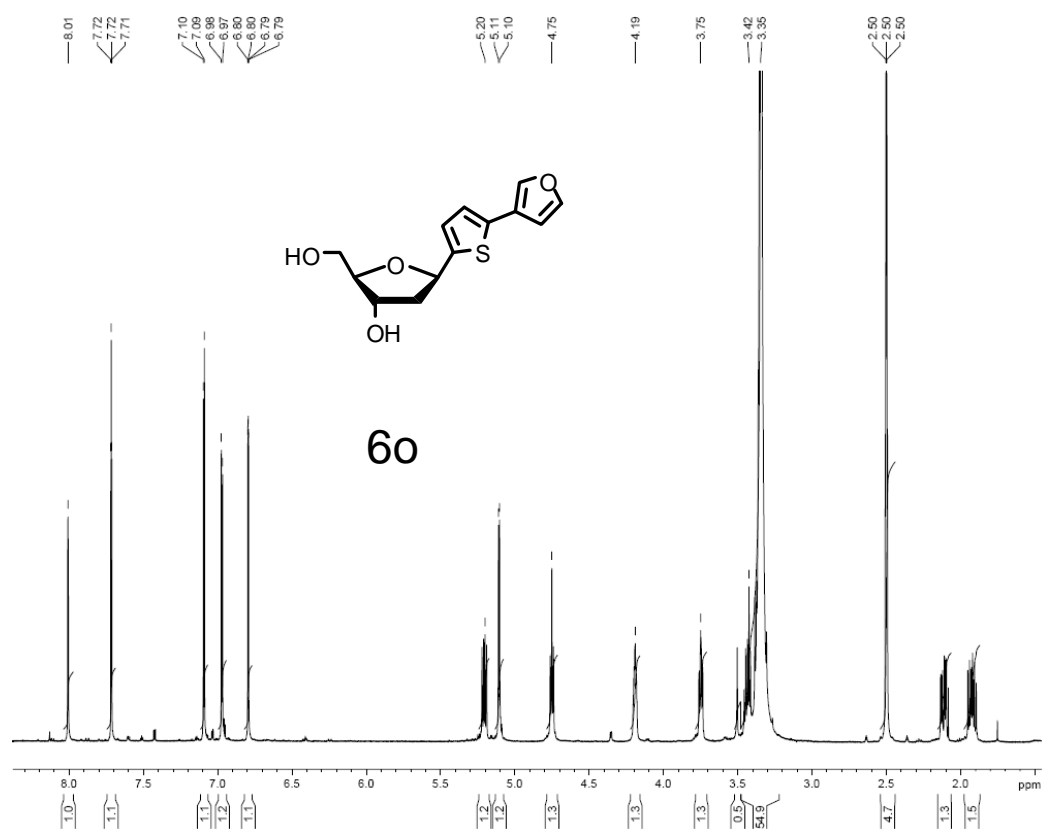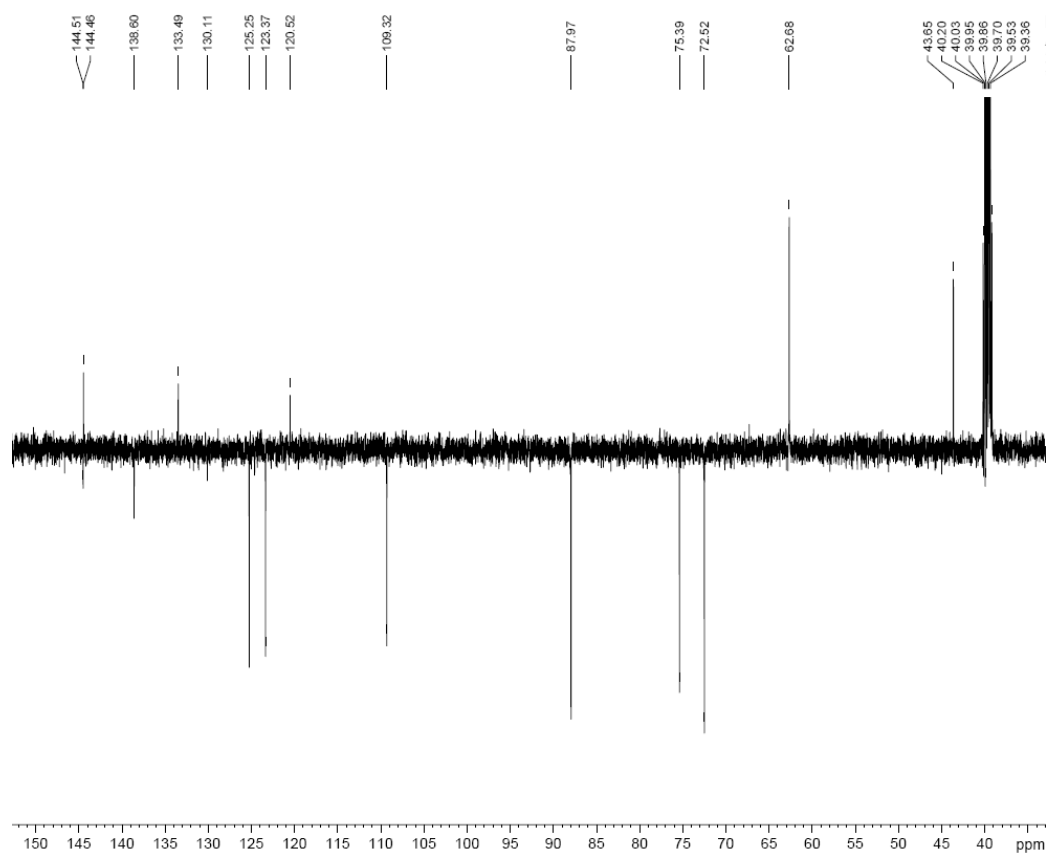

Chemical structure of **6p** is shown above the spectrum. The structure is a thiophene derivative with a 4-nitrophenyl group and a 2,3-dihydroxypropyl group.

<sup>1</sup>H NMR spectrum (CDCl<sub>3</sub>) of **6p** is shown below the structure. The spectrum displays peaks corresponding to the protons in the molecule, with chemical shifts (ppm) indicated above the peaks and integration values below the peaks.

Chemical shifts (ppm) labeled above the spectrum: 8.13, 8.12, 8.11, 8.09, 8.08, 8.06, 8.05, 8.04, 8.03, 8.02, 8.01, 8.00, 7.99, 7.98, 7.97, 7.96, 7.95, 7.94, 7.93, 7.92, 7.91, 7.90, 7.89, 7.88, 7.87, 7.86, 7.85, 7.84, 7.83, 7.82, 7.81, 7.80, 7.79, 7.78, 7.77, 7.76, 7.75, 7.74, 7.73, 7.72, 7.71, 7.70, 7.69, 7.68, 7.67, 7.66, 7.65, 7.64, 7.63, 7.62, 7.61, 7.60, 7.59, 7.58, 7.57, 7.56, 7.55, 7.54, 7.53, 7.52, 7.51, 7.50, 7.49, 7.48, 7.47, 7.46, 7.45, 7.44, 7.43, 7.42, 7.41, 7.40, 7.39, 7.38, 7.37, 7.36, 7.35, 7.34, 7.33, 7.32, 7.31, 7.30, 7.29, 7.28, 7.27, 7.26, 7.25, 7.24, 7.23, 7.22, 7.21, 7.20, 7.19, 7.18, 7.17, 7.16, 7.15, 7.14, 7.13, 7.12, 7.11, 7.10, 7.09, 7.08, 7.07, 7.06, 7.05, 7.04, 7.03, 7.02, 7.01, 7.00, 6.99, 6.98, 6.97, 6.96, 6.95, 6.94, 6.93, 6.92, 6.91, 6.90, 6.89, 6.88, 6.87, 6.86, 6.85, 6.84, 6.83, 6.82, 6.81, 6.80, 6.79, 6.78, 6.77, 6.76, 6.75, 6.74, 6.73, 6.72, 6.71, 6.70, 6.69, 6.68, 6.67, 6.66, 6.65, 6.64, 6.63, 6.62, 6.61, 6.60, 6.59, 6.58, 6.57, 6.56, 6.55, 6.54, 6.53, 6.52, 6.51, 6.50, 6.49, 6.48, 6.47, 6.46, 6.45, 6.44, 6.43, 6.42, 6.41, 6.40, 6.39, 6.38, 6.37, 6.36, 6.35, 6.34, 6.33, 6.32, 6.31, 6.30, 6.29, 6.28, 6.27, 6.26, 6.25, 6.24, 6.23, 6.22, 6.21, 6.20, 6.19, 6.18, 6.17, 6.16, 6.15, 6.14, 6.13, 6.12, 6.11, 6.10, 6.09, 6.08, 6.07, 6.06, 6.05, 6.04, 6.03, 6.02, 6.01, 6.00, 5.99, 5.98, 5.97, 5.96, 5.95, 5.94, 5.93, 5.92, 5.91, 5.90, 5.89, 5.88, 5.87, 5.86, 5.85, 5.84, 5.83, 5.82, 5.81, 5.80, 5.79, 5.78, 5.77, 5.76, 5.75, 5.74, 5.73, 5.72, 5.71, 5.70, 5.69, 5.68, 5.67, 5.66, 5.65, 5.64, 5.63, 5.62, 5.61, 5.60, 5.59, 5.58, 5.57, 5.56, 5.55, 5.54, 5.53, 5.52, 5.51, 5.50, 5.49, 5.48, 5.47, 5.46, 5.45, 5.44, 5.43, 5.42, 5.41, 5.40, 5.39, 5.38, 5.37, 5.36, 5.35, 5.34, 5.33, 5.32, 5.31, 5.30, 5.29, 5.28, 5.27, 5.26, 5.25, 5.24, 5.23, 5.22, 5.21, 5.20, 5.19, 5.18, 5.17, 5.16, 5.15, 5.14, 5.13, 5.12, 5.11, 5.10, 5.09, 5.08, 5.07, 5.06, 5.05, 5.04, 5.03, 5.02, 5.01, 5.00, 4.99, 4.98, 4.97, 4.96, 4.95, 4.94, 4.93, 4.92, 4.91, 4.90, 4.89, 4.88, 4.87, 4.86, 4.85, 4.84, 4.83, 4.82, 4.81, 4.80, 4.79, 4.78, 4.77, 4.76, 4.75, 4.74, 4.73, 4.72, 4.71, 4.70, 4.69, 4.68, 4.67, 4.66, 4.65, 4.64, 4.63, 4.62, 4.61, 4.60, 4.59, 4.58, 4.57, 4.56, 4.55, 4.54, 4.53, 4.52, 4.51, 4.50, 4.49, 4.48, 4.47, 4.46, 4.45, 4.44, 4.43, 4.42, 4.41, 4.40, 4.39, 4.38, 4.37, 4.36, 4.35, 4.34, 4.33, 4.32, 4.31, 4.30, 4.29, 4.28, 4.27, 4.26, 4.25, 4.24, 4.23, 4.22, 4.21, 4.20, 4.19, 4.18, 4.17, 4.16, 4.15, 4.14, 4.13, 4.12, 4.11, 4.10, 4.09, 4.08, 4.07, 4.06, 4.05, 4.04, 4.03, 4.02, 4.01, 4.00, 3.99, 3.98, 3.97, 3.96, 3.95, 3.94, 3.93, 3.92, 3.91, 3.90, 3.89, 3.88, 3.87, 3.86, 3.85, 3.84, 3.83, 3.82, 3.81, 3.80, 3.79, 3.78, 3.77, 3.76, 3.75, 3.74, 3.73, 3.72, 3.71, 3.70, 3.69, 3.68, 3.67, 3.66, 3.65, 3.64, 3.63, 3.62, 3.61, 3.60, 3.59, 3.58, 3.57, 3.56, 3.55, 3.54, 3.53, 3.52, 3.51, 3.50, 3.49, 3.48, 3.47, 3.46, 3.45, 3.44, 3.43, 3.42, 3.41, 3.40, 3.39, 3.38, 3.37, 3.36, 3.35, 3.34, 3.33, 3.32, 3.31, 3.30, 3.29, 3.28, 3.27, 3.26, 3.25, 3.24, 3.23, 3.22, 3.21, 3.20, 3.19, 3.18, 3.17, 3.16, 3.15, 3.14, 3.13, 3.12, 3.11, 3.10, 3.09, 3.08, 3.07, 3.06, 3.05, 3.04, 3.03, 3.02, 3.01, 3.00, 2.99, 2.98, 2.97, 2.96, 2.95, 2.94, 2.93, 2.92, 2.91, 2.90, 2.89, 2.88, 2.87, 2.86, 2.85, 2.84, 2.83, 2.82, 2.81, 2.80, 2.79, 2.78, 2.77, 2.76, 2.75, 2.74, 2.73, 2.72, 2.71, 2.70, 2.69, 2.68, 2.67, 2.66, 2.65, 2.64, 2.63, 2.62, 2.61, 2.60, 2.59, 2.58, 2.57, 2.56, 2.55, 2.54, 2.53, 2.52, 2.51, 2.50, 2.49, 2.48, 2.47, 2.46, 2.45, 2.44, 2.43, 2.42, 2.41, 2.40, 2.39, 2.38, 2.37, 2.36, 2.35, 2.34, 2.33, 2.32, 2.31, 2.30, 2.29, 2.28, 2.27, 2.26, 2.25, 2.24, 2.23, 2.22, 2.21, 2.20, 2.19, 2.18, 2.17, 2.16, 2.15, 2.14, 2.13, 2.12, 2.11, 2.10, 2.09, 2.08, 2.07, 2.06, 2.05, 2.04, 2.03, 2.02, 2.01, 2.00, 1.99, 1.98, 1.97, 1.96, 1.95, 1.94, 1.93, 1.92, 1.91, 1.90, 1.89, 1.88, 1.87, 1.86, 1.85, 1.84, 1.83, 1.82, 1.81, 1.80, 1.79, 1.78, 1.77, 1.76, 1.75, 1.74, 1.73, 1.72, 1.71, 1.70, 1.69,

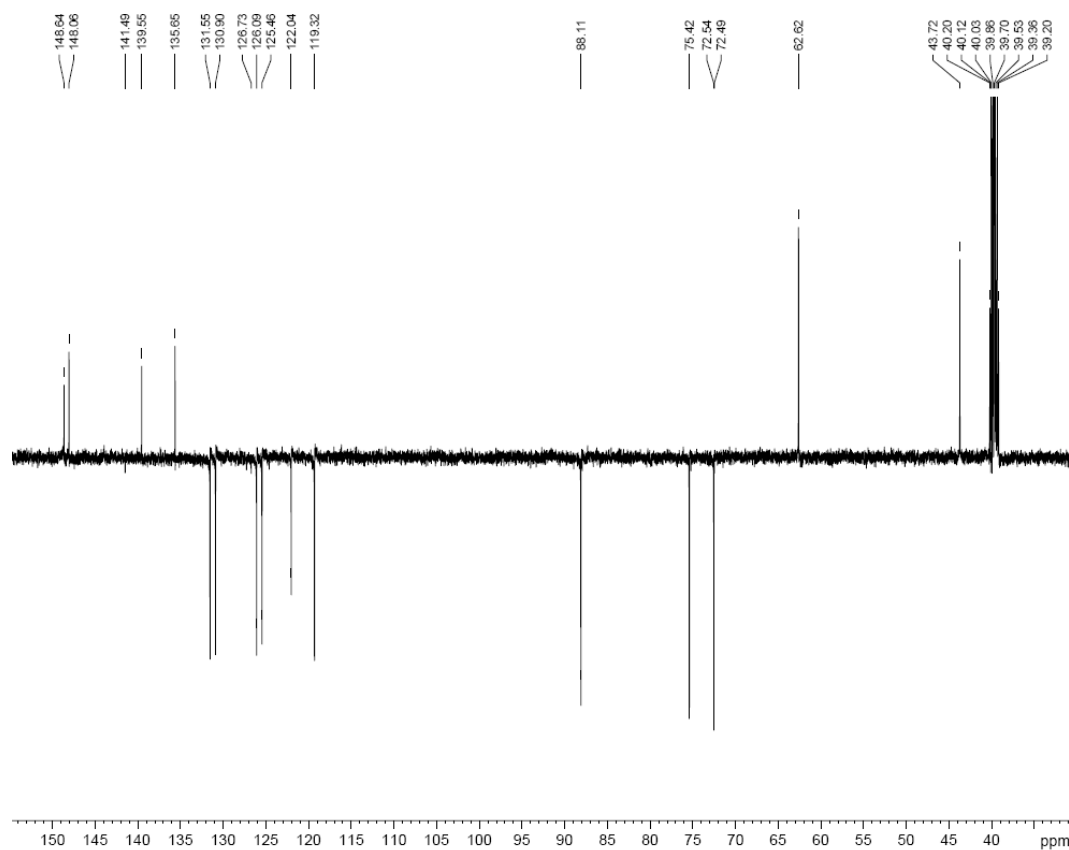



# NMR spectra of 6b

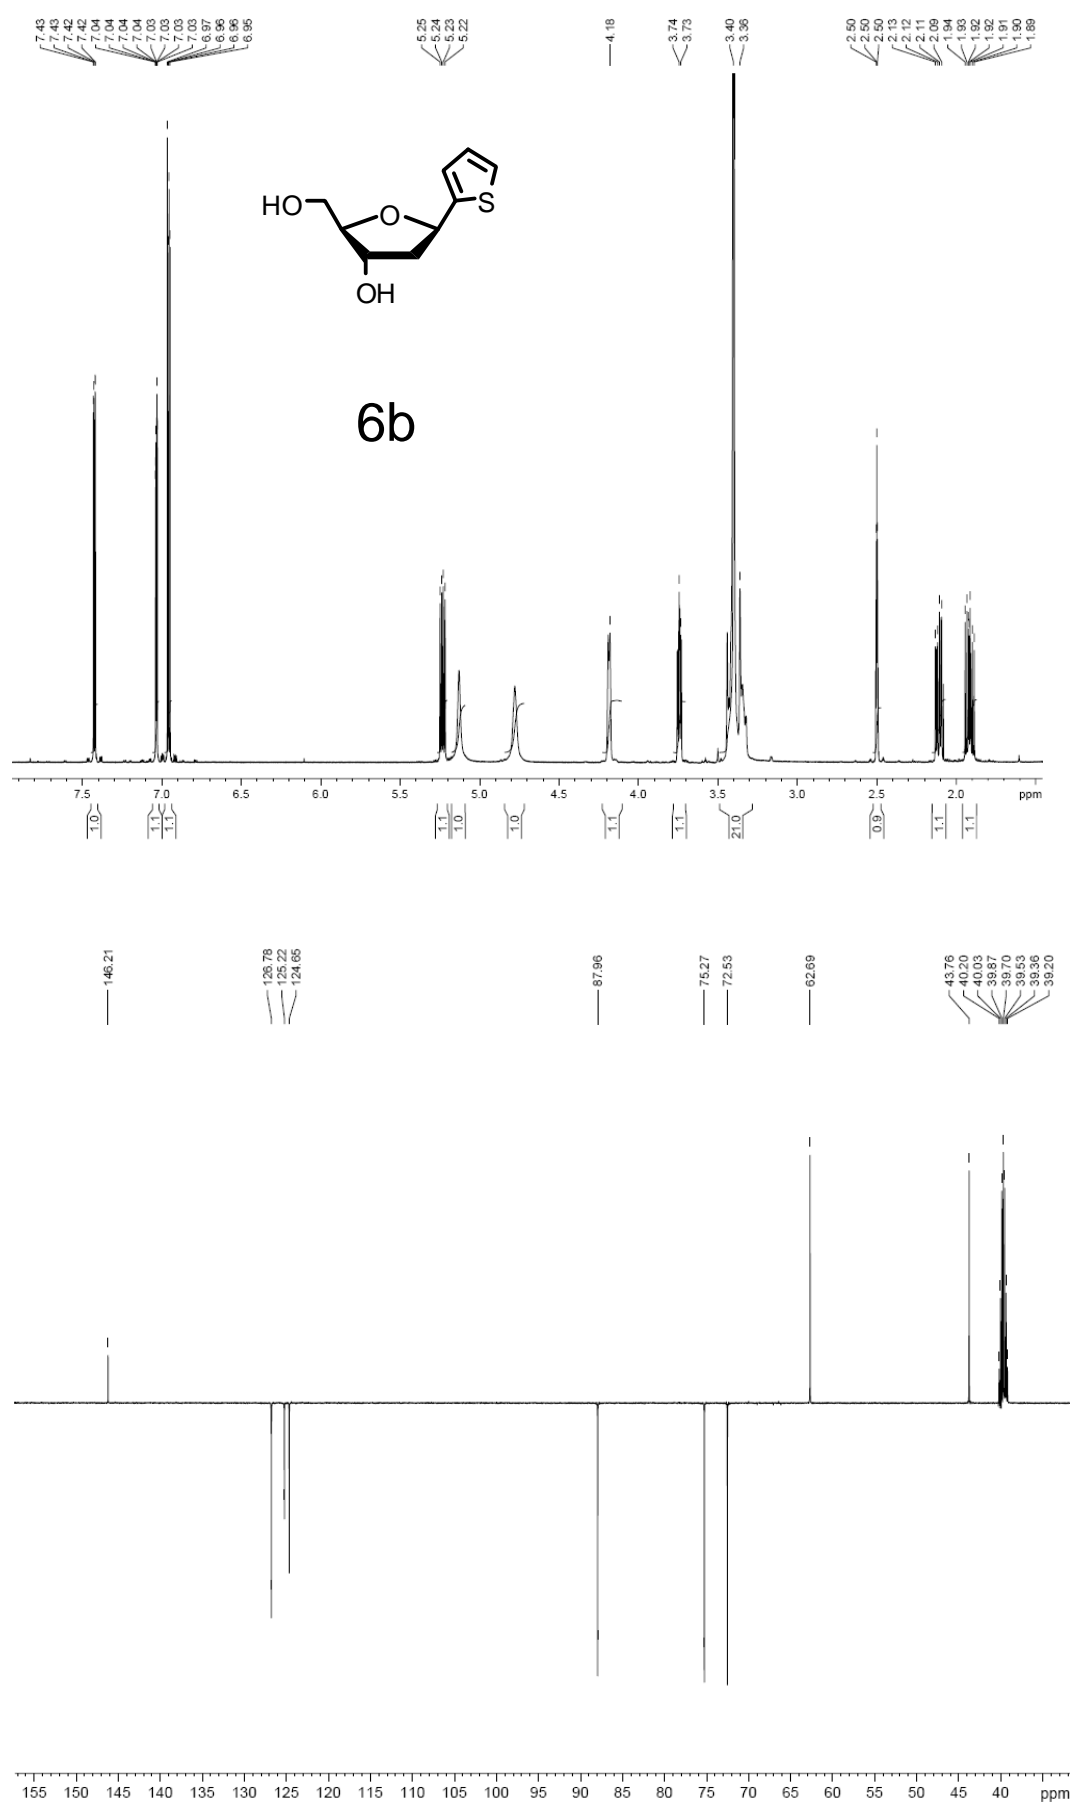

# NMR spectra of 6c

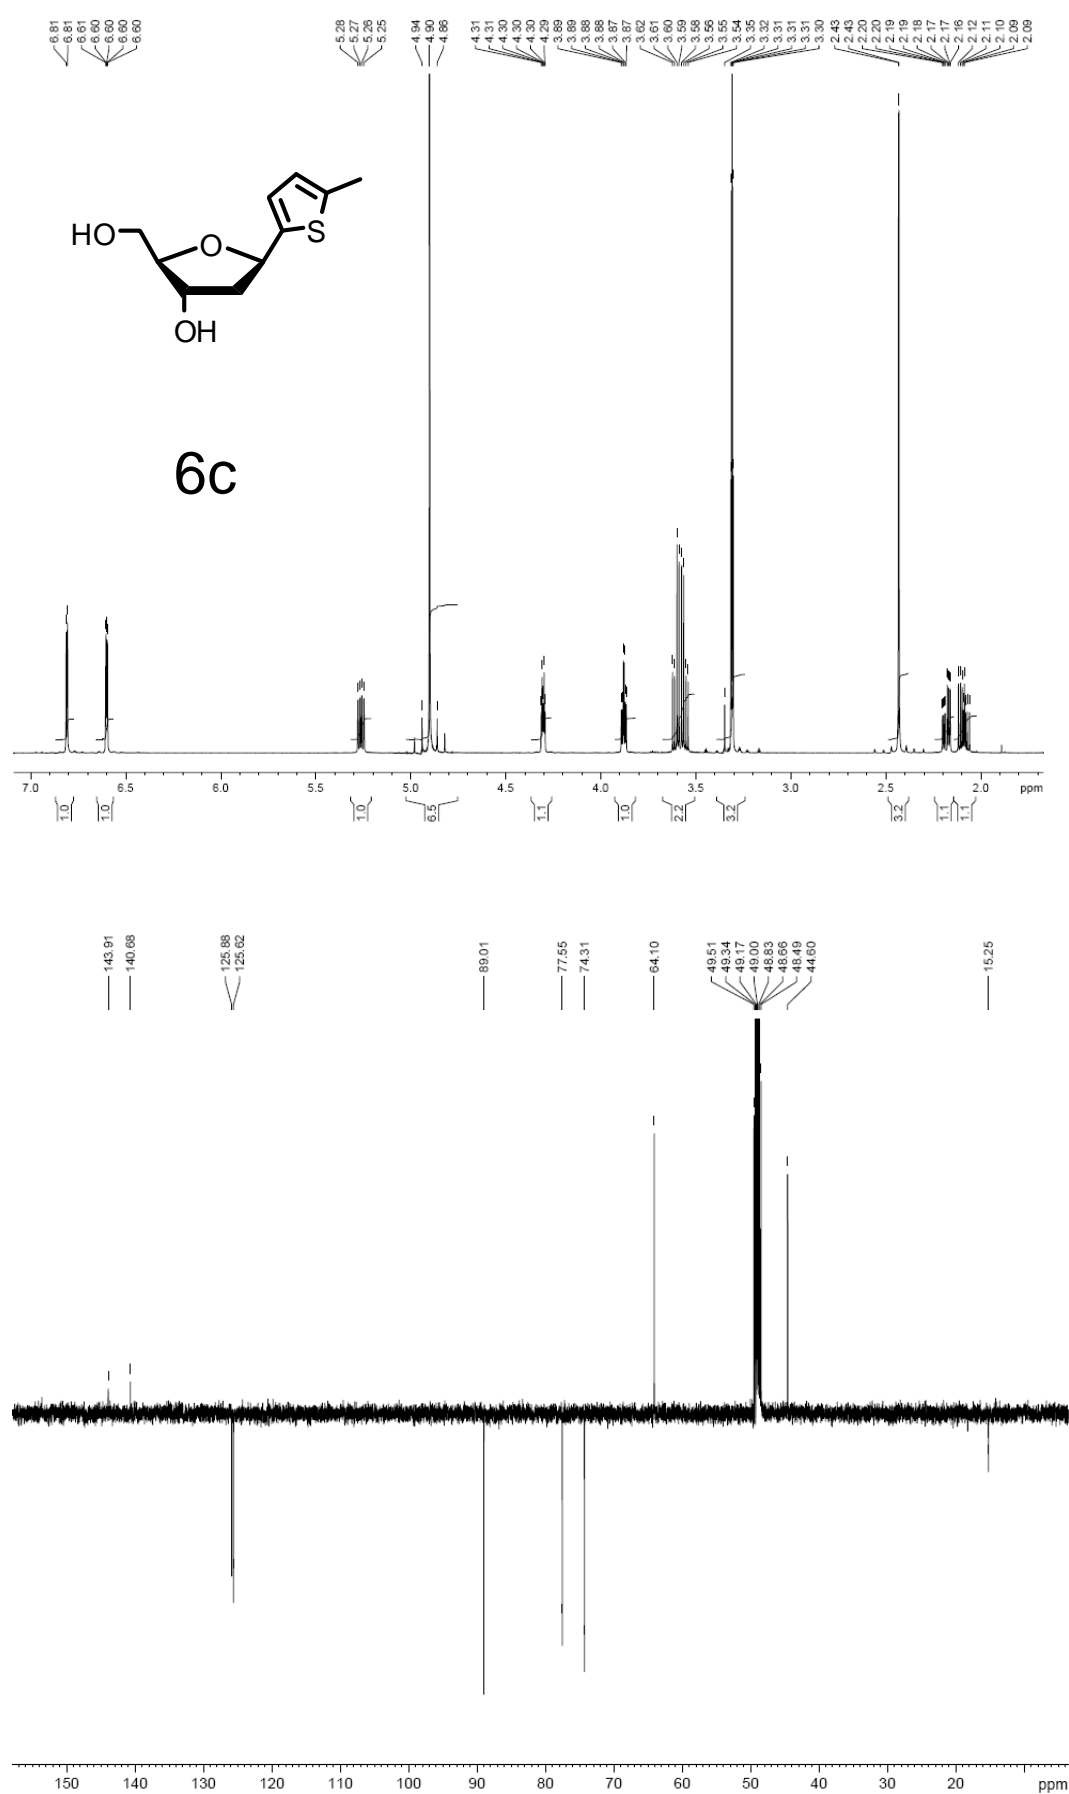

# NMR spectra of 6d

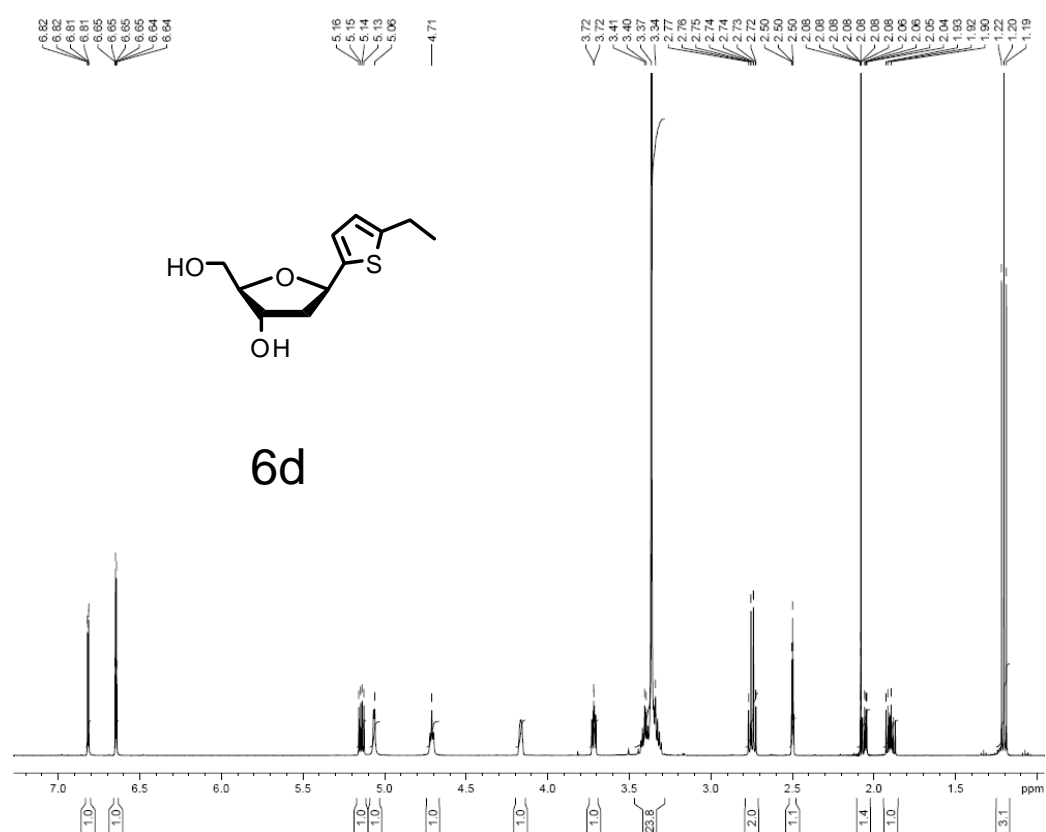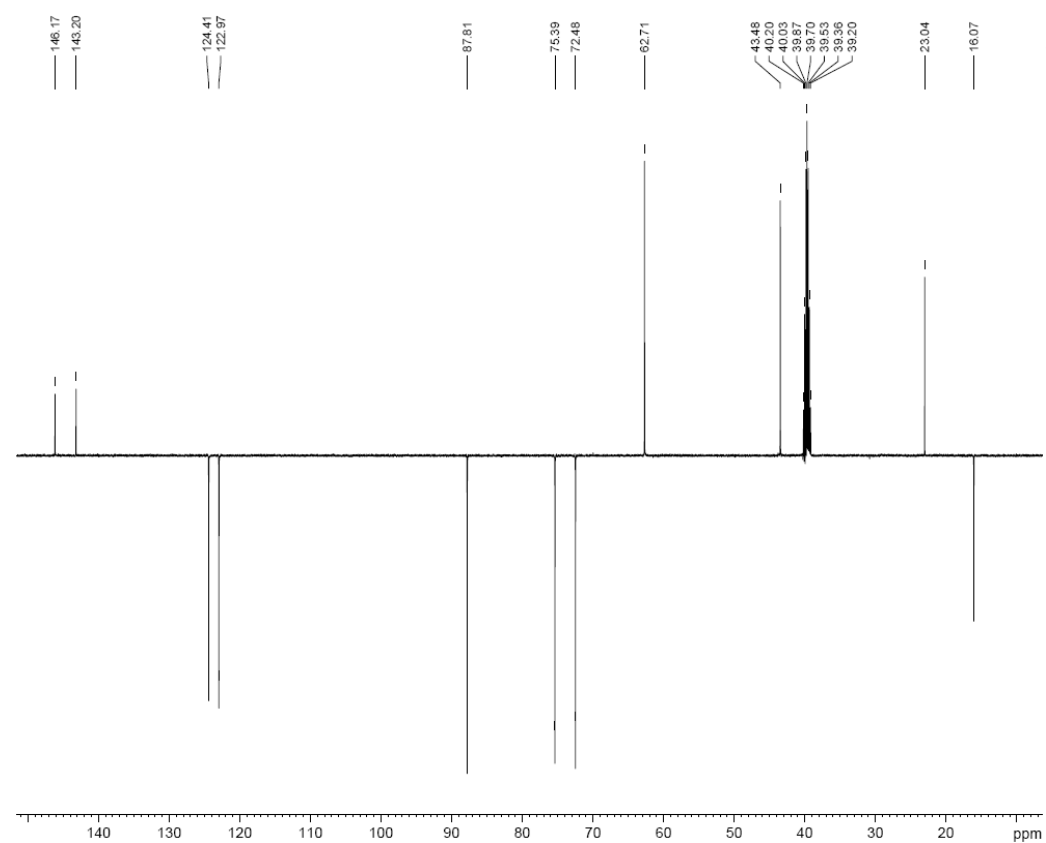

# NMR spectra of 6e

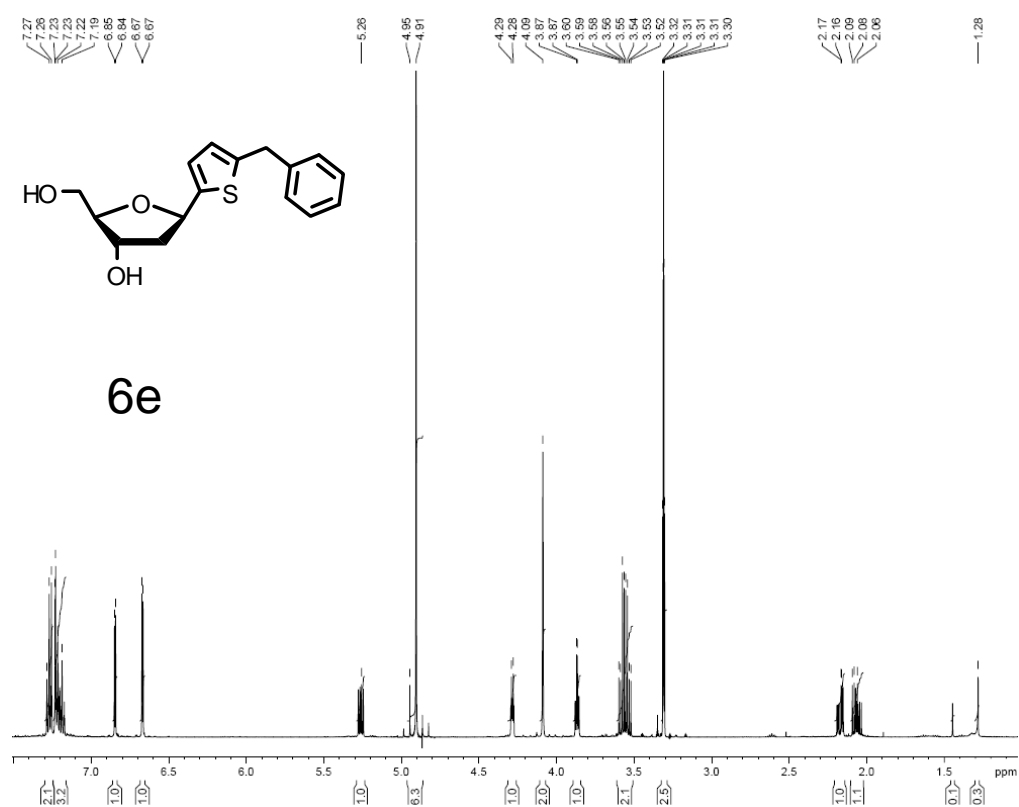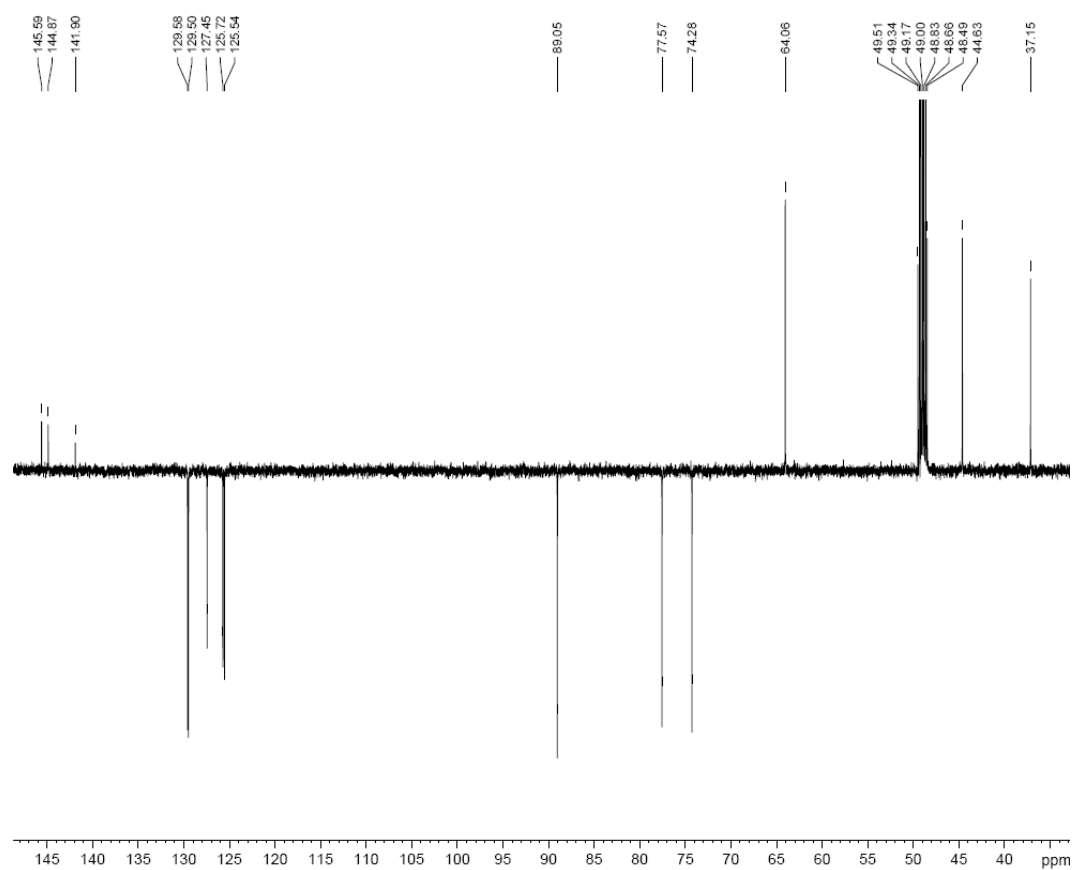

# NMR spectra of 6f

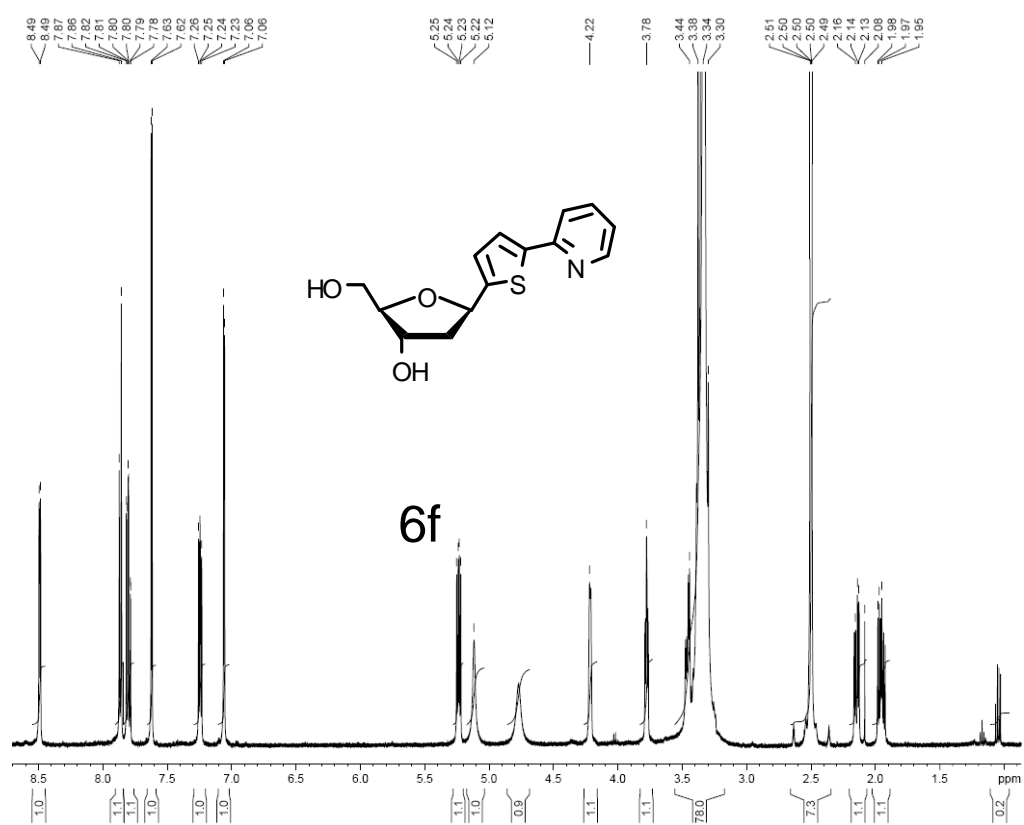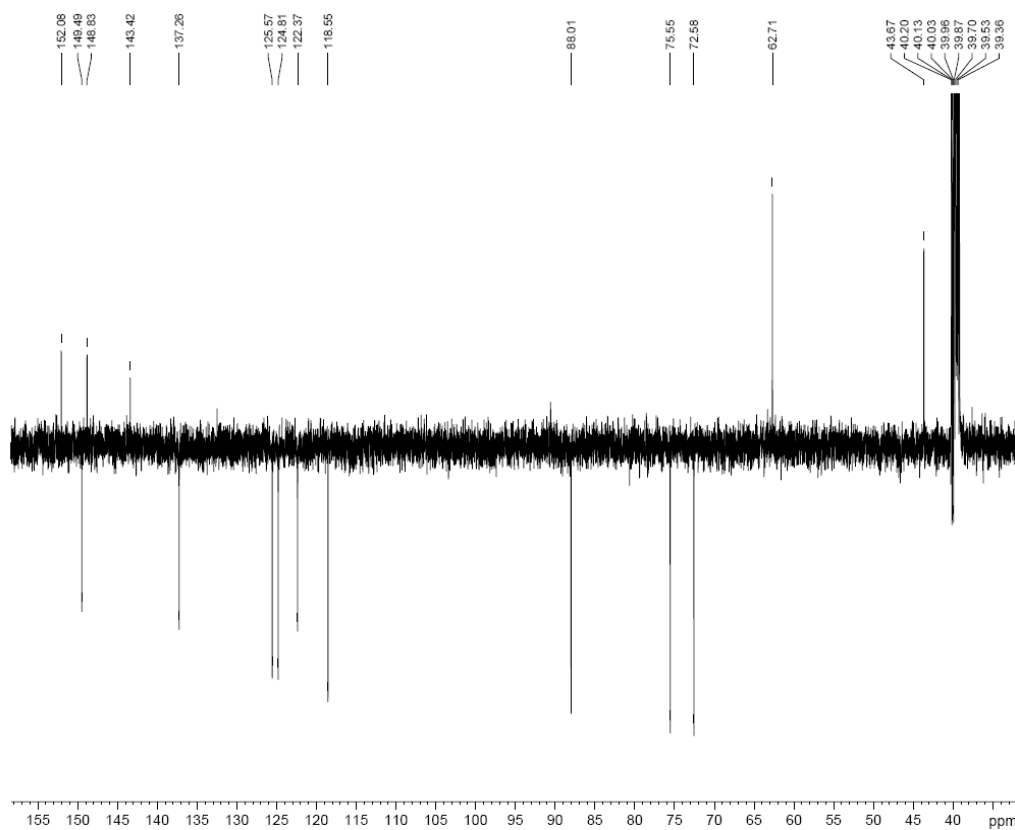

# NMR spectra of 6g

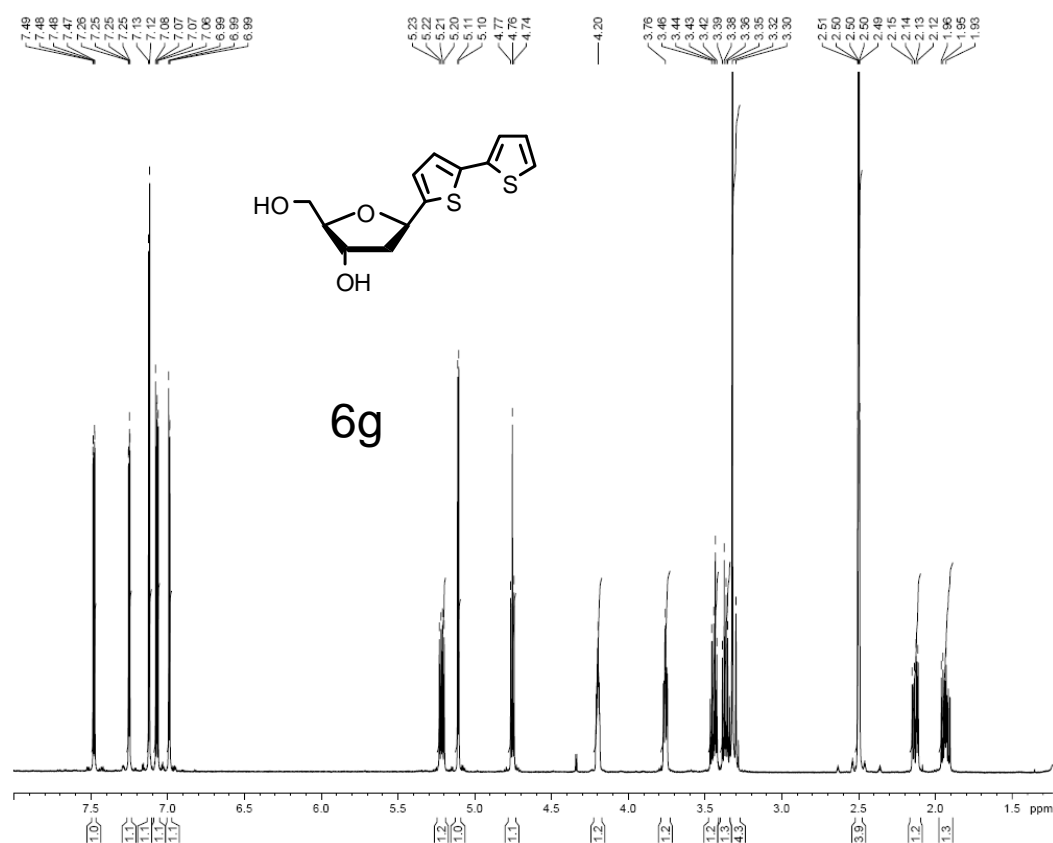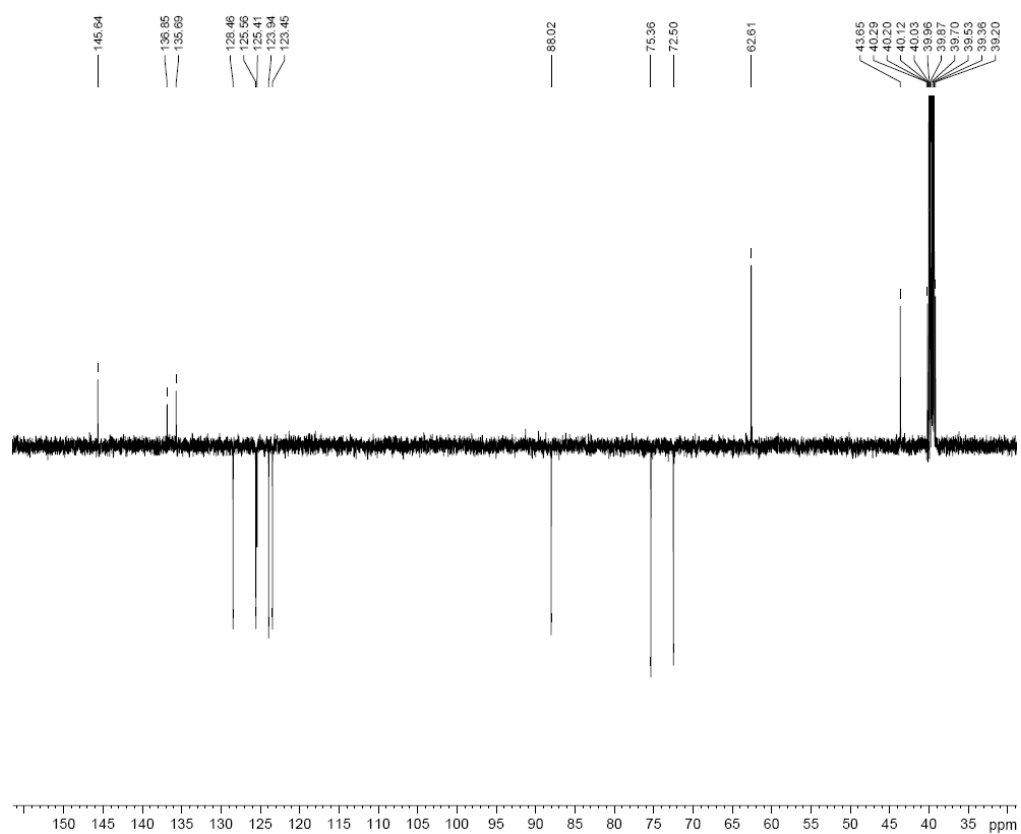

# NMR spectra of 6h

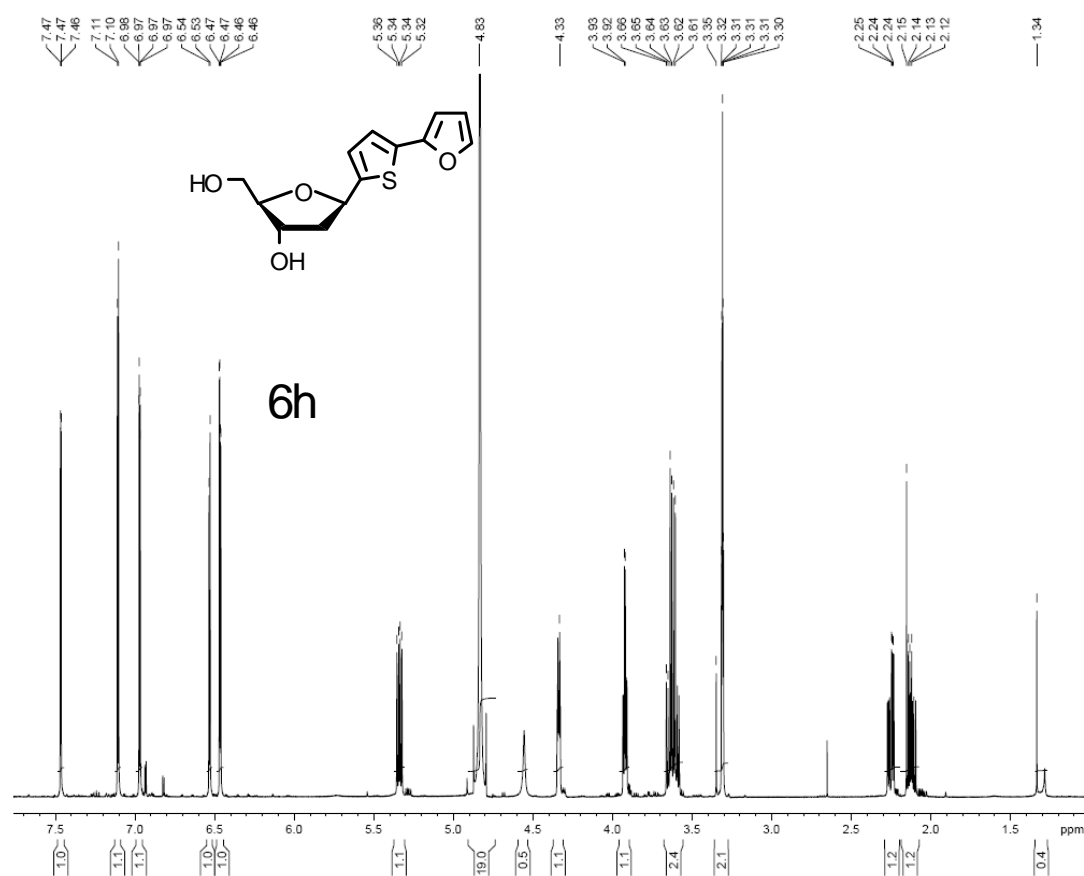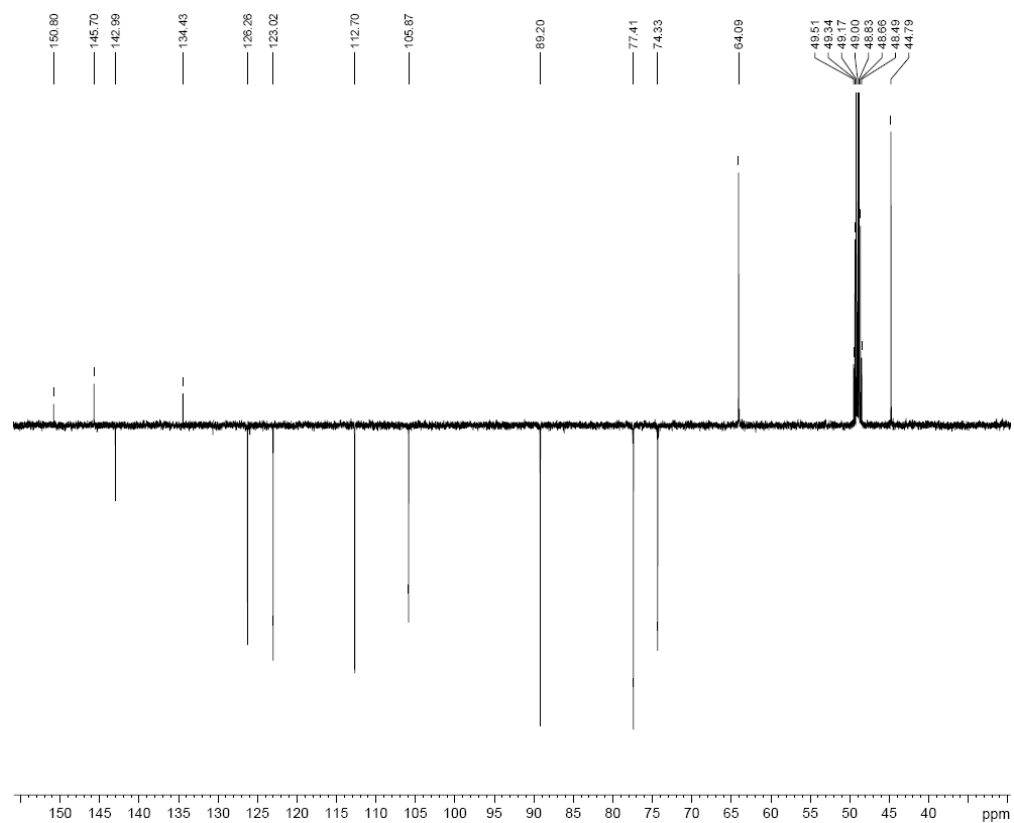

[illegible]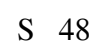

Supplement: Supplementary file 1 [file 4637245]
